# Supplementary material for: Genetic mechanisms associated with floral initiation and the repressive effect of fruit on flowering in apple (Malus x domestica Borkh)
Source: PLoS One. 2021 Feb 19;16(2):e0245487. doi: 10.1371/journal.pone.0245487 (PMC7894833; doi:10.1371/journal.pone.0245487)
Supplement: S3 Table — (XLSX) [file pone.0245487.s010.xlsx]

## Sheet: S3 Table
S3 Table. Novel transcripts that are expressed.
Transcript ID	NTFB_FPKM	TFB_FPKM	NT15_FPKM	T15_FPKM	NT35_FPKM	T35_FPKM	NT50_FPKM	T50_FPKM	NT70_FPKM	T70_FPKM
MSTRG.10.1	2.43886	0.531646	0.476488	0.459218	0.426401	0.218722	0	0.229875	0.380969	0.459457
MSTRG.10000.1	0.666672	2.87823e-06	0.000656467	4.10849e-19	8.14203e-08	1.25912	5.91227e-05	1.29632e-07	1.18032e-05	0.00202297
MSTRG.10000.2	0.542934	5.69865	7.59791e-12	3.92208	3.01022	2.14718	1.23081	0.00346715	4.14995	1.24529
MSTRG.10000.3	1.6602	4.12255	3.66318	0.00500151	1.21073	1.12686	1.81852	3.60728	2.63802	2.64821
MSTRG.10000.4	3.23095	8.14268e-05	4.5679	1.29398	2.86241	0.0023896	3.17269	1.5091	0.49103	2.02736
MSTRG.10001.1	1.24662	2.38516	0.620371	0.903801	1.28618	0.0426648	0.656221	0.447654	1.88659	1.5134
MSTRG.10013.1	1.61224	1.90923	2.50156	2.19549	2.11247	1.86151	4.53697	3.24	5.63421	3.53927
MSTRG.10014.1	0.748452	0.528771	1.44529	0.570582	1.8734	0.561117	0.927671	0.372012	0.0852953	0.897497
MSTRG.10015.1	0	0	0	0	1.11677	0	0	3.53658	0	0.912352
MSTRG.10017.1	0	0	0	4.47764	0	0	0	0	0	2.13483
MSTRG.1002.2	0.274411	0.296116	1.08363	0.263267	0.259825	0	0.860621	0.300678	0.149791	0.66462
MSTRG.10031.1	0.275929	1.1911	0.817157	1.32344	3.1541	2.59299	0.288417	0.784073	0.415967	0.890335
MSTRG.10047.1	2.17318	0.472548	1.27709	0.411106	0.380274	0.647281	0	0.610407	1.60647	0.68578
MSTRG.10048.2	1.35675	1.21598	0.934086	0.454561	1.61843	1.62138	1.53723e-37	0.672185	1.67932	0.865732
MSTRG.10051.1	0	0	1.13058	1.32084	1.53471	0.33943	1.67994	1.19327	1.54941	1.89696
MSTRG.10059.1	1.44302	0.390865	0	0	0.339987	0.536748	0.747859	0.341192	1.23524	1.61855
MSTRG.1006.1	0	0	0	0.599539	0	0	0	0	1.02143	0
MSTRG.10078.1	0.377122	1.22673	2.22249	2.50964	3.24558	2.1913	1.95132	1.77337	0.722651	0.989982
MSTRG.10079.1	0	0	0.622	0.404015	0.919073	0.296459	0.440535	0.596741	1.18211	0.794239
MSTRG.10080.1	0	0	0	0	1.14136	0	0	0	0	1.69738
MSTRG.10086.1	10.3705	5.32043	5.21951	5.2385	6.27757	5.42968	7.31393	7.00448	6.74243	7.25571
MSTRG.10098.1	1.59273	2.77254	1.92857	2.2805	2.29424	1.64277	0.984334	3.47974	0.679933	1.98255
MSTRG.10099.1	1.65713	2.66795	3.38536	3.33878	3.84873	4.3241	3.18701	3.98752	4.14504	4.99169
MSTRG.1010.1	3.85133	0	1.48421	0.70765	4.26224	1.78267	6.1386	1.41805	1.4491	1.93263
MSTRG.10102.2	1.43384	1.0638	0.426928	0.620839	0.525851	0.465728	0.5902	0.638829	0.0892848	0.100423
MSTRG.10109.2	12.8346	60.8058	1.3898	0.816253	0.499837	0.814925	3.81281e-05	0.578748	0.75919	0.109039
MSTRG.10114.1	0.0658453	0.304577	0.560779	0.824439	0.892891	0.535348	1.04447	0.986485	1.95427	1.17999
MSTRG.10115.1	0.101866	0.228564	0.944212	1.03807	0.602052	0.494541	0.931995	0.4875	1.05789	0.888966
MSTRG.10117.1	7.33273e-19	4.96028e-13	6.90061e-21	37.1292	2.66438e-10	1.09546e-15	1.09017e-16	3.35324e-16	2.61782	2.31115e-13
MSTRG.10118.1	0.782915	2.4843	14.9571	25.0399	6.20588	8.12777	6.41837	18.8844	14.3039	13.2731
MSTRG.10118.2	3.9677e-29	2.04025e-53	1.36511	8.38995e-21	3.17936e-40	0	9.50667e-74	1.19878e-22	0.431187	0.377921
MSTRG.10125.1	0	0	0.625823	0	0	1.01225	1.95267	0	0.468685	0
MSTRG.10126.1	0	0	0.919827	0	0	1.01394	0	1.34523	0.391269	0.656538
MSTRG.10128.1	14.59	17.7383	28.921	20.4945	40.9836	24.9234	28.741	9.68491	96.4592	12.7533
MSTRG.10132.1	0.17892	0.192216	0.354958	1.7313	0.641849	1.13051	1.88839	1.1066	2.21799	2.2899
MSTRG.10138.1	0.479138	0.575942	0.97658	0.781048	0.569009	0.892466	2.66434	1.56156	1.82869	1.23406
MSTRG.10138.2	4.8728e-10	0.0117313	1.25565	1.06241	1.22102	0.248432	0.351727	0.495787	0.25047	0.980613
MSTRG.10138.3	0.104394	0.174932	0.000149775	0.998408	0.174104	0.561307	0.883057	1.08988	1.60209	0.482402
MSTRG.10138.4	1.07958	0	0.469968	2.23897e-09	0.919006	0.558977	1.32625e-17	1.57921	6.12679	0.822073
MSTRG.1014.1	0	0	1.25373	0.608137	0.418351	0.330328	1.65593	1.05144	0.714766	1.73663
MSTRG.10170.1	7.40428e-05	2.26964e-06	0.538942	1.32064	0.000150105	0.363211	0.926157	0.000448859	0.233676	0.374847
MSTRG.10171.1	2.25023	2.94434	6.98831	3.39483e-123	0.626585	1.24737e-42	1.10783e-287	2.53766e-121	2.39305e-76	5.46453e-43
MSTRG.10173.1	0	0.621856	0	0.531348	0.777863	0	1.73189	1.58215	1.68567	0.585999
MSTRG.10182.1	2.99938	2.0283	4.90697	5.85613	2.46265	2.2824	4.9595	4.18966	3.72075	4.5903
MSTRG.10186.1	0	0	0	0.192117	0.451125	0.308981	0.419011	1.13456	0.149749	0.615532
MSTRG.10189.1	0.219468	0	0.869039	0.423186	0.721617	1.3038	1.38417	1.35545	1.97719	1.19941
MSTRG.10195.1	6.73726	12.5795	18.752	11.7453	11.0978	12.0326	15.4977	13.5686	13.4649	10.9015
MSTRG.10203.1	0	0	0	1.22005	0.139894	0.497089	0.664426	0.603686	0.481515	0
MSTRG.10207.1	0.896608	3.20639	0.5938	0.434951	0.0767907	0.608248	0	0.0714711	0.112427	0
MSTRG.10208.1	0.870072	2.26431	0.370897	0.483473	0.256059	0.36035	0.13191	0.119167	0.0926288	0
MSTRG.10209.1	3.70998	18.4702	2.84517	1.79662	3.47148	2.64963	1.78168	1.12471	4.31827	1.59292
MSTRG.10216.1	2.26415	0.542363	0	0	0	0	0	0	0.0964188	0
MSTRG.10217.1	0	0	0	4.03176	0	2.71364	6.45878	2.11608	1.997	0.707448
MSTRG.1022.1	0	0	0	0.634433	0.635055	0.358582	0	0.321377	1.24172	1.13663
MSTRG.10223.1	16.8026	7.9413	5.66026	5.94439	7.40662	8.36628	6.18453	7.9501	11.2043	11.7349
MSTRG.10225.1	0.502516	0	0	0	0.909195	1.23618	0	0.47346	0.918518	0.818676
MSTRG.10228.1	0	0.209245	0.26817	0.304203	1.20566	0.454153	0.00206305	0.0978562	0.615193	0.267633
MSTRG.1023.1	0	0	1.47769	0	2.13905	3.11949	7.36727	4.32431	17.7397	12.6391
MSTRG.10237.1	0	0	0	0	0	0	1.32763	0	0	0.444366
MSTRG.10244.2	11.5766	8.77692	6.41768	6.75298	7.71124	7.94108	7.84746	8.19408	6.52817	9.03074
MSTRG.10259.1	0.63332	1.3628	1.88163	2.03685	4.25917	2.73432	3.1093	3.4119	1.83164	2.34485
MSTRG.10261.1	3.82086	3.47266	18.3191	8.78882	9.98483	6.41131	5.28822	1.60308	12.6991	2.39369
MSTRG.10265.1	0	0.474659	0	0.412837	0.791665	1.1358	0.898248	0.618041	0.329893	0
MSTRG.10272.1	2.17139	2.34282	3.48398	4.68848	6.06882	5.97317	4.54137	5.78234	0.617528	2.42535
MSTRG.10272.2	8.09251	3.19296	1.78078e-96	0	0	3.36552e-68	0	4.3047e-89	0	0
MSTRG.10274.1	17.0239	9.29739	0.51856	0.498921	0.761243	2.2682	0.542261	2.73663	0.194195	4.21577e-232
MSTRG.10276.1	0	2.86386	2.14165	0	0	5.74962	2.07001	2.02726	1.09697	3.98699
MSTRG.10290.1	1.4998	0	1.39517	0	0	1.59526	5.587	0	0.522164	1.39108
MSTRG.10295.2	0.28479	0.916304	0.990545	0.414725	0.573899	0.329564	2.11179	0.678579	4.52568	1.06565
MSTRG.10298.1	0.164465	0	0	0.318699	0.554386	0.476963	0.521503	0.548766	0.430992	1.29001
MSTRG.103.1	0	0	0	0	1.04471	0.539357	0	0.527464	0.927928	1.21412
MSTRG.10301.1	0.0562114	0.300231	1.14607	0.77	1.34349	0.91155	2.34264	1.02866	1.90287	0.574946
MSTRG.10302.1	0.278493	5.3338e-06	1.334	1.33001	1.04003	1.0814	0.331951	0.653355	1.62809	0.484033
MSTRG.10308.1	0.362129	0.434981	1.03971	1.64044	1.11729	1.16905	1.79179	1.17224	0.884619	0.959859
MSTRG.10311.1	3.37889	2.71767	2.7984	3.96431	5.0699	4.01299	7.15983	5.97922	8.11601	6.26701
MSTRG.10325.2	5.18268	5.31025	2.22283	2.02417	3.49597	2.60249	2.85126	2.80483	2.81778	2.96356
MSTRG.10326.1	6.81201	3.74832	12.0689	5.4611	9.88095	10.7154	7.60827	10.0566	4.70958	7.96415
MSTRG.10326.2	1.10785e-76	4.4368	0	2.2283	0.8474	2.08814	0	0.945633	0.354216	0.526693
MSTRG.10334.1	8.07444	7.45824	9.34562	7.49449	7.67723	7.49491	7.06935	6.72528	7.46691	8.60058
MSTRG.10337.1	0.108835	0	0.541691	0.52991	0.320238	0.518467	0.347048	0.466783	1.68716	0.828021
MSTRG.10365.1	0	0	0	0	0.321732	0.354212	0	0.161349	0.38299	1.17176
MSTRG.10388.2	1.12828	1.58294	2.03959	1.92943	1.81587	1.53161	2.70885	1.89437	1.37831	2.76213
MSTRG.1039.1	1.19012	1.2299	5.57939	4.15415	2.7975	1.63668	5.11073	4.69111	6.66563	4.1862
MSTRG.10394.1	1.54533	1.80942	1.32085	1.7253	1.36697	1.70948	1.41294	1.76564	1.79789	1.87196
MSTRG.1040.1	0.423563	0.460269	3.73568	0.401023	1.7223	1.67175	2.18164	2.18582	3.65128	2.90081
MSTRG.10407.1	0	0.955504	0.658949	0.6417	0.940272	1.28773	1.39923	1.68584	1.16218	1.69319
MSTRG.10408.1	0	0	0.474224	0.457078	1.33317	0.435322	1.49104	1.13691	0.379043	1.23831
MSTRG.10409.1	0	1.10806	0	2.68442	1.29093	0.965941	1.93641	1.78429	0.354135	0.625122
MSTRG.1041.1	0.215206	1.6289e-60	1.91778	0.695407	0.0944762	0.624384	1.035	0.558713	2.11545	0.698533
MSTRG.1041.2	0	0.571682	3.90952e-12	1.30211	0	0	0.762078	0.131733	0.561606	1.12784
MSTRG.10410.2	1.783	1.18279	0.908614	1.75277	1.56708	1.26439	1.1924	1.2403	0.837558	2.55389
MSTRG.10415.1	0.618124	1.40067	3.0969	2.6835	3.15429	2.35437	3.85431	2.96372	3.88414	4.08382
MSTRG.10415.2	0.249542	0.0353502	0.812997	0.946482	1.11666	0.719227	1.97399	1.18661	2.25508	2.38384
MSTRG.10423.1	1.18559	5.32577	5.74772	5.54914	6.37276	5.13517	4.8942	4.1473	6.35264	4.49278
MSTRG.10430.1	0	0	0.057327	0.112395	0.459538	0.166437	0.245498	0.11018	1.43275	0.349643
MSTRG.10431.1	0	0	0	0	0.27627	0.141463	0	0	2.00291	0
MSTRG.10432.1	0	0	0.281021	0	0.124285	0	0.449365	0.0676708	1.27559	0.384575
MSTRG.10434.1	0	0	0.493308	0.120571	0.445431	0.440337	1.57904	0.827388	0.651887	0.717557
MSTRG.10435.1	0	0.300682	0.557336	1.03564	1.05726	1.24803	1.0398	0.406132	1.5806	1.08273
MSTRG.1044.1	0.182175	0.11071	0.362099	0.288685	0.644268	0.651279	0.261888	1.01773	0.578483	0.592318
MSTRG.10442.1	0	0	0	0.901554	0.418283	0.498334	2.45098	0.895427	0.746761	0.476325
MSTRG.10443.1	0	0	0	0	0	0.961073	0	1.56483	0	2.24265
MSTRG.10449.1	6.7203	0	4.02591	0	0	0	0	0	0	0
MSTRG.10452.1	2.39468	0.593831	0.548024	0.356321	0	0	0.194316	0	0	0
MSTRG.10454.1	1.65903	2.70308	0	2.35794	1.94874	2.7532	4.27626	2.92063	2.66758	4.68323
MSTRG.10458.1	0	3.01698	2.65294	1.9033	0	0.9211	0	1.58952	0.544069	0
MSTRG.1046.1	0.00498375	0.00526631	0.00502273	1.79762	0.00273147	0.00480771	0.00542056	0.00486085	0.0174122	0.00502482
MSTRG.10463.1	1.87617	0.686084	0.606806	1.16353	1.47069	0.653407	3.15858	0.28674	0.701399	2.29016
MSTRG.10471.1	4.28826	0	0	0	2.73628	3.04566	1.88809	0	2.40968	1.40251
MSTRG.1048.1	0.575649	0.270406	3.19519	1.60715	1.99999	1.65643	1.44201	1.95823	2.51056	2.04806
MSTRG.10481.1	0.281972	0.755982	1.40116	1.36891	2.05795	1.74638	1.49371	1.41255	1.16556	1.75336
MSTRG.10485.1	0	0	0	0	0	0	0	0	2.83315	1.4149
MSTRG.10494.1	3.81068	0	6.40586	0	3.11405	3.22939	2.98336	0	13.57	2.46051
MSTRG.105.1	4.65698	3.6419	0.751096	0.734256	0.859993	1.63471	1.33553	1.19967	1.37655	2.23767
MSTRG.10518.1	0	0	0	0.894807	1.80989	1.3306	0	1.76381	2.4836	2.51191
MSTRG.10519.1	0	0	0	3.36857	0	0	0	0	6.65254	1.13492
MSTRG.1052.1	0	0	0	0	2.52769	0	0	0	4.64684	0
MSTRG.10522.1	0	0.349707	0.955294	1.23542	1.66838	1.32886	0.336383	0.76365	1.45258	1.37514
MSTRG.10540.1	0	0	0	0.423531	0	0.233344	1.84282	0.843271	0.667523	1.38306
MSTRG.10543.1	0	0.857714	0.74766	0	0.377953	1.79653	0	0	0	0
MSTRG.10545.1	2.28795	0.082649	0.370876	5.7391e-27	3.79054	1.24198e-14	5.34381	7.88694	1.20716	2.51694
MSTRG.10545.10	4.78612e-169	9.78941e-79	1.34587e-129	2.89086e-92	4.06433e-53	3.24927e-42	2.59439e-22	0.514746	7.45056e-39	1.26713
MSTRG.10545.11	8.18967e-67	7.35782e-18	1.22467e-223	1.61321	1.67544	1.48363e-58	0.390621	5.61327e-47	0.311247	3.80909e-23
MSTRG.10545.12	7.01066e-176	5.53729e-105	6.27677e-80	1.01839	0.656913	1.33071	2.35901e-80	0.375438	3.45871e-127	0.227434
MSTRG.10545.13	0.996747	2.17485	0.919139	3.37124	2.7977	4.52244	4.8774	5.50415	0.47719	2.95872
MSTRG.10545.15	4.01194e-57	4.52161e-11	2.84157e-241	1.92515	5.98252e-12	0.345479	6.73338e-119	2.1869e-31	3.82745e-38	0.331643
MSTRG.10545.16	3.8531e-140	2.44962e-82	6.50061e-301	1.37506e-198	2.14267e-81	3.52955e-236	8.52054e-237	3.7679e-137	1.07468e-53	1.7453
MSTRG.10545.17	2.64756e-142	3.75382e-89	2.0724e-48	0.921131	2.06485	0.788204	4.12859e-61	1.54911	0.122066	3.08369
MSTRG.10545.2	8.78572e-45	1.89877e-31	0.000309629	1.81726e-33	2.50375	5.72805e-18	2.16901e-17	0.00398043	3.7195e-109	0.634431
MSTRG.10545.21	1.33527e-10	1.89061e-05	8.59744e-22	0.851709	7.28864e-05	0.927437	1.73533	2.25e-16	1.14574e-30	0.0925737
MSTRG.10545.22	0.886085	0.351601	2.05271e-10	0.00531713	3.07398	0.415064	9.49212e-44	0.0480141	0.0318755	9.21972e-10
MSTRG.10545.24	1.00733	2.05522e-07	1.84067e-160	0.476132	1.25147	3.68518	1.58832	5.03955	0.335538	2.23826
MSTRG.10545.26	1.70823	1.10071	1.10073e-33	2.95035e-11	0.35258	3.05796	4.78232e-37	0.454375	0.429409	0.943605
MSTRG.10545.27	2.4563e-06	1.68602	0.00649786	1.85422	1.00028	0.677932	1.45401e-31	2.46693e-06	3.96046e-30	0.84505
MSTRG.10545.28	1.23502	0.805741	2.36932	2.70455e-06	1.91425	0.958848	0.332882	1.85864	0.215593	0.189998
MSTRG.10545.4	3.37667e-14	3.52576e-12	4.24375e-09	3.47623e-12	8.73626e-12	0.283685	8.34017e-39	2.89936	1.42261e-34	1.84099
MSTRG.10545.5	2.2611e-217	3.12661e-104	0	7.32522e-149	9.46807e-111	4.37869e-129	0	2.25813e-155	2.94413e-90	1.24501
MSTRG.10545.6	3.28634e-08	1.10146	8.30708e-28	1.95264	1.5569	1.34356	0.824023	1.22818	5.40662e-36	2.95586
MSTRG.10545.7	1.19785e-46	6.34618e-32	3.4643	5.2359e-175	0.794907	2.51054	1.4324	1.88175	8.04717e-40	4.18375
MSTRG.10545.8	0.00030216	6.78469	2.77903	7.7764	3.86599	11.7245	9.03695e-09	13.8621	0.953241	9.46599
MSTRG.10545.9	1.98463e-46	2.6504e-32	0.00141446	1.01069e-185	0.0126155	0.318568	3.40938e-20	2.90585	3.85865e-110	1.08449
MSTRG.10549.1	1.37245	1.51616	0.786417	0.575968	1.10722	0.916969	1.46551	1.31689	0.866345	1.06725
MSTRG.10554.2	0.683283	1.94037	4.68445	3.81147	3.07289	2.89971	3.78841	3.80682	4.16753	3.19348
MSTRG.1056.1	0.322289	2.78848	1.58709	1.23154	2.06493	1.63654	0.335331	1.67421	1.70702	1.87607
MSTRG.10575.1	0.630322	0.340738	0.310508	0.903801	1.00991	0.915155	0.656291	1.04238	1.29971	2.426
MSTRG.10579.1	0	0	0.395352	0	0	0.419153	0.41601	0.376857	1.04833	0.682267
MSTRG.10585.1	0	2.59135	0	1.79495	0	1.17794	1.92188	0	1.72447	2.86775
MSTRG.10596.1	0	0	0	0	0	0	2.75748	3.82563	1.09553	1.96146
MSTRG.10598.1	0	0	0	0	0	0	0	0	1.71709	1.10034
MSTRG.10599.1	1.24089	1.32387	1.47093	1.41532	2.06706	2.0069	2.28834	1.96912	2.28527	2.28851
MSTRG.1060.1	2.19918	2.71719	3.09546	1.80207	0.296829	3.35368	0	0.594306	1.28582	1.74974
MSTRG.10600.1	0	1.61215	0	0	0.653785	2.64117	0	0	6.32786	1.30542
MSTRG.10601.1	0	0	0	1.82597	0.530091	0.771892	0.795	0.180012	0.439111	0.340711
MSTRG.10603.1	0	0	0	3.28922	0	1.05908	0	0	0	0
MSTRG.10605.1	0	0	0	2.10195	0	0	0	2.21271	1.23134	0.735503
MSTRG.10606.1	1.13994	1.28174	1.07879	1.01515	2.55636	0.508829	3.29071	3.08427	4.63853	2.11479
MSTRG.10612.1	4.72357e-187	4.71753e-152	11.7109	1.50621e-59	7.27535	5.82423e-75	9.4903e-197	0.51918	0.400441	1.0277
MSTRG.1062.1	0	0	0	0	0	0	0	1.05493	0	0
MSTRG.10629.1	0	0	0	0	0	1.25103	0	0	4.05419	0
MSTRG.10637.1	7.78763	3.20866	0.468974	0.428432	0.240861	0.442309	0.125135	0.451725	0.00014602	0
MSTRG.10638.1	1.72906	0.343842	2.30275e-06	0.152682	0.258196	0.494355	0	5.84753e-07	0.0461604	0
MSTRG.1064.1	0	0	0	0	0	0	0	0	4.47493	0
MSTRG.10642.1	0	0	0	0	0	0	4.3938	2.16337	1.19521	3.85834
MSTRG.10643.1	0	0	0	0.642745	0.643584	0.933879	0	1.28512	5.35741	1.09456
MSTRG.10645.1	0	0.308672	0.962901	1.52323	1.25533	1.53588	1.24346	0.966158	0.832441	1.53318
MSTRG.10649.1	2.73287	1.79217	1.46951	3.58357	2.67902	4.14702	5.56329	3.30941	2.67987	3.97002
MSTRG.10659.1	0.328388	0.176275	0	0.795457	0.517109	1.00372	0.694212	1.4875	1.54099	0.545392
MSTRG.10667.1	11.8228	12.1037	10.1142	6.56707	7.77682	7.52044	7.73023	10.6943	8.42607	9.99874
MSTRG.10668.1	0.844124	0.702551	1.30807	1.09749	1.6754	1.40138	1.69736	1.30088	2.01433	1.71063
MSTRG.1067.1	4.19298	3.28211	8.96245	0.558577	1.14956	0.312799	0	0.281497	25.0803	0.55944
MSTRG.10674.1	3.44712	0	0	0	4.26745	0	0	0	0	0
MSTRG.10679.6	0.000502386	1.14685e-96	3.72269	4.1675	2.52125	3.19907	1.53522	2.01792	0.526679	3.51557
MSTRG.10690.1	5.99044	7.76218	2.389	5.9978	5.50062	3.02654	5.82016	4.35779	4.45022	4.27657
MSTRG.10690.2	10.8298	10.5334	12.8258	5.00094	8.24535	8.28728	6.97149	9.4707	12.91	8.95042
MSTRG.10694.2	3.7544	7.12855	6.01242	3.00294	1.62156	2.98026	1.50368	1.23364	0.961999	1.02925
MSTRG.10695.1	0	2.43557	0	0.678295	0.680124	0	0	1.34754	0	1.15936
MSTRG.10700.1	0	0	0	1.82837	0	0	1.9569	0.899873	0.75295	3.08403
MSTRG.1071.1	0	0.472548	0	0.411106	0.407994	0.873443	0.44725	1.21833	0.487875	0.428581
MSTRG.10713.1	0.913688	0.595797	1.91071	0.939169	1.24849	0.948759	1.36559	1.06258	1.71224	0.799492
MSTRG.10732.1	0	0	0	0	1.01411	0	0	0.470996	0.758528	1.39301
MSTRG.10738.1	1.45452	1.12235	0.616788	0.000148971	0.452297	1.57449	3.25149	1.34024	3.83075	0.414296
MSTRG.1075.1	0	0.220079	0.202703	0.395066	0.194475	0.289764	0.430798	0.389078	1.00151	0.332498
MSTRG.10750.1	1.39247	1.88192	0.896773	1.18352	1.84453	1.89539	1.49182	1.29348	1.82538	1.67257
MSTRG.10751.1	5.30011	5.54706	3.42226	4.9279	5.67303	5.87848	5.49519	4.46231	6.90529	6.53102
MSTRG.10757.1	101.21	211.931	428	881.476	265.768	252.61	356.764	461.299	138.333	253.779
MSTRG.10758.1	0.535198	0.430325	10.1842	9.4754	33.6211	34.9466	32.3716	31.2781	21.2166	27.1428
MSTRG.10759.1	0.267599	1.37184e-101	1.38875	1.18442	7.67286	7.96999	5.22123	6.65335	1.36305	4.97431
MSTRG.10766.1	0.485399	0	1.42267	0	0.212171	0.723343	0	0.679365	0.734239	1.2228
MSTRG.10778.1	0	0	0	0	0.571246	0.186061	0	0.781257	0.644115	1.23971
MSTRG.10779.1	0	0.207611	0.191431	0.186634	0.904306	0.460219	0.203539	1.01044	0.147357	0.243927
MSTRG.10790.1	0	0	0	0	0	0	1.0538	0	0.447277	0
MSTRG.10792.3	1.59886	2.31616	1.47875	1.52947	0.791743	0.933635	1.43069	1.5075	1.30754	1.42106
MSTRG.10793.1	12.3347	0	0.910117	2.59731	3.55247	0	2.75748	3.82563	0	0
MSTRG.10794.1	3.88001	2.44795	0.636863	0	0	0.29025	0.336383	0	0	0
MSTRG.10795.1	1.88382	2.68638	5.01941	6.78858	3.35199	2.04455	7.36664	3.89822	5.63014	4.77944
MSTRG.10795.2	1.95973	3.37126	3.06795	3.21661	7.03763	7.6389	3.39436	4.96459	3.72056	3.93608
MSTRG.10798.1	0.217373	0.174137	0.596677	0.584994	0.901966	0.560165	1.27781	0.910567	2.05229	1.57491
MSTRG.10799.1	0	0	0.532386	0	0.71603	0.245002	0	1.02872	2.0365	1.23226
MSTRG.10800.1	0.0697777	0	0.208786	0.409138	0.50749	0.341676	0.670157	0.701982	1.42086	0.540395
MSTRG.10804.1	0	0	0.971522	0	0.496048	0.259211	1.52642	0.23067	0.58331	1.00039
MSTRG.10816.2	7.37731	3.4003	3.77501	1.89685	0.865801	1.51032	1.30775	1.61732	1.23898	1.16708
MSTRG.10817.7	0.490965	0.268785	0.162461	0	0.683406	0.441132	0.518979	0.913084	1.52293	0.465157
MSTRG.10831.1	34.5791	28.7884	18.0202	15.1601	17.3819	16.1217	10.1371	12.1469	4.41163	8.15471
MSTRG.10831.2	12.913	19.4326	16.0853	0.0306605	1.86859	6.37016	4.81627	4.75527	2.39713	4.76145
MSTRG.10835.1	0	1.54201	1.27094	0	2.38472	1.81387	0	3.00396	0.569562	3.41839
MSTRG.10837.1	0	0	1.27094	0	1.21491	0	0	0	0	0
MSTRG.1084.1	0.98273	0	1.87418	0.886721	1.32261	2.50783	0.959542	0.893982	0.350814	0.886071
MSTRG.10840.1	0	0	1.37596	0	0	0	1.37881	1.30858	2.28328	1.97859
MSTRG.10842.1	0	0	3.8705	0	2.78497	0.946716	1.88809	0.966389	1.44797	0.664728
MSTRG.10846.1	1.55182	1.11109	0.684367	0.834714	0.88393	0.89915	0.364205	1.14939	0.51748	1.00166
MSTRG.10848.1	2.04652	3.06422	3.1007	2.15757	1.65579	1.64204	2.53022	2.23566	0.462502	1.59788
MSTRG.10858.1	0.348971	0	1.38899	1.01878	0.333297	0.240529	0.617744	0.612532	0.435118	0.363092
MSTRG.10859.1	0.582358	0.854589	0.981809	1.28439	0.63306	0.918685	0.467674	0.645585	0.491853	0.65474
MSTRG.10862.1	0.426576	0.762491	0.282612	0.966329	1.0224	0.933051	0.903781	0.813722	0.85717	1.00703
MSTRG.1087.1	3.24641	4.39226	9.07318	13.4496	19.7868	13.5413	18.2169	15.8264	26.5612	16.4223
MSTRG.10876.1	0	0	2.99064	3.56395	1.43136	0.813554	7.72855	4.64883	1.80112	4.02287
MSTRG.1088.1	0	0	0	0.461377	0.489043	0.255351	0.501664	0.23099	1.14875	0.316425
MSTRG.10880.1	4.76135	5.92126	0	0	0	2.47121	0	4.00703	0	1.13492
MSTRG.10881.1	6.65712	3.4077	4.52774	2.5679	2.36706	2.21284	2.02786	2.08123	3.38291	3.59435
MSTRG.10886.1	0	0	0	0	0	0	1.68115	0.771045	0.817357	1.72321
MSTRG.10896.1	0	4.52729	0	0	0	0	0	1.75542	0.660301	2.52659
MSTRG.10900.1	1.23529	1.35468	1.79856	0.574944	0.269404	0.921949	0.624359	0.863516	0.93647	1.55292
MSTRG.10901.1	0	0	1.11491	0	0	0	0	0	1.9521	0
MSTRG.10902.1	0	0	3.20293	0	0	0	0	0	0	0
MSTRG.10903.1	2.52101	0	0	0	0	0	0	0.991743	0	2.60245
MSTRG.10904.1	0.40631	0	0.797015	0	0.533477	1.30498	2.93485	0.957521	0.315286	0.412633
MSTRG.10906.1	0	0	0	0	3.1191	2.4034	4.22132	0	1.94627	2.38718
MSTRG.10913.2	0.483976	0.621557	1.35625	0.244853	1.22281	0.470352	1.53375	1.00321	1.91824	1.54703
MSTRG.10914.1	0.176154	0.188449	0.614364	0.601508	0.491991	0.755814	0.750524	0.758866	1.36245	1.04101
MSTRG.10916.1	0	19.3148	0	0	5.70887	0	0	0	0	0
MSTRG.10917.1	0	0	0	0	0	0	0	5.60726	0	4.28718
MSTRG.10918.1	0	0	0	0	0	0	0	0	2.98329	0
MSTRG.10927.1	2.22894	3.75468	4.22391	3.9783	4.91323	5.15664	5.37461	5.54904	3.93512	6.45139
MSTRG.10929.1	1.42634	2.30329	4.14819	4.66041	4.1786	3.05687	5.28381	4.82353	6.79773	6.74052
MSTRG.10929.4	0.000289879	0.0225244	0.0801852	0.00134454	1.6446	0.000642823	1.30509	1.5001	2.24708	0.738175
MSTRG.1093.1	0	2.76338	5.76768	0	2.73452	7.36142	2.33717	1.06655	1.80321	4.28349
MSTRG.10932.1	0.793538	0.851707	1.89106	1.38467	1.69796	1.27057	2.5177	2.94753	2.62744	1.67968
MSTRG.10938.1	0	0	1.00296	0.946602	0.457163	0	5.11819	1.91271	0.431824	1.71279
MSTRG.1094.1	1.41488	1.02732	0.922167	0.444647	1.50228	1.12571	0	1.53419	1.56654	3.7703
MSTRG.10940.1	0.78439	0	1.80804	0.753407	1.31671	0.271131	0.821072	0.991072	2.15902	1.70356
MSTRG.10942.1	0	0	0	2.40323	0.63774	0.729802	0	1.22502	2.02382	2.13822
MSTRG.10943.1	0	0	1.16409	0.558577	0.818876	0	0.606696	0.556812	1.81608	0.203258
MSTRG.10945.5	0.390734	1.11068	0.000374286	0.000449255	1.30975	0.302885	0.00013743	0.211225	0.00496925	0.380776
MSTRG.10946.1	0.72643	0.964231	2.32866	2.5335	2.50145	2.31497	3.33883	2.53679	3.25309	3.15509
MSTRG.1095.1	0	0	2.32818	0.558577	0	0	1.82009	0	0.217957	0.203258
MSTRG.10955.1	2.0652	0.897223	1.61989	0.391422	0.983757	1.41519	0.851855	1.15974	2.33038	1.2231
MSTRG.10961.1	1.8732	0	0	0	0	0	0	0.4361	0	0
MSTRG.10962.1	0.976122	2.35326	0.242756	0.118675	0.179351	0.290649	0.12952	0.0585024	0.182702	0.130349
MSTRG.10975.1	0	0	0	1.07053	0	0.639188	0	0	0	0.412843
MSTRG.10977.1	0.620706	1.72936	2.2823	2.96253	2.51472	2.94258	3.9683	1.82241	4.75448	2.10454
MSTRG.10977.2	0.398194	0.426868	0.991968	1.22	1.82224	1.58759	1.8127	1.41378	1.47257	0.985582
MSTRG.10980.1	1.25867	0	0	0.585234	0.274452	0	0.63546	0.59093	1.39166	0.640768
MSTRG.10981.1	0	0	0	5.4771	2.78245	0.709462	0	0.674423	0	1.53003
MSTRG.10982.1	0	0	0.53524	0	0.23998	0.492694	2.23692	0.258577	1.83182	1.12651
MSTRG.10983.1	0	0.478074	0.147572	0.432395	0.849724	0.584415	0	0.496146	1.85085	0.549149
MSTRG.10987.1	0	0	0	0	0	0	0	0	3.20188	0.729072
MSTRG.1099.2	2.8307	1.96588	3.77558	5.34831	4.32446	4.51478	4.97235	3.97501	1.40128	3.81547
MSTRG.10996.1	0	0	1.02391	0.399084	0.55954	0.306985	1.30551	0.49103	1.16635	0.942918
MSTRG.10997.1	1.74034	1.17097	2.44362	2.70989	1.96227	1.95899	3.09695	2.40787	3.86906	3.22563
MSTRG.110.1	0.141235	0.377427	1.05645	1.17309	1.40552	1.08194	2.26055	1.18303	3.06549	1.87519
MSTRG.11002.1	1.36296	2.37718	4.29242	3.15403	2.88493	1.42151	3.13792	2.37353	4.31228	2.07472
MSTRG.11007.1	1.40989	0.77628	1.36268	0	0.345295	0	0	0.660579	0	0
MSTRG.11025.1	0	0.733427	1.29214	1.23687	0.581593	0	0.671262	0	0.528723	0.824295
MSTRG.11032.1	0	0	0	0	0	0.32291	1.43673	0.433024	0.0872211	0
MSTRG.11045.1	1.21468	2.50221	4.43361	5.27748	4.74633	2.58628	2.87759	3.08483	3.64638	2.88628
MSTRG.11055.1	0.261187	0.502117	0.886496	1.78955	0.857824	0.760244	0.893495	0.877748	1.14185	1.01105
MSTRG.11061.1	3.09497	3.56422	6.25974	5.03545	2.81368	2.89838	3.3012	2.91239	4.43397	4.3392
MSTRG.11061.2	3.63042	4.15668	2.63729	1.47832	1.38769	2.93784	1.92697	2.90825	3.55518	2.09344
MSTRG.11066.1	0.591987	1.29683	0	1.65686	0.774957	0.839607	4.79926	1.65127	2.86636	1.31301
MSTRG.11067.1	0	0	0	0.509281	0.809806	0.566991	1.66037	1.01364	0.624789	0.345648
MSTRG.11069.1	2.93919	2.38912	2.16623	1.04873	0.160896	0.876402	0.761133	1.03667	1.09316	0.36304
MSTRG.11074.1	0	5.46414	0	0	0	2.30374	10.0334	3.73817	6.726	5.35089
MSTRG.11076.1	0.427191	0	0.418556	0.404329	1.17613	0.889014	1.31973	1.20051	1.12509	1.15592
MSTRG.11083.1	0	0	0	3.03495	11.609	6.23596	22.8213	7.00659	20.887	22.8257
MSTRG.11117.1	0	0	0	3.65675	2.87376	2.1922	0	2.01393	7.70619	3.5292
MSTRG.11118.1	0	0	0	0	4.0724	4.3616	3.92432	1.81359	4.25982	2.48617
MSTRG.11124.1	1.00329	3.02753	3.38201	2.62262	0.900124	1.12121	3.38381	2.09476	1.23472	1.79343
MSTRG.11128.1	0.90277	0.793023	0.735755	1.31346	0.705762	0.75949	1.52858	1.72173	1.825	1.68663
MSTRG.11134.1	1.31865	4.35172	0.324922	0.621966	0.126222	0.173011	0	0.361925	1.69213e-06	1.2417e-06
MSTRG.11144.1	0.38926	0.209246	3.85822	5.64197	7.1053	4.6515	7.79367	6.85058	8.13322	9.75624
MSTRG.11149.1	1.79244	1.06694	2.33101	1.62755	1.53079	1.11083	2.35884	2.00229	1.27614	2.0841
MSTRG.1115.1	0	0	0	0	0	0	0	1.27049	0	0
MSTRG.11157.1	0	0	0	0	0	0.69945	0.720901	0.327514	1.06793	1.37856
MSTRG.11164.1	0.0750262	0.481286	0.822914	0.58627	1.04252	1.08208	0.96024	1.00669	0.988576	0.882484
MSTRG.11165.1	0	0	0	0.734125	1.127	1.07562	0.795794	1.84687	0.898087	1.86855
MSTRG.11167.1	5.45267	1.35621	3.72363	1.06741	1.99414	2.78757	0.626428	3.68259	5.65341	2.65713
MSTRG.1117.1	0	0.380304	0.175606	0.513947	0.259242	1.14956	0.560592	0.589845	0.0674481	0.171517
MSTRG.11177.1	0.9366	3.42241	6.50066	7.60709	9.80175	5.2852	5.53107	7.84373	4.15877	9.22972
MSTRG.11186.1	0	0	0	0	0.858959	1.08101	1.79348	2.73357	2.26319	1.90973
MSTRG.11187.1	0.713766	1.5464	1.40355	1.01966	0.985451	0.691113	1.11017	1.00897	1.7327	1.50104
MSTRG.11195.1	0	0	1.16178	3.84437	0.705775	2.94154	1.19314	0	0	0
MSTRG.11196.1	0	0	0	1.76273	0	0	0	0	0	0
MSTRG.11202.1	0.748295	1.76618	1.93272	3.77516	3.54459	2.5773	1.74263	4.13901	3.10318	3.45191
MSTRG.11206.2	6.19594e-07	6.1703e-07	0.296061	0.676145	0.87651	0.26652	0.804136	0.819335	1.49667	0.931871
MSTRG.11209.1	4.4802	10.6195	0	0	0.971398	0	0	0	0	0
MSTRG.11210.1	0.627838	0.505354	0.935198	0.913086	0.74787	1.33344	0.830135	1.19644	2.24332	1.52442
MSTRG.11217.1	12.897	14.05	14.4997	16.61	17.7827	15.7443	14.0411	14.3968	18.0342	16.9458
MSTRG.11221.1	0	0	0	3.85633	0	0	0	0	0	3.65202
MSTRG.11224.2	2.07317	1.25942	1.10569	0.713992	1.61762	1.69247	1.14837	1.21878	3.58326	1.98611
MSTRG.11229.1	0	0	0	0	0	0	3.55672	2.00352	4.30269	4.14423
MSTRG.11230.1	0	5.68576	0	0	0	0	0	0	0	0
MSTRG.11233.2	0	0	3.72647	0	1.75198	4.0257	0	0.83769	0	2.58352
MSTRG.11234.1	0	1.03231	0	0	0.414339	1.13107	0.485753	0.663743	0.358329	0.300905
MSTRG.11237.1	0.668702	0.719864	1.76496	0.429673	0.700856	0.331063	0.468448	0.317605	0	0.381607
MSTRG.1124.2	322.612	241.61	211.51	468.217	431.909	432.374	493.941	343.524	488.115	384.903
MSTRG.11242.1	0	3.02048	2.23664	2.01588	1.06428	1.35682	0	1.12434	5.74438	0.867482
MSTRG.11243.1	2.91205	4.9877	1.35727	2.527	2.59449	4.14004	1.36131	2.58194	6.2944	3.75997
MSTRG.11246.1	0	3.70762	0	7.05625	2.54143	1.31915	0	0	3.87105	6.10898
MSTRG.11248.1	1.07112	1.44436	0	0	0.117457	0	0	0.126947	0	0.0788568
MSTRG.11249.1	1.4646	2.78582	1.62891	1.9357	1.04418	1.11316	1.48923	1.16922	1.98717	1.55069
MSTRG.11249.2	1.48613	1.70153	1.1364	0.673584	1.71472	1.63676	2.43041	2.12653	0.373255	2.13474
MSTRG.1125.1	2490.2	1177.49	583.287	1309.32	1399.47	1535.26	535.893	761.715	1393.9	1227.18
MSTRG.1125.2	0.016218	0.0288688	0.0756178	0.01664	0.010167	0.0185075	279.968	0.0173941	0.125584	0.0145893
MSTRG.11250.1	0.21767	0.69926	0.216676	1.48375	1.03144	0.814887	0.745768	1.09159	1.2661	1.78454
MSTRG.11250.2	0	1.68781	0	1.33243e-06	0.000864636	1.11866	1.34379	5.91403e-06	3.64675e-07	1.89786e-06
MSTRG.1126.1	2.37143	4.16266	5.84649	1.703	3.19327	2.295	5.56588	2.66239	10.2061	3.71048
MSTRG.11262.1	0	0.713727	0.62977	2.4129	1.77277	0.630744	0.654864	1.50179	0.49293	1.21704
MSTRG.11264.1	4.37774	3.43042	1.82042	1.16353	0.581145	1.44748	1.26343	0	0	0
MSTRG.11265.1	0.973157	0.701724	3.1945	0.619661	0.306312	0.314005	0.674883	0.306272	0	0.301063
MSTRG.1127.1	0	0	0	0	0.953601	0	1.92188	0	0	1.3888
MSTRG.1128.1	0	0	0	0	1.72952	0	0	0	0	2.20508
MSTRG.11280.1	0	0.334307	0.30482	1.7749	2.33369	1.75279	5.282	2.63119	3.98566	2.54832
MSTRG.11280.2	0.380087	0.518532	1.7737	4.33452	3.52546	0.620771	9.55798	3.94734	6.51389	0.944535
MSTRG.11281.1	0.202216	1.34726	1.36405	1.66698	8.36583	6.91959	7.06765	6.8024	13.0357	11.9395
MSTRG.11295.1	0	0	0	0	0.755817	0.7834	0	0	0	1.14843
MSTRG.11299.1	0	0	0	0	5.13868	1.77554	0	0	0	0
MSTRG.11300.1	0	0	0	0	0	0	0	2.55726	0	0
MSTRG.11302.1	50.0017	16.1957	5.0376	8.20562	2.2299	6.43016	2.88405	11.0106	0.295717	2.62907
MSTRG.11302.2	14.9196	1.30308e-67	0	0	0	1.17809e-21	0	2.28748e-149	0	2.06359e-114
MSTRG.11302.4	1.84736	1.5577e-22	1.26549	2.57451e-20	8.61827e-26	3.53526e-08	4.88848e-107	1.25834e-15	6.10433e-20	0.0187065
MSTRG.11302.5	0.000220719	3.43739e-05	0.000146448	3.55974e-05	0.000772163	0.865458	0.00036461	1.51284	6.53265e-07	0.000610163
MSTRG.11302.6	3.1102	1.62915	3.30929e-73	3.15559e-49	1.23982e-29	2.07441e-19	0	1.65496e-23	1.22025e-21	1.4295e-58
MSTRG.11312.1	2.80001	1.88834	1.22616	1.20239	0.771816	1.20814	1.26075	1.3901	0.793242	1.26789
MSTRG.11316.2	0	0	0.139527	0	0.152368	0	0.389399	0.0305905	1.54241	0.793566
MSTRG.11318.1	0	0	0	0	0	0.342143	0	1.78778	1.94127	0
MSTRG.11319.1	119.299	63.2932	25.1398	20.2432	28.8381	30.1535	17.6765	21.6995	20.3665	24.9723
MSTRG.11322.1	0	0	0.708457	2.30924	1.01101	1.20013	1.26018	1.75888	0.310413	1.63845
MSTRG.11334.1	0	0	0	0	5.57215	2.47121	0	0	0	0
MSTRG.11337.1	0.768767	0.549301	1.14677	2.86468	1.99374	1.20353	2.71848	2.50923	1.06177	1.83756
MSTRG.11339.1	0	0	0	0	3.12907	1.07963	2.11066	1.09883	2.25625	0
MSTRG.1134.1	0	0	0	0	0	0	0	0	0	5.14402
MSTRG.11354.1	4.1469	4.44869	2.05992	2.01193	1.40101	0.945591	1.41119	0.848497	3.01367	1.16984
MSTRG.1137.1	0.210217	0.226167	0.624595	0.811371	0.768656	0.501004	0.221176	0.799214	1.73763	1.03892
MSTRG.11377.1	1.10153	0.510267	0.485224	0.953362	0.498092	0.767465	0.662209	0.471194	0.442357	0.446889
MSTRG.11379.1	8.18095	15.1757	0	2.98014	3.31668	4.30605	3.15433	0	7.58904	12.4078
MSTRG.11380.1	2.2266	2.02344	3.73702	3.43293	1.61656	2.1046	2.38149	1.68211	1.86056	2.28391
MSTRG.11382.2	1.88649	3.20337	6.6803	6.39147	6.45456	5.67565	6.47612	4.98954	6.4425	5.11868
MSTRG.11383.1	1.47735	0	2.75191	1.27998	1.9945	1.44311	1.37881	3.29524	0.626661	1.36191
MSTRG.11385.1	0.112096	0.0398799	0.559929	0.878953	0.830824	0.370772	1.00014	0.986551	1.48233	1.18644
MSTRG.1139.2	0	0	0	2.1699	0.767067	0.702619	0	1.45825	0	0
MSTRG.11394.1	0	0	0.254993	0.495924	1.03712	0.633167	0.810723	0.122231	0.767557	0.424615
MSTRG.114.1	0.330145	0.529658	1.31631	1.36957	2.24407	1.54029	4.48621	2.37125	2.74232	2.54641
MSTRG.11421.1	0	1.95165	0	0	0.381726	0	0	0	0.315332	0.293119
MSTRG.11422.1	1.84379	1.59874	2.53644	0.701655	0.993329	0.827348	1.90961	0.870301	5.52017	1.59997
MSTRG.11429.1	0.709999	1.00317	1.1361	0.493388	1.13321	0.548634	0.986401	1.25519	0.50046	0.777635
MSTRG.1143.1	1.991	1.72877	1.95355	2.26712	1.34971	2.40764	1.23367	1.30935	4.31931	2.10609
MSTRG.11431.6	1.78045e-152	9.20447e-84	2.91403	2.86772e-06	9.56148e-16	1.31792e-107	1.1811e-87	1.71182e-12	2.21108e-46	0.209657
MSTRG.11432.1	0	0.875061	0.790703	0.764541	1.81631	0.599964	0.41601	0.565286	0	0.11914
MSTRG.11434.1	0	0.34856	0.634838	0.307886	1.21747	0.93591	1.34132	0.914585	0.367316	0.651781
MSTRG.11437.1	0	0	0	0	0	0	0	0	0	3.77959
MSTRG.11440.1	0.247435	0.859249	1.04927	2.41978	0.627785	1.45761	0.59458	5.6712	0.747112	1.97614
MSTRG.11460.1	0	0	0	0	0	0	0	0	0	1.37527
MSTRG.11468.6	0.271253	0.172728	2.43569	2.65718	1.93627	2.06867	3.22896	0.87376	2.12264	1.51462
MSTRG.11478.2	5.63611	3.39619	1.84219	2.8562	1.53731	1.75458	2.61838	1.40349	1.28338	1.1361
MSTRG.11482.1	0.462874	1.00783	0.45272	2.18365	1.30154	0.656172	1.42498	2.38305	0.360803	2.6465
MSTRG.11484.1	0	11.8606	2.78358	0	0	0	0	0	0	1.10575
MSTRG.11487.1	7.7903	6.76271	33.6447	33.6356	28.5138	24.4054	58.4317	44.1093	50.3678	49.2461
MSTRG.11488.2	14.6882	9.19	3.87152	5.87984	8.91419	7.86906	6.5311	7.55357	10.3154	10.0192
MSTRG.11489.1	0	0	0	0.869103	1.01207	0.564769	2.5247	1.14415	2.37735	0.498652
MSTRG.11499.1	13.1167	28.9628	13.5026	20.5622	16.4864	21.3107	13.2041	13.3587	4.96988	9.03654
MSTRG.11504.1	0.465032	1.01264	1.36435	2.19341	1.71412	1.35205	1.43132	1.30351	1.03287	1.70549
MSTRG.11508.1	1.09414	1.18568	0.358446	1.04131	0	0.189503	0	0	0	0
MSTRG.11510.1	0	0	2.05415	0	1.94389	4.25998	1.99321	3.77915	9.40303	2.86989
MSTRG.11511.1	0	1.95165	1.6845	0.799966	0	1.1792	1.73304	0.819686	3.20036	1.11889
MSTRG.11512.1	0	0	0	0	0	0	0	0	0	1.93662
MSTRG.11517.1	0	0	0	0	0	0	0	1.74868	0	2.39008
MSTRG.11520.1	1.19966	2.37377	4.58817	3.66871	3.15985	2.38572	2.78535	2.80845	4.1658	3.49024
MSTRG.11522.2	0	0	0	0	0	0	0	0	1.48235	0
MSTRG.11523.1	0	0.994078	0.856702	3.25291	0.388474	0.800145	0	0.400774	0	0
MSTRG.11524.1	1.86831	0.385234	0.899553	0.455823	0.424633	0.560058	0.901167	0.83454	0.900468	0.537658
MSTRG.1153.1	0	0	0	1.09441	0.580726	0.552616	0	1.65068	0.873652	1.19513
MSTRG.11530.1	0	0.362778	2.17937	5.56246	3.43953	2.41493	3.74776	4.10386	1.14625	1.47414
MSTRG.11532.1	0.945475	0	0	2.56736	0.410229	0	1.85279	1.2652	0.38327	0.312936
MSTRG.11541.1	2.03884	1.86629	3.93048	3.28021	5.55987	4.78534	3.29452	3.18185	3.13916	6.10169
MSTRG.11542.1	0.997927	0.132679	0.903935	0.244126	0.920441	0.797633	0.97055	1.03776	0.675085	0.408315
MSTRG.11542.2	0	1.3944	0.348242	2.10668	0.543826	0.565489	1.82049	1.85256	1.25084	1.92827
MSTRG.11551.1	1.74236	1.59977	3.88875	4.64607	3.93587	3.77924	5.96079	4.66521	5.38331	5.23622
MSTRG.11556.1	14.1507	9.88196	7.94253	8.78209	6.67508	6.99751	6.66949	9.32487	10.1287	9.80681
MSTRG.11562.1	0.122917	0.131709	0.489079	1.19543	0.558955	0.52205	2.08744	1.05644	0.879592	0.88966
MSTRG.11566.1	3.17465e-84	0	0.187115	6.86967e-249	0.600852	0.309837	4.06576e-220	0	2.09128	0.139772
MSTRG.11575.1	1.50279e-18	0.924169	4.81042e-08	2.20154	0.835031	0.411477	0.69542	1.23174	1.13029	1.19058
MSTRG.11578.2	0.443875	0.808872	1.04251	1.04082	1.16827	0.832962	1.71399	1.44662	1.98669	1.42425
MSTRG.11579.1	1.08117	1.51203	3.31481	2.77713	3.28596	2.90496	3.87185	3.61404	4.78265	4.16573
MSTRG.11580.1	1.87617	0	3.03403	2.90882	1.47069	0.840579	1.89515	2.32154	0.246948	1.04027
MSTRG.11582.1	0.446148	0.395149	0.751244	1.9878	1.78876	2.49977	4.17917	2.85109	2.26107	2.60448
MSTRG.11582.2	1.27338	0.000679702	9.4722e-14	1.79944	0.0366668	7.03859e-05	0.989913	0.000167077	0.196723	0.63654
MSTRG.11583.1	1.31564	1.31235	1.58627	1.6611	1.78033	2.13113	2.87029	1.80199	1.75175	1.69244
MSTRG.11584.1	0.852023	0.521664	1.7438	1.40761	1.4165	1.57309	3.38073	2.58176	2.4904	2.77937
MSTRG.11584.2	2.13821e-27	9.61171e-50	0.000384009	1.0414e-05	0.13795	1.1862e-11	1.07904	1.13863	0.197689	1.10852
MSTRG.11586.1	0	0.465205	0.855999	0.833783	1.56475	1.46322	1.13636	0.718835	0.490755	0.814968
MSTRG.11588.1	0.82093	0.843214	0.662888	1.23724	0.453345	0.311914	0.743872	0.733614	1.09458	0.162991
MSTRG.11590.1	0.1616	0.17282	0.483264	0.788819	0.213288	0.364799	0.602893	1.04218	0.548971	0.566636
MSTRG.11591.1	0.664779	1.35597	1.80915	2.42348	1.53975	1.71831	2.64665	2.2306	2.66208	2.743
MSTRG.11592.5	0.428817	0.30628	1.33534	1.53775	0.951165	1.17913	2.05729	1.69304	1.13828	1.34455
MSTRG.11593.1	3.68253	9.06375	3.11064	2.73886	0	0	2.90427	4.27823	1.15837	0
MSTRG.11594.1	2.17139	0.292852	0.803996	0.260471	0.790058	1.21862	0.851507	0.770909	0.717911	0.411488
MSTRG.11596.1	2.79549	3.83569	2.00916	0.244257	0.129396	0.395239	0	0.241044	0	0.149619
MSTRG.11597.1	2.82577	0	0	0	0	0	0	0.265791	0	0
MSTRG.116.1	7.60114e-17	2.22847e-12	3.67534e-19	3.01917e-62	1.94002e-17	1.46054	3.14664e-21	2.06844e-09	1.60114	0.4398
MSTRG.116.10	0.616271	1.61453e-14	0.511215	1.38658	0.725346	0.211961	0.38189	0.752433	0.479886	0.329251
MSTRG.116.11	2.58576e-17	9.24624e-11	1.33828	0.654557	0.186035	1.17239	0.893779	2.11133e-19	5.20191e-37	4.39958e-08
MSTRG.116.13	1.54725e-08	9.64212e-09	1.97431	4.87403e-26	4.32301	1.11872e-08	0.00171638	0.227744	2.78807e-10	0.0122677
MSTRG.116.15	0.384368	0.000106061	0.00796654	3.1805	2.48662	1.88919	4.20223	0.661904	2.4436	2.95466
MSTRG.116.2	2.15425e-09	6.66718e-08	1.46057e-09	6.86065e-45	0.954933	2.42365	1.12747e-16	0.33367	0.361652	1.17633
MSTRG.116.3	2.67053e-14	9.41923e-11	1.44285e-13	2.57495	0.522956	0.278912	9.83583e-15	0.000686717	1.57074e-22	0.0259147
MSTRG.116.4	0.000202711	3.56958	2.41342	0.00178622	1.82767	2.54265	1.28194e-12	0.398363	1.02349	0.257961
MSTRG.116.5	1.34123e-12	2.7182e-06	3.34418e-10	3.85873e-15	0.213214	1.73402	1.48756	0.000332888	1.15804	0.988579
MSTRG.116.6	3.24298e-23	1.04503	2.3418	0.665952	0.721524	0.901893	0.627439	0.821191	0.202642	1.19984
MSTRG.116.7	0.756165	1.05346	1.88789	1.00122	0.933059	3.05288e-11	3.51409	0.224359	1.76824e-17	0.212749
MSTRG.116.8	1.35922	2.27529	2.61472e-11	5.73552	3.94646e-06	0.0125536	2.84375e-07	0.95753	0.21971	0.38534
MSTRG.116.9	4.00263e-12	1.7167e-12	1.2478e-12	1.36111	0.000306216	2.38186e-09	1.89396e-18	0.956364	7.60052e-26	2.28009e-08
MSTRG.1160.1	0	0	0	0	1.42248	1.83698	0	1.49825	3.28659	0
MSTRG.11600.1	1.60616	1.04134	2.7396	3.06684	2.14963	2.13694	2.42299	2.99041	2.2373	1.85488
MSTRG.11607.1	0	1.00308	0	0.434794	0.20147	0.239872	1.41869	0.217292	0.854668	0
MSTRG.11608.1	0.258081	0.556565	0.76498	0.991847	0.357801	0.499365	0.810723	1.10067	0.382053	0.500594
MSTRG.11609.1	0	0	1.82918	0	1.71792	0.891248	0	2.5581	0	0.594034
MSTRG.1161.1	0.672841	0	0	0.320982	0.147403	0.150987	0	0.635799	1.2626	1.25518
MSTRG.11610.1	0	0	3.40198	0	0	0	0	2.92033	0	2.02961
MSTRG.11611.1	0	0	2.87049	0	0	0.823119	1.43408	1.41658	0	1.48093
MSTRG.11612.1	0	0.878993	0.76484	0	1.89124	0	3.94966	1.46124	2.16379	1.8213
MSTRG.11617.1	0	0	0.577881	1.12235	0.385333	0.303976	1.83413	0.555133	1.20374	0.981027
MSTRG.11624.1	0	1.43774	3.58479	1.11938	0.548421	2.93876	2.41612	1.17266	2.03536	3.7147
MSTRG.11625.6	0.343662	0.184539	0.170507	1.33101	0.541046	0.599021	0.181486	0.737455	0.322508	0.738361
MSTRG.11639.2	1.02754	0.470299	1.71927	1.22179	0.853335	0.775495	0.972119	0.418319	1.76502	1.16178
MSTRG.11644.1	0.919336	0	7.91399	0	0.399055	0	0	0	31.3651	0
MSTRG.11646.1	0.615924	0.673354	1.12058	1.40392	1.02639	1.02943	2.05809	1.64089	1.87088	1.83541
MSTRG.11648.2	0.158413	0.233309	0.843194	0.727903	0.270928	0.21959	1.15093	0.5808	0.710043	1.1595
MSTRG.11649.2	0	0.0964479	0.269458	0.351729	0.37763	0.301788	0.383999	0.561489	1.32714	1.01258
MSTRG.1165.1	3.5615	4.37523	0	0	2.88153	1.51994	0	0	3.96949	4.51115
MSTRG.11653.1	0	0	0	0	0.426138	0	1.91908	1.35099	0.399609	0.64777
MSTRG.11654.1	0	0	7.73343	6.73714	7.46611	10.3215	10.6702	4.00703	18.2946	6.71122
MSTRG.1167.1	0	0.238876	0.439299	0.2139	0.51884	0.214622	0.699614	0.210772	0.586239	1.50738
MSTRG.11671.1	0	0	0	9.78975	0	0	0	0	0	1.38335
MSTRG.11673.1	4.02904	2.9593	2.40563	2.24068	1.30199	1.72805	2.81245	2.80719	2.55785	4.0822
MSTRG.11674.1	0	0	0	0	1.0145	0.372123	0.427626	0.38956	0.161029	0.80069
MSTRG.11676.1	5.48134	4.23741	3.23413	4.05509	2.77819	3.43911	3.02269	3.49559	3.90023	4.52906
MSTRG.11680.2	0.417889	2.37011	5.27817	5.28992	3.9778	2.88093	6.28741	3.80494	2.91552	5.74235
MSTRG.11685.1	0	0	1.44136	0.687806	0	0.391309	2.9839	1.37735	0.837663	1.46005
MSTRG.11692.1	0	0	0	0	4.06462	0	4.14002	0	0.800854	0.746921
MSTRG.11693.1	0	0.34856	0.317419	0	0.282487	0.334626	0	0.152564	2.31212	0.931067
MSTRG.117.1	1.7981	1.49854	2.98045e-113	0	2.03472	3.66398	3.27748e-133	2.25585	9.53744	5.50186
MSTRG.11706.1	0	0	0	0	0.255317	0	0	0	1.27796	0.403958
MSTRG.1171.1	0	0	0	0	0	0	0	2.62459	0	1.53184
MSTRG.11723.1	0	0	0	1.49437	1.54935	1.88709	1.60571	1.53971	0.606819	1.13998
MSTRG.11724.1	0	0.878993	0.76484	1.45734	1.42347	1.24998	3.15973	0.371497	2.99105	4.32018
MSTRG.11727.1	10.133	9.32485	4.57579	7.16357	1.89136	5.16758	2.26371	3.07558	1.19674	3.35349
MSTRG.11732.1	0	0	0	0	0	8.27838	0	0	1.58669	0
MSTRG.11734.1	0	0.805702	0.705406	0	1.27266	0.981535	0	0	0.29104	0.466342
MSTRG.1174.1	30.5284	17.2038	13.7204	15.0795	21.8285	23.169	22.7628	19.3489	43.8335	21.2829
MSTRG.11743.1	0.801198	2.65897	1.54149	6.60712	1.82387	3.23744	1.59159	2.19607	1.82853	2.34206
MSTRG.11745.1	5.1593e-05	6.12318e-06	3.45386e-05	1.36223e-05	1.58315e-05	0.371623	2.26497	1.50799e-05	0.00212948	6.89129e-05
MSTRG.11746.1	0	0	0.983214	0	2.28402	0	0	0	0	1.02973
MSTRG.11747.1	0	0	1.30908	0	0.332053	0.353653	0	0.634198	0.513234	1.26649
MSTRG.1176.1	0	0	0.556109	0	0.499037	0	0.580422	1.05876	1.05774	0.928798
MSTRG.11770.1	1.74233	2.76781	2.59869	2.92726	4.73467	3.73356	3.04464	2.09383	4.95348	4.27232
MSTRG.11799.1	8.52465	18.8755	11.3885	12.9827	13.545	14.3292	11.4936	10.8771	12.1937	14.1792
MSTRG.11810.1	0	1.36396	0	2.14106	2.08942	0.639188	0	1.64513	0	0.36574
MSTRG.11812.1	0	0	2.39514	2.14775	0	1.18881	2.2904	1.05624	0	3.29644
MSTRG.11815.3	2.71676	3.69804	6.54164	6.64646	5.4937	4.82852	8.90116	8.44466	8.44698	8.07435
MSTRG.11817.1	0.941906	4.25185	5.22972	1.27491	6.5339	3.74185	3.97272	2.68833	4.26889	4.04871
MSTRG.11818.1	0	0	0	0.787131	0	0	0	0	0.347725	1.41288
MSTRG.11819.1	4.22774	16.8149	2.34893	3.04481	1.06169	2.0184	0	1.25197	0.897903	0.658455
MSTRG.1182.1	2.0567	1.50849	0	0	0.336352	0.307033	0	0.642754	0.248345	0.204298
MSTRG.11820.1	10.3112	4.38956	3.07154	3.38825	1.7672	1.90648	1.38211	1.0493	0.328667	0.604731
MSTRG.11829.1	0.891705	1.58708	0.642981	1.21253	0.779222	1.27771	0.635683	0.761111	0.429542	1.22418
MSTRG.11830.1	0	0	0	0	0.472223	0.281942	1.10123	0	0.212032	0.710366
MSTRG.11831.1	0.113414	0.485888	1.24157	1.10395	3.43588	2.28107	3.01234	4.7688	1.57667	5.56263
MSTRG.11834.1	0.361929	0.77065	5.20443e-82	0.598511	0.158388	0.491172	0.995674	0.220104	1.71436	1.13951
MSTRG.11837.1	0	0.805702	0.705406	0.673638	0.675331	1.09234	0.730726	1.34832	0.555166	1.64635
MSTRG.11838.1	0.565155	0	1.09996	1.05697	0.493433	0.253301	0.574205	1.32365	1.28411	0.527345
MSTRG.11839.1	0	0	1.29363	0.416341	0.577914	1.2485	1.81168	0	0.675492	0.862789
MSTRG.11841.1	0.393487	0.426983	0	2.24122	0.714681	0.557658	0.406545	0.185911	0	0.504789
MSTRG.11845.1	0	0	0	0	1.02066	0	1.0858	0	0.463877	0.384543
MSTRG.11847.1	6.8121	3.50862	0.958351	0.929491	1.34541	1.71562	0.337442	2.29334	1.84867	1.18822
MSTRG.11850.1	0	0	0	0	1.68863	0.694878	1.54571	0.351299	1.15012	1.48554
MSTRG.11851.1	0	0	1.22422	0	0	0	0	1.12873	0	0
MSTRG.11852.1	333.055	106.24	74.4192	58.5272	25.3746	37.7084	26.4133	51.3511	14.0749	38.0733
MSTRG.11853.1	4.24049	4.14412	4.20343	4.09816	3.42647	2.64295	1.82838	2.75163	1.45224	2.08244
MSTRG.11864.1	1.72055e-05	1.04608	0.705687	1.58095	1.03944	1.24018	1.25041	2.13085	1.24339	2.12111
MSTRG.11867.1	0	1.56872e-13	2.06157	3.28953	2.16375	3.0725	5.74292	5.64961	3.28391	2.66208
MSTRG.11883.1	0	0	0	0	0	0.508829	3.29071	0	0	0
MSTRG.119.1	1.05672	1.85614	4.21465	5.4556	4.84551	4.3322	6.76206	6.14512	5.1499	7.41135
MSTRG.1190.1	0	0	2.18816	0	1.0397	1.32377	8.44264	2.19766	0	3.00044
MSTRG.11903.1	0.814278	0	0	0	0	0.364359	0.807782	0	0.326526	1.06772
MSTRG.11908.1	0.525682	0.283478	0.778906	1.26214	0.2306	1.93464	0.550191	1.36951	1.3816	1.22524
MSTRG.1191.1	0	1.44152	0.327842	1.27145	0.628695	0.967247	0.346159	0.628591	2.25515	1.08663
MSTRG.11913.1	1.03032	1.65646	1.53688	1.12668	1.02061	0.688912	0.683085	0.677982	1.69631	0.841544
MSTRG.11914.1	0	0	1.30056	0.622359	2.67181	3.06038	5.40392	3.45676	4.25314	2.40126
MSTRG.11929.1	0.249124	1.42651	1.27211	8.36049e-126	0.479122	1.27299	4.19073	1.23737	3.4436	0.134786
MSTRG.11932.1	5.23413	4.96314	9.51783	11.532	9.34643	7.01155	8.35066	9.40109	6.41609	5.3564
MSTRG.11936.1	2.61634	0.70397	0.431701	0.420465	0.41415	0.195838	0.458432	0.414266	0.0808542	0.137759
MSTRG.11937.1	0	0	0.132142	0.387426	0.652641	0.660261	0.986491	1.39462	1.55812	0.819136
MSTRG.1195.1	0.297313	0	0.87955	0	0.692669	1.8096	2.79099	1.12461	1.23524	0.294442
MSTRG.11956.1	1.10865	1.66437	3.48232	3.60806	4.63568	3.87707	3.66003	4.53888	5.67998	4.17801
MSTRG.11959.1	7.74743	12.7644	5.74039	5.9794	5.2671	5.52625	7.13358	3.6434	4.97709	5.71681
MSTRG.11960.1	0	0	0	1.04767	0.555876	1.15042	0	0.546027	1.88141	2.30291
MSTRG.11961.1	0	0	0	0	0	0	0	0	1.64408	0.297834
MSTRG.11962.1	0.865502	2.35228	1.27166	0.818782	0.623213	0.675517	0.890785	0.201795	0.336512	1.56045
MSTRG.11965.1	0.757819	0.407266	1.31481	0.91575	1.88575	1.43231	3.19594	2.52292	2.27976	3.06937
MSTRG.11981.4	3.48413	2.77349	1.73114	5.08414	5.3827	1.19701	4.62102	2.44431	2.45966	3.46052
MSTRG.1200.1	2.58548	12.4185	4.57443	6.17409	4.37087	12.6159	6.5907	8.65346	8.71521	10.7214
MSTRG.12000.1	0	0	0	0.479415	0.25409	0	0	0.953236	0	1.20811
MSTRG.12001.1	0	0	1.25497	0	1.19969	0	3.79508	0	2.24416	2.05011
MSTRG.12003.1	0	0	1.98598	0	0	0	0	0	0	0
MSTRG.12005.1	0	0	0	0	0	1.07963	2.11066	0	0	0
MSTRG.12006.1	2.40087	0	0	1.93649	1.01616	0	2.07001	0	1.89783	0.681441
MSTRG.12007.1	1.79727	0.389432	2.82697	3.08034	3.06304	1.92702	4.84418	2.03473	3.12981	4.14765
MSTRG.12008.1	3.98768	3.43996	6.17413	5.93152	4.37917	5.56076	6.12119	6.67725	6.17713	4.27809
MSTRG.12009.1	2.1336	3.58582	0	0	0	0	0	0.494988	0	1.35481
MSTRG.12014.1	0	0	0.210547	0.41258	0.61012	0.693853	1.12632	0.943386	1.40733	1.05976
MSTRG.12015.1	0	0	0	0	0	0	0	0	0	1.90875
MSTRG.12018.2	2.63315	3.63205	0.981018	1.71629	3.06662	2.33055	1.45173	2.3308	3.0447	2.0826
MSTRG.12025.1	1.33445	0.733427	1.29214	1.85531	2.10971	1.54427	2.01379	1.5403	1.56373	2.9816
MSTRG.12052.1	0.276694	0.298612	0.819393	0	1.00931	1.07093	0.867586	0.131141	1.7704	0.711415
MSTRG.12053.1	0	0	0	1.8932	0	0.47146	0	0	0	0
MSTRG.12061.1	0.215206	1.15794	1.27852	1.45295	0.817704	1.36024	0.678937	2.24919	1.61663	1.5555
MSTRG.12062.1	0.82098	0.909063	1.57803	1.50196	0.356925	1.89997	0	1.13703	2.37277	0.766863
MSTRG.12064.1	0	0	0	0	0	0	0	0	0	1.43207
MSTRG.12080.2	0	0	0	0.464992	1.09684	0	0	1.44688	2.8362	2.39022
MSTRG.1209.1	0	0.577744	0.793348	0.514117	0.488554	0.795893	1.68076	0.253661	1.2109	1.67108
MSTRG.12092.1	0.413463	0.444762	1.22869	0.798168	0.891567	0.3212	1.52309	0.393061	0.631637	0.994648
MSTRG.12095.1	0	0	0	0	0	0	0	0	0.395395	1.65752
MSTRG.12096.1	0	0	1.62155	0	3.06098	0	0	0	1.82046	0
MSTRG.12098.1	1.07547	3.5249	3.14402	6.55262	3.85452	2.48923	6.02582	3.7684	5.13952	3.82814
MSTRG.12099.1	1.02843	8.88107e-23	0.00012634	0.0346873	1.01448	0.609302	1.53602	1.08509	2.06037	1.89538
MSTRG.12099.2	4.74712e-11	0.000836803	2.196	1.90669e-11	1.03417	0.507747	3.03538e-27	0.602796	0.402975	0.351521
MSTRG.12099.3	1.61705e-05	1.66272	1.96897e-13	1.47181	2.41267e-05	0.920003	0.297104	0.525719	0.999506	0.00407822
MSTRG.121.1	0	0	1.97335	0	0.931245	1.17794	1.92188	0.986271	7.55219	4.13725
MSTRG.12100.2	0	0	0	0	2.4803	0	1.7355	0	0	0
MSTRG.12105.1	0.085878	0.459313	1.02701	0.670408	1.41286	0.962736	0.823614	0.945774	1.02018	1.22025
MSTRG.12105.2	0	0	0	1.05898	4.92295e-07	0.631348	2.28519	0	1.0493	0
MSTRG.12119.8	0.46721	1.01748	0	1.32196	1.0799	0.871857	0.479239	0.65471	0.353254	0.321875
MSTRG.12120.1	2.96502	0.834025	3.46591	2.08711	2.31585	2.67392	5.22101	4.22426	3.77869	4.18779
MSTRG.12128.1	1.31464	0.355557	3.23592	1.88277	3.1907	1.97832	5.46791	3.2605	5.1666	2.4794
MSTRG.12130.1	0	0	1.84523	2.14329	3.67763	3.49646	2.33309	3.17851	12.238	2.52159
MSTRG.12132.1	0	0	0.107175	0.209698	0.767464	0.40158	0.457791	0.513878	1.62557	0.352004
MSTRG.12136.1	0	0	0	0.787131	2.75313	2.26685	0.852741	1.17875	1.89825	2.22938
MSTRG.12137.1	0	0	0	0	0.994699	0	0	0.462002	1.28072	0
MSTRG.12138.1	0	0	0	0	1.71792	2.16202	0	0	2.26319	1.3855
MSTRG.12143.1	1.02304	2.28766	4.37436	9.42726e-301	0.97324	1.25759	1.87791	2.058	0.906134	1.04856
MSTRG.12143.2	1.96546	4.38652	1.87418	2.66016	4.05623	2.71314	1.91908	3.78068	2.25127	1.26046
MSTRG.12160.1	0.055635	0.000736193	0.2507	0.36484	0.634115	0.559674	0.979687	0.807952	0.666859	1.05348
MSTRG.12161.1	0.202175	0.394343	0.620695	0.191432	1.2405	0.623832	0.931918	0.754122	1.38724	0.729163
MSTRG.12163.1	0	0	0	1.17289	3.59906	1.19321	0	0.61667	0.469728	1.28829
MSTRG.12164.1	0	0	0	0	0	2.7877	0	1.21284	0	4.423
MSTRG.12165.1	0	0	0	0	1.5654	0.979248	3.31045	2.34976	0.627144	2.37023
MSTRG.12179.2	1.57204	0	0	0.394267	0.00801124	0	0.414408	0.182431	0	0.000160412
MSTRG.12181.1	0.403026	0.875061	0.395352	1.52908	0.555361	1.04788	1.66404	1.89787	1.80161	1.56811
MSTRG.12182.1	0	0	0	2.44294	1.18477	0.294926	0.662962	0.301017	0.738348	0.448865
MSTRG.12195.1	0	1.29738	1.09057	0	0	0.608941	0	1.06759	0.475645	0
MSTRG.12196.1	1.75167	0.836983	0	0.188066	0.0996175	0.174844	0	0.0924503	0.0722628	0.065722
MSTRG.122.1	0	0	0	0	0	0	0	0	0.863571	1.59563
MSTRG.12203.1	0	0.385198	1.39863	0	1.49669	0.184739	0.368784	0.670295	0.942555	1.73636
MSTRG.12208.1	0.736102	0.674438	1.59324	1.42307	1.81299	2.8657	1.47888	2.5616	3.31301	2.43373
MSTRG.12213.1	0.97888	0.210489	0.388072	1.70238	0.77311	0.642421	2.26909	0.372471	0.892432	1.25936
MSTRG.12215.1	0	9.5012	0	4.22574	2.95079	3.22361	3.0301	2.14052	1.13974	2.76609
MSTRG.12217.1	15.8963	23.7328	19.8858	20.4028	27.9005	23.0488	19.7483	24.3582	26.2715	22.2495
MSTRG.12219.2	0.317421	0.52305	0.36082	0.465173	0.647173	1.17142	0.526059	0.238525	0.39947	0.585387
MSTRG.12220.1	0.145299	1.09097	0.349967	1.00318	1.00692	0.571237	1.00271	0.623392	3.16786	1.63447
MSTRG.12224.1	0	0	0	0	3.16318	2.15303	3.15433	0	0	1.25048
MSTRG.12225.1	7.33574	8.74296	5.20591	4.22644	10.6795	14.5553	5.86387	5.24853	5.80572	11.2482
MSTRG.12227.1	0	0	0	0	1.51163	0	0	0	0	0.605904
MSTRG.12228.1	0	0	0	0	0	0	0	0.83769	0	2.01804
MSTRG.12229.1	0.271977	0.874819	0.8111	0.396295	0.529147	0.858899	0.576595	0.844444	1.07254	1.5702
MSTRG.12230.1	1.23833	0.796174	2.09397	2.40846	2.45308	2.79127	2.49707	2.48555	3.55381	2.75859
MSTRG.12231.1	0.941906	1.01234	2.24131	2.54982	4.83925	2.68627	4.9659	3.49494	5.52977	5.63555
MSTRG.12234.1	0.886652	0.984868	0	0	2.90885	3.638	0.873577	3.99073	0	2.00878
MSTRG.12237.1	0	0	0.532386	0.511939	0.954706	0.570133	1.11266	0.771541	2.05158	0.695124
MSTRG.12238.1	0	0	0	0	0	1.39385	0	1.21284	0	0
MSTRG.12239.1	0	0	0	0	4.0724	4.94026	0	2.23591	1.58669	0
MSTRG.12242.1	2.45953	0	0	1.97539	0	0	0	0.971922	0.818144	3.7564
MSTRG.12244.1	0.717239	0.609201	0.850249	1.09818	0.358681	0.384251	0.599025	0.720331	0.735561	0.201217
MSTRG.12245.1	4.7662	2.99572	13.8361	9.45535	5.93373	4.8831	16.4186	6.03109	5.96795	2.95509
MSTRG.12254.1	2.52211	1.40119	4.96615	2.03075	1.25246	2.03084	4.69022	3.74585	3.35905	3.83252
MSTRG.12254.2	5.01342	2.58892	6.47379	11.8655	7.48937	6.30262	11.0096	9.27336	8.51542	9.48423
MSTRG.12263.1	16.3981	31.6283	21.9798	27.8839	21.7239	26.9499	11.5297	15.8598	7.88319	12.1966
MSTRG.12265.1	0	0.708664	0.21726	1.26956	1.21906	0.651899	1.38417	0.729375	1.2535	1.49083
MSTRG.12267.1	0	0	0	1.57426	1.58528	0.453371	0	0	0.310104	1.44806
MSTRG.12269.1	0	0	0	0	1.30369	0	0	0	0	0.301464
MSTRG.12270.1	0.696818	2.29027e-42	0.776108	0.671223	0.93635	1.54108	1.03187	1.09472	1.82858	1.18809
MSTRG.12270.2	0	3.80048	0	0	0	0	0	0	1.98905	0
MSTRG.1229.1	0.910941	2.02605	2.61497	2.4808	2.94069	2.32203	2.68637	3.31097	3.3471	2.70225
MSTRG.12290.1	0	3.02048	2.23664	0	0	1.10519	4.30585	0.991743	0.836156	2.35993
MSTRG.12291.4	1.54744	4.5925	1.87292	1.93905e-36	0.235491	0.566227	0	0.178682	0	0
MSTRG.12292.3	0	0	0	0	0	0	0	0	0	1.95144
MSTRG.12292.6	3.36705	0.933001	0.80817	2.3059	1.09752	0.376585	3.3315	0.392943	2.12706	1.64055
MSTRG.12293.1	0	7.02549	0	3.85633	0	0	0	0	0	0
MSTRG.12297.1	1.64848	0	1.52273	0	0.747861	0	3.0301	0	1.41918	2.08014
MSTRG.12310.3	1.8054	4.01385	1.72823	2.46007	6.65769	3.58232	1.77609	3.68682	2.38795	5.26222
MSTRG.12313.1	1.5786	0.42434	0.586668	0.190624	0.865792	0.736138	0.415761	0.657289	0.221814	0.521548
MSTRG.12317.1	19.4975	10.3003	13.0314	13.923	10.2556	11.0889	6.3461	14.4647	13.7084	17.8722
MSTRG.1232.1	0	0	0	0	0	0	0	0	5.84614	0
MSTRG.12332.1	0	0	0	1.56024	1.31226	0	0.565126	1.80455	5.49867	0.899394
MSTRG.1236.1	3.27717	2.22428	23.7012	3.49491	3.64474	3.534	6.76111	3.85079	126.965	3.13623
MSTRG.12365.1	0.521559	0.562456	0.257625	0.500989	0.741305	0.252299	1.36497	0.988521	0.682535	1.12211
MSTRG.12371.2	5.32109	3.29646	3.53392	2.54892	2.14787	1.88971	2.38496	2.76997	1.86509	2.69229
MSTRG.12373.1	0.660627	0.347531	1.78355	1.18556	0.809761	0.758322	0.411049	0.635222	2.45743	1.01627
MSTRG.12373.2	0.440473	0.491753	1.66634	1.27205	1.34446	1.02667	1.57843	1.29608	1.44279	1.37758
MSTRG.12379.1	0	0	6.59313	3.03495	0	0.329004	0	0.747259	0.0755136	0.55276
MSTRG.1238.1	0	0	0	0	2.12855	2.21037	2.15293	1.12434	3.15783	3.14492
MSTRG.12385.1	0.176559	0.746975	0.69434	1.03872	0.875789	0.677224	0.905296	0.42421	0.583882	0.532059
MSTRG.1239.1	0	0	0.776739	0	0.702441	0.361426	0	0.741917	7.96571	3.64037
MSTRG.12391.1	6.46853	7.25433	3.65152	3.13862	2.08067	1.61911	3.5802	1.61144	3.10689	2.3645
MSTRG.12396.1	2.64232	7.50644	4.7564	4.75334	12.0003	7.15213	12.2153	6.75606	15.211	6.74996
MSTRG.12398.2	0	1.39988	2.33402	3.13674	0.798767	1.31093	0	0.572558	4.74383	1.24321
MSTRG.12398.3	0	0	2.78358	0	0	0	2.62427	1.21284	2.5819	5.31315
MSTRG.12399.1	0.19054	0	0.188896	1.10509	0.348602	0.368471	1.20522	0.633899	1.07674	0.709809
MSTRG.1240.1	0	0	0.469762	0	0.210142	0.966709	2.46223	1.80263	5.87814	3.33808
MSTRG.12402.1	0	0	4.02591	1.82837	0.971398	1.20473	1.9569	4.71355	6.95324	2.75819
MSTRG.12405.1	2.84413	2.75891	2.55809	2.49977	4.79111	3.72585	4.7378	4.97586	8.57568	7.83695
MSTRG.1241.1	0	0	0	1.79495	2.8608	1.17794	0	0.883483	0.986284	1.3888
MSTRG.12419.1	3.43504	0.284999	0.521985	0.253734	0	0	0	0.125076	0.09776	0.0778045
MSTRG.12441.1	0.207879	0	0.276454	0.338595	0.783765	0.647454	0.887379	0.664456	1.17477	1.18713
MSTRG.12444.2	1.19459	0.824276	2.13373	0.000213697	0.528178	1.49683	0.000110564	0.161068	4.10414	0.769694
MSTRG.12447.1	0.750154	1.67029	3.04252	1.43595	1.76278	1.35774	1.79314	2.23991	2.72066	2.06266
MSTRG.12448.1	1.35713	1.96899	3.09878	3.41776	2.12123	0.438373	5.11168	3.3862	1.70977	5.47295
MSTRG.12455.1	0	0	0.862422	0.416341	1.37646	1.73852	1.35876	1.44431	2.30266	1.1534
MSTRG.12464.1	12.1358	3.43639	6.53592	0	0	0.286867	0.223949	0	0	0.0719099
MSTRG.12469.1	1.91214	0.699632	1.85422	2.9615	0.555847	1.57023	0.643082	0.591109	0	0.408358
MSTRG.12478.3	0.360426	0.580849	0.893749	1.74361	1.60959	1.58044	0.950895	1.20143	3.52915	2.33913
MSTRG.12478.9	0.588495	0.644481	1.71612	1.64759	1.67807	2.76765	1.19314	1.63596	3.95572	1.87951
MSTRG.12479.1	0	0.537743	0.497089	0.646856	1.22276	0.784147	0.352818	0.955534	2.26571	0.948954
MSTRG.12480.1	0	0	0	0.795542	0.605345	0	0	1.38806	1.89487	0.266416
MSTRG.12483.1	1.2502	2.68616	1.77164	1.20977	0	0.369774	0	0.17039	0	0.182075
MSTRG.1249.1	7.44623	8.38404	5.80932	9.19803	11.7491	11.0674	11.6352	10.4074	10.0377	11.8105
MSTRG.12492.1	0.561558	0.080544	0.658618	0.546796	0.508255	0.921651	1.18071	0.996459	1.45546	0.964407
MSTRG.12496.1	0.715052	0	0	1.98013	0	0	0.716088	0	0.801711	1.18508
MSTRG.12502.1	0.501878	0.540982	0.9921	1.44752	1.37431	1.2834	1.84065	0.594806	1.05135	2.09224
MSTRG.12504.1	0	0	0	0.969288	0.296797	0.152011	0.703678	0.319527	2.66699	1.67184
MSTRG.12505.1	0	0.446726	0.403338	0.389867	0.360022	0.213935	2.12121	1.54361	1.09181	1.0903
MSTRG.12524.1	3.38999	4.73128e-96	6.7076e-212	1.91293	0.778608	0.205126	1.74351	1.66294	0.607126	1.42255
MSTRG.12524.3	87.5214	25.8949	27.6494	46.4032	27.4256	33.713	40.2546	48.044	57.8174	45.5072
MSTRG.12525.1	49.4186	23.2828	17.8375	14.645	18.8093	17.4121	18.8428	18.3132	24.6502	22.6699
MSTRG.12525.2	32.7519	19.3157	21.1755	12.7349	15.3462	16.7142	11.7448	16.0779	17.5695	21.306
MSTRG.12525.3	24.9326	15.5552	9.9038	8.00523	6.52799	8.50068	14.3516	11.775	23.9274	15.7023
MSTRG.12531.1	0	2.51232	0	0	1.8494	0.339554	0.7565	0.354894	0	0.770934
MSTRG.12538.2	0	0	0	0.386792	0.204963	0.424339	2.52546	0.959353	1.51039	0.66713
MSTRG.12542.1	0	0	0	2.49488	0	0	0	1.22902	0	1.36508
MSTRG.12543.1	0	0	0	0	0	0	0	1.87594	0	0
MSTRG.12548.1	1.1804	0	1.11491	0	1.02046	1.2474	2.26322	1.60827	0.976051	2.18691
MSTRG.1255.1	0.522927	2.53777	0.376795	0.854057	2.11502	1.23921	0.903999	1.5051	1.5779	1.09197
MSTRG.1255.2	0	5.3514e-62	2.10987e-19	4.11411	2.36885	3.52065	1.30959	2.12447	2.93514	1.36567
MSTRG.12550.1	0	0	1.57058	1.45021	0	0.910299	0	0	0	0
MSTRG.12551.1	0.149121	0.445481	1.66914	1.95987	1.54623	0.976111	1.69366	1.34638	2.66839	1.76391
MSTRG.12552.1	0.843544	0.458284	3.30686	2.39634	1.8777	1.00642	1.30368	0.791979	2.85284	1.58131
MSTRG.12555.2	0	0.128204	0.158956	0.34685	0.488431	0.54899	1.08718	1.49399	0.402318	0.287331
MSTRG.12557.1	0.936599	1.04284	1.79019	0.848385	1.30637	0	0.91846	1.27228	0	0.872552
MSTRG.12558.1	0	0.375578	0.116288	0.341166	1.36592	1.18184	1.86181	0.89439	1.32395	0.846007
MSTRG.12561.1	0.165832	0.534139	0.823019	1.12458	2.66071	1.75211	2.62883	1.10547	0.37732	1.37552
MSTRG.12568.1	0	0	0	0	0.378439	0	0.859575	0.391055	3.13524	1.37023
MSTRG.12578.1	0	0	0	0.203685	0.539472	0.328028	0.888371	0.701974	2.22985	1.05827
MSTRG.1258.1	1.11202	0.718243	1.10067	0.214367	0.292874	0.115221	0.467426	0.211344	0.337592	0.140535
MSTRG.12581.1	0	0	0	0	0	2.31941	0	0	0	0.912352
MSTRG.12583.1	0	0	0	0	0	0	0	1.07439	0	0
MSTRG.12584.1	3.07309	2.7393	3.14773	5.29302	5.03724	2.9882	4.82036	4.78918	5.36034	4.32294
MSTRG.1259.1	1.86448	1.36337	0.60314	0	0	0	0.628016	0.285051	0.225853	0.213633
MSTRG.1260.1	0.193497	0.416034	0.575397	1.12194	0.254927	0.287285	0.203926	0.368447	0.0738237	0.520992
MSTRG.12602.1	0	0	0	1.02577	0.498652	0	1.10823	0	0	1.11838
MSTRG.12613.2	0.000149272	1.47456	0.000154031	0.889267	0.396168	0.394363	0.959397	1.09851	0.339361	1.24225
MSTRG.12615.9	0.202824	0.162952	1.25166	2.85611e-06	0.706066	8.67133e-16	5.1138e-06	0.0767367	0.451663	0.358231
MSTRG.1262.1	0	0.704268	1.24385	0.595898	1.15497	2.6339	2.58785	1.76223	4.74431	1.48174
MSTRG.12627.1	1.63377	1.04078	1.60148	0.710642	1.07175	0.949154	0.786893	1.35505	1.3919	1.42978
MSTRG.1263.1	0	0	0	0	0	0	0.826456	0.765594	0.93559	1.97111
MSTRG.12630.1	2.22792	1.46825	1.17108	0.511446	0.643319	1.09799	1.28832	0.830231	1.11079	1.28357
MSTRG.12634.1	0	0	0	1.13229	0.555349	0	0	1.18726	0	0
MSTRG.12635.1	0	0	0	0	0.192078	1.02691	0.394574	0.180281	0.288	0.112692
MSTRG.12636.1	0.0903302	0.192887	1.48839	2.21181	4.33365	3.15248	5.26663	3.78908	7.23725	5.80563
MSTRG.12638.1	0	3.70762	0	7.05625	0	1.63391	2.50294	0	0	0
MSTRG.12656.1	0	0.293661	0.80616	0.522329	0.496474	1.1566	1.99212	1.41775	2.46353	1.1299
MSTRG.12661.1	3.2383	2.02035	2.77607	2.58213	3.57197	3.52521	3.06241	2.39381	3.50407	4.21423
MSTRG.12665.1	2.17753	2.33811	3.15872	1.46024	2.18401	2.14603	2.47788	2.07593	0.817769	1.97027
MSTRG.12681.1	0.847116	1.77377	2.05528	4.537	1.85358	1.86175	1.46217	2.0712	3.94689	1.9544
MSTRG.12696.1	3.97003	4.43224	0	3.57923	1.76556	1.04482	2.90461	2.22524	0.758048	4.19684
MSTRG.12698.1	0	6.43828	0	0	5.96495	6.86638	0	4.30793	8.18412	4.10518
MSTRG.12703.1	1.341e-05	5.51589e-07	5.41593e-06	3.46413e-05	2.99451e-06	1.61979	1.68835e-05	4.74069e-06	1.79596e-05	2.76175e-05
MSTRG.12703.2	1.98495	7.85789	6.18956e-06	1.36838	2.05981	1.7501	0.46793	1.06165	1.27852	1.22758
MSTRG.12703.3	1.06138	1.35734e-33	0.723335	1.99269e-22	0.788108	0.160101	0.943051	0.495618	1.70778	0.855902
MSTRG.12704.1	3.01758	0.00415119	5.23564	2.24542	4.77388	9.274	14.5749	8.17365	1.87712	7.21526
MSTRG.12704.2	0	3.7032	1.09634e-62	0	3.81134	3.95746	0	1.33914	2.95861	2.72259e-18
MSTRG.1271.1	4.55187	3.52072	2.17193	2.96058e-05	0.946582	2.20474	0.834906	1.55104	0.303489	0.836484
MSTRG.12710.1	4.94414e-09	1.13705	1.01601	4.88968	3.28378	3.80636	4.27211	3.98732	3.7106	4.03522
MSTRG.12712.1	7.78092	17.4314	20.3183	14.5486	20.4314	16.9865	30.7295	32.094	23.206	23.8499
MSTRG.12713.1	76.3894	109.438	92.2944	170.808	185.636	81.7259	98.7604	436.653	123.134	308.429
MSTRG.12715.1	0.934844	0.401875	1.29772	1.0954	0.456191	0.339609	0.797424	1.68892	0.921711	0.660447
MSTRG.1272.9	0.579507	0.932381	0.28791	1.06398	0.254693	0.149873	0.153433	0.207959	0.0550642	0.239511
MSTRG.12729.1	0.149884	0	1.04225	0.581654	0.417511	0.444818	0.317311	0.856985	1.01979	0.873557
MSTRG.12735.1	0	0	0	0	0.604736	1.15821	0	1.06074	0.733914	1.73373
MSTRG.12739.1	0	0	1.64293	0	0	0	0	0	0.689059	0
MSTRG.12749.1	0	0	0	0.549196	0	0	0	1.89485	0	1.12702
MSTRG.12752.1	0	0	0	0	0	0	0	1.4052	1.11975	0
MSTRG.12754.1	3.82979	4.14699	1.71231	0.995519	1.97006	2.20337	1.08398	1.6391	1.83778	1.77617
MSTRG.12757.1	2.80978	2.69516	1.85452	0.839403	1.36974	1.36073	1.27337	1.32476	1.69016	1.61436
MSTRG.1276.1	0.976332	1.76012	0	0.310812	0	0.14607	0	0.307253	0	0.231904
MSTRG.12764.1	7.19998	6.76161	9.0407	4.63739	2.02405	3.78115	1.76573	3.17613	1.16471	4.60381
MSTRG.12767.4	3.83156	2.20318	1.26207	0.49096	0.914502	1.1209	0.535086	1.57386	0.381573	0.991407
MSTRG.12768.1	0.281045	2.2855e-117	1.95235	0.572846	0.44593	1.07706	3.62423	0.846931	3.23743	1.38242
MSTRG.12768.2	0.420141	1.08989	3.58238e-07	1.44956	0.269664	0.732711	0.631306	0.493385	0.819233	1.48791
MSTRG.12769.1	0	0	0	0	0.382012	0.195411	1.60109	0	0.0806798	0.255899
MSTRG.12771.1	2.25321	1.6754	0.687903	0.838997	0.583939	0.257267	0.183035	0.991249	1.37298	0.68817
MSTRG.12772.1	2.7032	1.80196	1.69133	3.65247	0.772235	2.59305	1.81787	2.76568	0.888697	1.38506
MSTRG.12784.1	10.1989	11.4759	10.3454	11.9323	11.1366	10.083	9.79516	10.0261	8.63469	10.8329
MSTRG.12787.1	0	0.611129	0.543989	1.04571	1.5965	0.751419	1.13624	1.2937	2.26922	2.08918
MSTRG.12789.1	1.26007	3.8109	0.000127661	1.87039	2.31985	0.00010826	1.42823	0.000152178	1.20646	0.00117749
MSTRG.12794.1	1.98322	2.57197	2.8202	2.7128	2.93547	2.46403	3.10371	2.101	3.95163	3.1836
MSTRG.12795.1	0.476194	1.52203	2.56378	3.58855	6.59768	4.1175	3.93842	3.00854	6.61875	3.00412
MSTRG.12804.1	0	0.369142	2.68444	0.650477	0.919362	0.813356	2.47915	1.28668	2.94231	1.20423
MSTRG.12806.1	0.688417	1.19638	1.20785	1.2677	1.60306	0.953252	1.39285	0.831174	2.04348	1.36538
MSTRG.12816.1	0	0	0	0	0.685171	0.709462	2.94691	0	9.73839	2.01819
MSTRG.12842.1	0.813201	0.962904	0.926497	1.17555	1.22519	1.18322	2.17129	0.992648	1.72303	1.03251
MSTRG.12842.2	1.53514e-18	1.57933e-22	6.42024e-06	5.53286e-13	0.737142	1.53899	2.52292e-07	3.23449e-09	0.00118417	0.112473
MSTRG.12844.1	0.930779	2.01217	0.305754	0.296711	1.13039	0.718096	0.323199	1.1727	0.353448	0.379338
MSTRG.12857.1	0	2.33164	0.840637	1.21801	1.3139	1.08532	1.32517	0	1.31539	0.27785
MSTRG.12858.1	17.3589	12.8916	13.1943	14.6598	12.7047	19.2923	21.0464	20.7519	14.9808	17.2118
MSTRG.12858.2	189.716	120.043	218.978	234.464	263.543	238.568	307.245	270.77	162.223	205.402
MSTRG.12858.3	8.43883	9.4976	10.0103	10.1886	13.6941	8.8138	10.7777	13.4244	7.69608	9.50706
MSTRG.12863.1	0	6.97192	5.02603	4.49085	4.8079	5.29877	0	4.91541	2.7028	2.75732
MSTRG.12868.1	50.9014	221.43	610.849	766.496	1339.6	1078.66	1342.33	792.83	2580.73	1278.61
MSTRG.12868.2	2.86619	24.9077	83.5627	107.492	164.005	145.631	199.051	110.648	379.773	182.336
MSTRG.12878.1	0.543829	0.387904	1.3546	2.03338	2.10141	1.85525	2.79903	1.82271	2.15294	1.05781
MSTRG.1288.1	1.99764	0.854885	2.21924	1.40609	3.4187	2.26475	2.49255	2.45038	4.62154	3.56666
MSTRG.12880.2	0	0	0	0	0	0	0	0.343808	1.15317	1.51308
MSTRG.12897.1	8.40149e-06	0.0811948	1.00654e-05	0.148337	0.314367	0.713403	1.58789	0.764172	8.92878	5.84632
MSTRG.12905.1	0	0	1.67592	0	0.7827	0.979248	0	1.66366	1.25429	0
MSTRG.12907.1	0	0.412002	0.379949	0.37045	1.26243	0.383737	0.202005	0.182344	1.71728	0.112626
MSTRG.12915.1	1.41473	2.58484e-136	1.71468	1.55662e-158	1.44768	2.29135	2.65526	0.606809	0.625073	0.783087
MSTRG.12915.2	0	0	0	0	0	0	1.63009	0	0	0.55276
MSTRG.12927.1	2.13856	0.990457	1.80685	2.33832	1.59877	1.22555	1.592	1.00977	1.03504	0.914851
MSTRG.12928.1	1.49781e-05	0.933605	62.4777	62.3654	1.98702e-17	29.7233	36.8439	3.17926	5.90825	22.8554
MSTRG.12928.2	2.93416	0.339863	8.12832e-99	4.55914e-32	1.40802	6.30518	5.07023e-140	20.6549	9.86197e-32	0.020863
MSTRG.12928.3	7.32677	10.9415	16.0471	39.5425	14.737	21.8504	16.6453	24.0163	3.22518	13.3784
MSTRG.12928.5	0.331819	0.140798	0.609186	2.07575	1.56125	2.65477	1.16968	1.06648	0.176419	1.0886
MSTRG.12929.1	0	0.708966	0	2.6209	2.71205	2.42363	1.41228	2.84587	0.261929	1.31095
MSTRG.12929.2	0	0	10.9734	0	0	31.4642	0	14.1886	0	10.4627
MSTRG.12929.3	0	0	1.6327	4.51797	0	0	0	2.25118	0	0.553577
MSTRG.12929.4	0	0	0	0	0	4.12122	0	3.73817	0	0
MSTRG.12929.5	0	0	0	0	0	2.65793	0	3.51739	0	0
MSTRG.12930.1	4.15412	6.01725	21.0899	16.0917	15.6133	19.6207	16.458	15.3881	8.65054	18.6765
MSTRG.12930.2	2.10553	7.54172	31.9477	26.2287	15.6228	18.5188	54.3491	18.8465	14.277	19.3309
MSTRG.12935.1	7.59465	2.22622	9.44144	15.5853	3.63792	5.398	2.37109	5.40325	3.37039	10.1481
MSTRG.1294.1	0.347769	0.943928	2.92969	2.04187	2.73589	2.31194	2.39514	3.23504	5.77663	3.07177
MSTRG.12941.1	0.580777	0.940773	1.43227	0.556398	1.3134	0.672102	1.21238	1.51116	0.665478	1.21671
MSTRG.12942.1	0	0	0	0	0	2.56198	3.67219	2.0766	0	2.33813
MSTRG.12952.1	9.95139	8.19253	8.17514	8.92908	5.95283	6.88879	6.8709	10.3988	2.16386	7.48928
MSTRG.12959.1	8.56875	8.14623	6.3634	7.98297	3.60884	4.96248	4.99693	2.70921	1.99698	2.59162
MSTRG.12960.1	3.30526	7.12067	9.10733	9.54577	8.59914	9.11828	9.91027	4.92931	7.8807	10.0279
MSTRG.1298.1	0.659479	0.796101	0.377533	0.837751	1.12656	0.868515	0.55951	0.610379	1.18604	0.857408
MSTRG.12980.1	4.09983	7.92135	5.37758	2.04653	1.49442	2.42886	0.180697	0.909412	0.723493	2.13585
MSTRG.12982.1	0	0	0	0	0	0	0	0	1.09697	2.9222
MSTRG.12988.1	1.62964	2.18405	8.37004	6.59604	10.3115	6.88946	11.5164	8.7523	22.4729	8.7959
MSTRG.1299.1	0	0	0	0	2.35234	2.43661	8.72889	0	1.76647	5.72392
MSTRG.12990.1	0	0	0	0	0	1.25103	2.39206	5.08197	0	0
MSTRG.12998.25	0	0	0	1.20097	1.69939	9.7318e-15	0.954869	1.21061	0.657356	0.792389
MSTRG.12998.26	0	0	0	0	0	7.67719	0	0	0	0
MSTRG.13007.1	0	0	0.692045	0	0.308248	0.182769	0.730034	0.331673	1.71491	0.368936
MSTRG.1301.1	0	0	1.39517	2.59379	0	0	0	0	0	1.88621
MSTRG.13011.2	0.782418	5.53682e-06	7.8213e-06	0.861537	1.90334	8.23391e-06	7.98008e-06	0.411893	1.03205e-05	0.310415
MSTRG.13018.1	0	0	0	4.93382	0.842562	0	0	0	0.873862	0.678889
MSTRG.13021.1	0.497286	3.72307	9.74799	13.5909	24.343	21.8306	25.7916	25.2396	23.3187	24.5669
MSTRG.13026.1	0	0.299453	0.547761	0	0.60843	0.431728	1.73987	0.920201	0.516904	0.198891
MSTRG.13029.7	2.37202	2.26045	2.25406	1.77145	2.54873	2.30767	2.61601	3.00896	4.18705	1.51165
MSTRG.13037.1	0.234838	0.25157	0.700995	0.457008	0.680051	0.984285	1.24698	0.896844	2.0415	0.884411
MSTRG.13038.1	1.78256	0.212594	0.767378	1.42652	0.809358	0.729351	1.70862	1.75552	1.20338	1.97071
MSTRG.13038.2	0.501476	3.45451e-10	1.38748	1.04401	1.10669	0.868787	0.373509	1.16041	1.70565	1.52423
MSTRG.1304.1	0	0	0	0	0	0	0	0	2.67313	3.35203
MSTRG.13040.3	0.526383	0	2.05292	2.46949	2.68847	2.31603	2.68415	3.93442	8.44242	4.39484
MSTRG.13044.1	7.51384	10.8426	13.0427	16.0021	21.9187	18.5048	19.2188	18.4893	19.5252	16.9787
MSTRG.13064.1	0.270687	0	0	0.519563	0.906679	0.402281	1.13234	0.89717	0.608263	2.04879
MSTRG.13064.2	1.17122	0	0	0.741428	0	0.203277	2.82811e-28	0.182733	0.287049	0.334505
MSTRG.13065.1	0	0.765104	0	1.28549	1.21128	1.0386	0.697458	0.642561	0.803767	0.472955
MSTRG.13066.1	0	0.248366	1.14092	3.10987	2.03837	0.956028	2.4216	1.75156	2.42398	1.62323
MSTRG.13070.1	0.350503	0.436861	1.22425	1.48581	1.38405	0.888197	1.43544	1.28852	2.16334	2.23855
MSTRG.13081.1	0.901462	2.1615	1.68646	3.97062	5.28503	4.28989	4.21306	3.13992	4.99081	3.55952
MSTRG.13086.4	2.29268	6.01632	1.11887	0	1.14172	2.08038	1.28172	1.08908	3.5151	0.0725229
MSTRG.1309.1	0	0	0.572907	0	0.891295	0.130362	0	0.274715	5.59748	1.72015
MSTRG.13095.1	0	0	2.50562	0.793497	0.378439	1.3722	2.57872	1.57951	1.56348	0.290817
MSTRG.13101.1	0	0	0	0	2.90931	1.56616	0	9.90026	2.93989	5.51052
MSTRG.13107.3	0.270593	0.1446	1.05814	0.991819	1.75122	0.966583	1.6104	1.33865	2.04729	1.65493
MSTRG.13144.1	6.93546	9.0469	10.1677	7.68928	7.72907	7.24987	9.25351	9.15682	8.96755	7.75626
MSTRG.1315.1	0	0	0	0	0	0	0	0	0	4.61067
MSTRG.13158.1	3.31395	0.728401	0	0	0	0	0	0	0	0
MSTRG.1316.1	0	1.90024	0	0	0.707209	0	0	0	0.709589	0
MSTRG.13164.1	17.315	12.4634	8.71102	11.7752	7.6045	9.34197	12.0192	4.86645	8.75087	11.8931
MSTRG.13166.1	0	0	0	0	0	0	0	0	0	2.2115
MSTRG.13167.1	0	0	0	0	0.79264	0.839676	1.70548	0.790831	0	2.51793
MSTRG.1317.1	0	0	0	0	0	0	0	0	1.01202	0
MSTRG.13170.1	0.595522	0	0	0	0.55426	0.266861	1.20656	1.11329	1.10137	0.910076
MSTRG.13175.1	0.405889	0.867617	0.809744	0.925701	1.05935	1.04548	1.80513	1.75103	1.90893	1.97712
MSTRG.13181.2	0.40631	0.441163	0.797015	0	0.763966	1.60333	0.419264	0.763623	1.67054	1.54594
MSTRG.13195.1	0.981765	2.44982	1.07076	0.611902	0.204811	0.512374	0.0653396	0.230338	0.426768	0.153902
MSTRG.1320.1	0	0	2.39514	0	1.14136	0	0	0	0	2.54607
MSTRG.13205.1	0.411815	1.28588	2.22161	0.592595	0.624715	0.332832	0.214133	0.57566	1.79812	0.737184
MSTRG.13209.1	27.2518	21.9438	9.62194	8.99008	12.1904	11.0482	5.07567	11.6976	7.98703	10.5464
MSTRG.13214.1	0	0	1.55348	2.21898	0	0	0	0.364535	0.614526	0.516188
MSTRG.13215.1	0	0	0	2.14775	2.28964	1.46507	2.2904	5.88827	0	0
MSTRG.13223.1	1.65556	0.380055	0.235317	0.230112	0	0.167412	0	0	0	0.0346773
MSTRG.1323.2	0	0	0	0	0.527653	0	1.07492	0	0.395292	2.18953
MSTRG.13237.1	6.30321e-27	0.691938	0.228777	7.69288e-07	0.747161	0.596859	0.273453	0.269887	1.16134	0.574103
MSTRG.13238.1	8.86796	4.04648	14.5796	66.4264	42.3248	38.5583	10.1024	24.6283	36.5774	36.517
MSTRG.13238.3	3.56238	4.24793	3.04256	1.04239	2.15828	2.43434	2.52866	1.09779	4.14791	2.12635
MSTRG.13249.1	7.37688	3.21751	5.01335	6.89625	4.16167	4.88616	6.47403	4.82903	9.04501	6.17739
MSTRG.13251.1	23.7242	25.8236	18.7359	36.1134	21.4801	39.3592	17.598	39.4719	11.2996	32.8646
MSTRG.13251.2	2.16554	2.35309	8.60756	5.74726	2.31202	4.18782	2.97085	2.0977e-22	0.664726	3.09016
MSTRG.13251.3	7.57152e-07	3.83707	3.75674	1.19842e-05	5.00164	7.85572	2.85882	2.00442	1.86571	4.12132
MSTRG.13251.5	1.26166	12.6819	5.36411	3.7097e-41	3.60159	5.67644	2.86261	9.1564	2.11902	3.50014
MSTRG.13251.6	4.77934e-25	1.01074e-18	8.39595e-20	2.06053e-19	6.85764	2.47699e-15	1.15006e-08	6.00666	2.77079	6.72295
MSTRG.13251.7	1.30202e-41	5.1075	5.63095e-35	2.42504e-49	3.69346	0.959031	5.50721e-34	0.967242	0.961715	3.43
MSTRG.13251.9	3.3112	7.34976e-20	8.35209e-20	1.34277e-25	3.38499e-15	5.13318e-16	6.07794e-21	1.00592	1.25381e-09	1.31002e-15
MSTRG.1326.8	1.04427	7.65693e-10	1.29989e-30	1.16987e-10	0.248884	2.21271	1.98255	3.23405	1.28843	2.39485
MSTRG.13264.1	1.39203	1.59665	2.87078	2.74391	4.13582	3.49554	4.73417	4.36343	5.61267	3.99108
MSTRG.13268.1	1.38272	1.03306	1.15097	1.38244	0.915672	1.47831	1.11927	1.3763	1.03588	1.67224
MSTRG.13285.1	0	0	2.23664	2.01588	3.20671	0	0	1.12434	5.99099	2.35993
MSTRG.13290.1	3.11571	3.75491	2.5375	1.63804	2.76514	3.16407	3.49115	2.41987	2.93223	2.72446
MSTRG.13290.2	7.56637	5.81665	6.0516	4.16411	6.28732	5.16017	5.20408	4.88514	2.71507	4.32304
MSTRG.13292.1	0	0	3.02282	2.66633	0	0	2.82906	0	8.82113	0
MSTRG.13297.3	0.953066	1.61064	0.975182	1.59958	2.35693	1.75341	2.26658	0.940579	0.288417	0.847968
MSTRG.133.1	0	0.292047	0.534562	0.519563	0.868884	0.944937	2.54778	1.6668	2.03455	1.06761
MSTRG.13302.1	0.835255	2.02164	4.68717	4.32649	3.42569	3.17015	4.56751	3.88843	3.58884	4.02281
MSTRG.13313.1	1.25078	0	0	0	0.308397	0	0.631716	0.28674	0.246948	0.799207
MSTRG.13317.1	0.128293	0.412508	0.637911	0.249419	0.546197	0.429596	1.36097	0.368006	1.01624	1.27215
MSTRG.13318.1	0	0	0	0	1.09364	0	0	7.0866	0	0
MSTRG.13323.1	0	0	0	0	1.02896	3.16542	0	0.952865	0	0
MSTRG.13325.1	0.950126	0.7166	0.326929	0.637962	1.18418	0.468495	1.61809	0.775173	1.36982	1.69038
MSTRG.13338.1	0	8.5784	0	0	2.39458	2.70157	0	0	0.000962292	0
MSTRG.1334.1	0	0	0	0	0	0	0	1.32604	0	0.328269
MSTRG.13349.1	0	0.458284	2.06679	0.39939	0.553642	0.21941	0.43456	0.592856	0.154811	0.641795
MSTRG.13350.1	0	2.72134	0	3.72611	8.76544	5.49262	3.98642	6.75305	7.36886	4.39257
MSTRG.13352.1	1.77527	1.19438	1.7572	1.7112	1.02178	1.38739	2.79846	1.68629	1.83642	1.33154
MSTRG.13355.1	0	0.96695	0	0	0.799252	0	0.859575	0.812696	2.30372	1.13344
MSTRG.13356.1	0.345749	1.12303	2.04077	2.30727	2.38789	1.67373	2.51235	1.95842	1.17098	2.79849
MSTRG.13359.1	8.71898	14.8476	7.75564	7.03931	20.0819	10.0615	23.0851	13.5866	10.4596	10.1995
MSTRG.13359.2	0	0	0	1.68255	1.60243	1.76732	1.78151	0	3.11884	0.563918
MSTRG.13360.1	0.256093	1.65668	2.27749	0.984383	2.83636	2.07925	2.1457	1.33495	2.41286	1.79419
MSTRG.13361.1	0	14.0078	0	0	28.7137	26.3128	40.2761	55.379	9.87838	29.1801
MSTRG.13362.1	0.357125	1.20104	0.361825	0	1.34309	0.198342	1.15624	1.20958	0.585072	0.876808
MSTRG.13362.2	11.542	39.0899	53.4944	55.7835	66.7191	52.8283	34.3314	40.0409	41.7058	41.5952
MSTRG.13362.3	36.3574	203.81	192.007	105.996	382.126	279.818	135.323	205.304	331.875	280.853
MSTRG.13363.1	1.4949	0	0	0	0.643049	0	0	0.650423	0	0
MSTRG.13367.1	1.55955	3.16872	2.60956	2.44555	1.18759	2.28968	0.5006	0.663996	0.510276	0.528426
MSTRG.1337.1	1.65216	1.79445	0	1.17427	0.776339	1.20036	1.70371	1.359	1.39105	0.413312
MSTRG.13372.1	0	0.0582685	5.71274e-141	0.160151	0.684847	0.16135	0.585548	0.304204	1.55165	0.796227
MSTRG.13373.1	0.354659	0.380986	0.879576	1.71616	1.52662	0.74277	0.273946	1.94216	4.27679	2.2909
MSTRG.13378.1	2.34485	0	0	7.59626	0	0	0	0	0	1.33827
MSTRG.13393.1	0	1.63848	0.94448	0.920908	1.78465	1.36217	1.80782	2.08603	1.07098	2.33303
MSTRG.134.2	12.558	9.41295	12.906	8.55723	4.06433	8.84895	4.18448	8.86131	5.78377	8.32326
MSTRG.134.3	8.11316	2.78095	0.874509	1.0521	2.21928	1.95397	0.975072	0.318877	1.47255	0.645157
MSTRG.134.4	4.04204	3.8316	0.000245199	0.000688045	3.41589e-05	0.333837	0.00198984	5.59894e-05	0.00664797	9.0315e-05
MSTRG.1340.1	0	0	0	2.13837	1.3509	0	1.54571	1.08902	0.590249	1.80959
MSTRG.13414.1	0	17.7638	0	0	1.89395	3.92513	0	0	0	1.57724
MSTRG.1342.1	0.454617	1.93062	2.45097	1.71364	2.18277	2.4428	3.05783	1.91939	3.76333	2.79606
MSTRG.13421.1	2.98886	2.73495	0.784326	2.34698	2.73037	2.48037	2.3187	2.07963	2.24189	2.95342
MSTRG.13426.1	0.342971	1.46942	0.796392	0.890171	1.51149	0.883764	1.82174	0.764065	1.16405	0.946258
MSTRG.13428.1	1.02149	2.14135	7.38378	8.90463	4.51354	4.59688	7.87988	6.04352	4.78358	8.07175
MSTRG.13428.2	1.52811e-101	5.05856	8.7617e-170	1.98931e-221	1.8716e-72	1.53807e-71	0	1.26157e-85	1.31476e-95	6.21111
MSTRG.13429.1	0	0	0.770743	0.734125	1.47543	0.840121	2.38738	1.09803	0.288575	1.83288
MSTRG.13430.1	1.36955	0	1.78658	2.15487	1.34161	1.83543	0.468762	0.855517	0.177834	1.76365
MSTRG.13432.1	0.419283	0.358767	0.919361	0.98212	0.806972	0.693809	1.52566	1.3705	0.418851	1.55546
MSTRG.13445.1	0	0	0	0.232671	0	0.125327	0	1.37651	0.0926078	0.698648
MSTRG.13446.1	0	0	0.431701	1.47163	0.957109	0.534669	1.37529	0.932166	0.899351	0.605623
MSTRG.13447.1	0.196539	0.629285	3.108	2.82018	3.32593	2.10917	6.25173	3.55071	5.68139	4.31136
MSTRG.13448.1	0.312438	1.82401e-07	4.19881	3.81929	3.79257	3.05327	5.92598	3.57091	7.43173	4.73572
MSTRG.1345.1	0.230099	0.743362	0.455327	0.443264	1.04273	0.667678	0.724843	0.983039	0.346638	0.888195
MSTRG.13453.1	1.74152	5.73155	3.12735	3.95014	3.03313	4.56774	1.87736	3.76991	6.32676	3.01067
MSTRG.13453.2	4.12187	2.70664	3.62575	4.03533	2.9753	2.91128	6.31158	3.9806	4.72261	4.34948
MSTRG.13455.1	3.61079	2.28816	2.2356	3.18438	1.58221	2.25315	1.10289	5.47271	0.337502	5.27859
MSTRG.13455.2	0.000925157	1.05582	0.011994	0.00120684	0.214672	2.51161	1.99491	3.05534	1.2569	1.199
MSTRG.13455.3	4.61363	4.51112	2.05524	5.57966	5.08121	4.82895	2.3463	5.75946	0.695711	8.58141
MSTRG.13458.1	11.7817	3.97346	0.921333	1.67224	0.427219	0.127936	0.421121	0.56943	0.148877	0.397642
MSTRG.13459.2	1.04311	3.22703	4.92005	6.39438	4.674	5.73417	6.44277	6.04363	4.23308	6.15311
MSTRG.13460.1	0	0.177156	0.491381	0.159869	0.519664	0.330284	1.2208	0.550562	3.49013	1.6357
MSTRG.13461.1	2.59674	1.52625	1.23053	1.71367	1.2419	1.08769	2.42587	1.67996	2.28237	1.46864
MSTRG.13468.1	3.23655	0	0	0	2.6549	2.7877	2.62427	1.21284	0	0
MSTRG.1347.2	0.325444	0	0.320476	0.621624	0.73515	0.168962	1.01552	1.0758	0.981979	1.35001
MSTRG.13471.1	0	0	3.74134	3.26325	3.45905	4.28227	0	0	0	0
MSTRG.13481.1	0	0	2.57605	0	0	1.58878	4.89255	0	1.9237	0
MSTRG.1349.1	0	0	0	0	0	0	0	0	2.16376	0
MSTRG.13496.3	0.949046	0.424513	0.262796	1.00716	0.865947	0.976922	1.87512	1.28548	0.849724	0.877892
MSTRG.13500.1	0	0	0	0	0	0	6.5907	0	0	0.721205
MSTRG.13509.1	4.0541	5.98584	4.86168	8.83449	8.2171	7.12762	6.24626	6.59758	5.9047	6.18932
MSTRG.13522.2	7.21608	7.49253	5.64675	4.71251	7.1987	7.48578	4.5158	5.60178	5.03572	6.80406
MSTRG.13528.1	0.0318528	0.271901	0.541114	0.468534	0.645828	0.486275	0.580081	0.474532	1.19398	0.794403
MSTRG.13529.1	0	0	0	0	1.80261	0.681499	2.44363	0	0.45268	1.23995
MSTRG.13550.1	0.893977	1.76404	3.42956	3.56206	3.46177	2.56425	4.2567	3.42794	3.4212	3.99034
MSTRG.13556.1	1.63189	0.443002	0	0	0.767022	0.183025	0	0.383337	0.14985	0.120619
MSTRG.13560.2	15.0323	36.6848	36.9925	53.9878	40.0003	33.2618	36.8017	33.4431	23.5214	28.7923
MSTRG.13563.1	12.9038	67.3282	43.7612	23.2421	14.1925	17.2057	1.05822	4.83081	6.60023	14.3192
MSTRG.13563.2	6.69136	37.7497	16.0297	6.91978	3.3916	11.1284	2.06872	2.08807	1.98197	7.02477
MSTRG.13567.1	0	0	0.409963	0	0.18301	0	0.86213	0.590221	1.57982	1.04897
MSTRG.13568.1	0	0	0	0	0	0	1.32763	0	1.09131	0
MSTRG.13569.1	0	0	0	0	0	0	2.75761	0	2.05991	0
MSTRG.13577.1	0.398199	0.432192	1.17213	1.13356	1.79484	0.564347	2.05612	2.93505	1.18679	1.5953
MSTRG.1358.1	0.782313	0	0	0	1.78243	0.410019	0.778465	0.731585	3.45655	1.46289
MSTRG.13581.1	2.80979	3.01065	1.33678	1.66346	1.66221	2.50631	1.68579	1.98288	0.32115	1.58149
MSTRG.13589.1	0.106171	0	0.5285	1.44777	0.653675	0.431819	0.338643	0.912074	0.83924	0.80775
MSTRG.13593.4	0.000764474	0.586018	0.482152	0.000602101	0.872483	1.46578	0.00233425	0.519321	0.0857764	0.342531
MSTRG.13593.5	1.3204	0.599149	0.00962486	0.271293	0.00394153	0.836302	2.91026e-05	0.109596	0.525419	0.793622
MSTRG.1360.1	0.0817936	0.437385	1.38602	0.958139	1.07506	0.363803	1.13332	1.01598	1.35338	1.38988
MSTRG.13600.1	1.29403	1.85675	1.70834	0.624011	1.6389	1.23662	0.680374	0.614618	0.972875	1.08965
MSTRG.13607.1	21.2681	33.3015	33.9586	37.7187	28.1533	32.6192	31.8441	34.5049	31.7806	37.1213
MSTRG.1362.1	0.0912652	0.0447148	0.395418	0.596774	0.353351	0.546052	0.616077	0.529742	1.06981	0.578961
MSTRG.13620.2	0.49259	1.07404	0	1.39067	1.13722	0.220876	0	1.15333	0.540493	1.96544
MSTRG.13623.1	0	0	0	0	0.842562	1.05908	0	0	0.873862	0
MSTRG.13624.1	0.077958	0.500161	0.466334	0.685145	0.756383	0.667313	1.16371	0.52235	0.764417	1.1724
MSTRG.13626.1	0	0.841457	0.256962	0	0.625297	0.521349	1.3615	1.10881	0.680761	1.2558
MSTRG.1363.1	0	0	0	0	0	0	0	0	0	2.74137
MSTRG.13630.1	0.687517	1.37165	3.04352	4.75073	4.37271	2.93203	3.22608	3.86028	1.33465	3.34899
MSTRG.13630.3	1.81774e-06	1.30663	0.322855	7.38805e-06	0.67632	0.984362	6.65535e-06	1.56937	1.3472	0.728307
MSTRG.13631.1	1.52481	2.73978	8.39318	10.5031	10.0309	6.65964	8.78508	7.29729	5.3993	6.55848
MSTRG.13631.2	0	0	1.58496	2.73059e-14	2.95782	1.97706	3.85208e-09	1.64426	0.956089	1.03883e-05
MSTRG.13636.1	0	0	0	0	0	0	0	0	1.05294	0
MSTRG.1364.1	0	0	1.29214	1.85531	0.618658	0.597709	3.35631	0.914432	1.96976	2.15574
MSTRG.13645.1	0	6.20923	0	0	0	1.13186	0	0	0	0.88942
MSTRG.13646.1	0.699998	0	0	1.94095	0.609841	2.56051	1.40405	1.93154	1.64383	2.20568
MSTRG.13648.1	7.95949	0	2.34001	0	2.23401	0	0	1.17886	0	0
MSTRG.13649.1	1.04887	0.225687	0.207765	0.202424	1.24134	1.1306	0	1.29575	0.233478	0.885106
MSTRG.13650.1	2.49648	1.19638e-05	6.96192e-06	3.78731e-06	0.684461	8.10166e-06	1.15398e-05	1.56638e-05	1.22468e-05	0.848038
MSTRG.13652.1	5.12914	4.9512	3.99851	4.40462	3.8403	5.06514	4.51745	5.49566	4.17306	3.9444
MSTRG.13655.1	0	0	0	0	0	0	0.37263	1.01992	0.549189	0.227744
MSTRG.13667.1	4.47267	5.76402	2.09971	1.28602	0.679337	1.16434	0.912842	0.567113	0.24714	0.675457
MSTRG.13679.1	0	0	0	0.965225	0.466875	0	1.04355	0.475625	1.53259	0
MSTRG.13685.2	24.1314	20.7375	23.4409	19.8874	13.1568	15.4169	12.763	12.1446	6.37527	10.2275
MSTRG.13686.1	0.758551	0.837442	0	0	1.03011	0.397353	1.513	1.04251	1.12417	1.25526
MSTRG.13691.1	0	0	0	1.2635	4.43017	1.29636	2.72263	3.96521	1.23273	3.26967
MSTRG.13692.1	0	0	0	0	0	0	0	0	1.52497	0
MSTRG.13696.1	0.970797	0.529	0.948448	1.37123	0.424342	0.252841	1.98805	0.225297	1.08944	1.53109
MSTRG.13698.1	0	0	0	1.27998	0.635644	1.3153	0	1.35614	7.23355	1.01175
MSTRG.13703.1	0	0	1.70449	0	0	0	0	0	14.0659	0.558224
MSTRG.1371.1	0	0	1.03411	0	0.943773	0.574931	1.0538	0	1.2215	1.01222
MSTRG.13718.1	0	0	0	0	0.627249	0.322477	0	0.67461	0.260448	1.62325
MSTRG.1372.1	2.61639	1.4371	2.53507	3.03479	1.57221	2.19771	3.29444	3.63624	2.6657	2.56309
MSTRG.13721.1	0.630669	1.11826	0.636996	1.22855	0.696144	0.577137	1.78991	0.77547	1.65836	0.940372
MSTRG.13727.1	0.106397	0.11392	0.105924	0.310893	0.101674	0.102804	1.24431	0.406132	0.160635	0.464754
MSTRG.13728.1	0	0	0	0	0	0	0.852741	0.790831	1.35328	0.776022
MSTRG.13740.1	1.21274	0.652133	3.00395	3.70832	3.51889	2.31768	2.34116	2.97946	3.89292	3.01681
MSTRG.13744.1	0	0	0.109048	0.213347	1.18117	0.366799	2.56161	2.56644	0.907473	1.15767
MSTRG.13748.1	0.920238	1.75616	3.80323	5.59054	7.45251	6.39244	7.71899	5.91944	12.9097	8.57915
MSTRG.13749.1	0	0	0	0	1.14055	0	0	0	0	0
MSTRG.13750.1	6.87392	0	0	0	2.93376	0	1.99321	0	0.768292	2.08119
MSTRG.13757.1	0	0	1.96643	0	1.83618	0.544518	0	0	0	0.338697
MSTRG.13759.1	0	0	0.505434	0	1.35828	0.810298	0	2.65477	0.392135	1.5149
MSTRG.1376.1	0	0	3.29995	0	1.53714	0	0	0	1.22759	0
MSTRG.13764.1	3.59381	4.17303	0	0	0	0	0	0	0	0
MSTRG.13765.1	0.0810726	0.0864332	0.717873	0.913883	0.98251	0.395539	1.36705	0.866823	1.60631	1.10915
MSTRG.13765.2	1.54511e-05	1.62101e-05	0.538657	0.549805	0.243148	0.127609	1.11333	0.391123	0.282338	0.688061
MSTRG.13767.1	0.766025	1.40667	0.881183	0.969116	0.848728	0.543826	0.823643	0.627549	0.840382	0.939302
MSTRG.13767.2	3.4509	3.60333	2.02811	5.47067e-05	0.00010743	1.98238e-05	2.10821	1.50966	1.47855	0.191647
MSTRG.1377.1	0	0	0.776739	1.47932	2.54054	0.361426	0.801743	1.10645	1.22905	3.05185
MSTRG.13774.2	1.03678	1.18001e-24	2.99016e-05	2.0862	0.727744	0.253438	5.24459e-05	0.441384	0.596896	1.15347
MSTRG.13774.4	2.78982e-05	0.0188376	1.6127	3.67908e-19	1.81025	1.68473	2.40893	0.000245919	2.83039	0.345125
MSTRG.13775.1	0	4.87289	0	0	0	2.08331	0	1.41942	3.68276	1.33087
MSTRG.13778.1	1.40244	0	0	0	0.50763	0.314686	0.363778	0.164687	0.393737	0.361754
MSTRG.1378.1	0.12879	0.276077	0.512293	0.500748	0.283088	1.20421	0	0.122569	0.486046	0.33986
MSTRG.13788.1	0.834719	0	0	0	1.5345	1.49381	0	0	0.300152	0.283932
MSTRG.13789.1	1.2706	2.87549	0	2.23875	1.14242	0	3.62418	0.586329	0.529362	0.385056
MSTRG.13790.1	0	0.743691	0.654541	0.626332	0.294697	0.353653	1.35955	0.942899	0.758324	0.662069
MSTRG.13793.2	2.45918	2.34467	3.20457	3.87235	2.99415	3.29499	5.18157	3.936	4.36464	4.32348
MSTRG.13794.1	30.9863	6.43828	0	3.59815	5.96495	4.76216	11.3836	15.6343	4.30357	6.13204
MSTRG.13795.1	0	0	0	0	0	0	0	0	4.20727	0
MSTRG.13797.1	0	0	0	2.29102	0.562454	1.38128	0	1.20223	0.916447	1.23663
MSTRG.13798.1	0	0	0	0	0	0.667401	1.39675	0.687852	1.79678	1.4003
MSTRG.1380.1	3.5836	0	0	0	0	0.532962	0	0	0	0
MSTRG.13812.1	2.13043	1.81725	3.85076	4.26678	3.60404	3.70682	5.72013	5.35248	6.66293	5.45335
MSTRG.13812.2	1.92959e-05	1.24518	1.73734	3.61025	0.859029	0.911681	3.8489e-05	0.762554	0.599301	0.57435
MSTRG.13813.2	1.85281	0.771406	0.215212	0.152374	1.43862	2.07299	0.00107239	1.29113	1.19569	0.357713
MSTRG.13817.1	0	0	2.39514	6.44324	0	0	2.2904	0	0	0.750372
MSTRG.13818.1	0	0	0.440729	1.70147	0.196955	0.703221	0.925385	0.212446	0	0.601862
MSTRG.13828.1	0.128458	0.275362	0.894218	0	1.11162	0.554293	1.22643	0.858351	1.20716	1.13146
MSTRG.13829.1	0	0	0	0.585234	0.310239	0.892699	1.90638	0.865352	2.08979	0
MSTRG.13832.1	0	0	15.4642	0	2.54099	0	0	0	0	1.92092
MSTRG.13834.1	0.376643	1.47998	0.874087	1.22071	0.331172	0.753458	0.666107	0.660225	0.187111	0.884921
MSTRG.13835.6	1.12687	2.81132	1.7732	2.97102	4.71234	3.39409	7.83821	4.51216	4.44719	5.22058
MSTRG.1384.1	0.358164	0.776021	1.05637	1.70535	1.37421	1.0404	1.85669	1.1819	4.1717	2.32735
MSTRG.13849.1	0	0	0	0	1.00061	0	1.47148	1.03387	2.43242	1.4689
MSTRG.13859.1	0	0	0	0	0	1.17494	0	0.709419	1.74791	1.16609
MSTRG.1387.1	0	0	0.65886	0.630356	2.15181	0.304947	0.684109	0.940592	0.786856	2.34976
MSTRG.13870.1	5.01577	4.91366	9.51301	10.8202	10.8688	10.3322	13.1609	11.3399	15.226	13.2041
MSTRG.13870.2	2.2417	2.17717	6.89156	3.91788	3.3233	3.27787	6.8839	4.91634	5.10624	3.01666
MSTRG.13870.3	2.60749e-38	2.09111e-14	7.15661e-07	3.3679	1.1294	0.683679	4.18269	1.69363	4.59858	1.84527
MSTRG.13870.4	2.17505e-20	1.15574e-10	4.44462e-16	0.836997	0.870293	0.817664	0.885968	2.70889	0.9821	1.75921
MSTRG.13870.5	5.30829e-07	1.75253e-09	2.1288e-12	1.68194	0.611108	1.20374e-10	3.0748e-07	1.03338	9.2876e-08	0.658914
MSTRG.13870.6	0.000213429	7.95262e-05	5.79906e-05	8.06125e-05	8.16482e-05	7.0895e-05	1.20504	9.27529e-05	0.000238031	4.83631e-05
MSTRG.13870.7	3.48114e-36	4.94747e-15	1.47122	2.17746e-13	1.61838	0.337836	1.90372e-06	0.342998	1.60874e-14	0.941802
MSTRG.13873.3	0	0	4.0718	0	0	0	0	0.66856	0	0
MSTRG.13874.1	0	0	1.01087	0.973097	0.937017	2.04744	1.58666	2.66733	1.39283	0.668038
MSTRG.13875.1	8.71721	7.29636	14.3812	16.3533	18.3138	15.2583	22.0121	18.0321	23.7961	21.1544
MSTRG.13877.1	0	0	0	0	0.811545	2.52509	1.70789	0.86187	0	1.1717
MSTRG.13882.1	0.679838	0.56534	0.677865	1.18048	0.811112	1.04538	0.966735	1.48523	1.30976	1.42787
MSTRG.13884.1	2.45085	3.74023	8.61791	9.22755	7.74065	7.16273	6.52163	12.3734	15.9782	12.7842
MSTRG.13886.1	0.512203	0.274167	0.596427	0.994597	0.508072	0.392501	0.576682	0.505267	1.16583	0.762962
MSTRG.13888.1	1.42042	1.16105	1.46665	2.6472	2.21443	1.80579	1.17258	2.09452	2.50619	2.04027
MSTRG.13889.1	0	0	0	3.59815	0	0	0	0	0	0
MSTRG.13891.1	0	0	0	0	0.811545	0	1.70789	2.50725	5.32588	4.2634
MSTRG.13899.1	0.41346	1.91501	0.412398	0.673471	0.451231	0.380922	1.10314	1.45262	0.855662	1.127
MSTRG.139.1	1.42116	1.90835	1.93848	1.71916	2.36732	1.69319	1.68766	1.77708	1.33734	1.28405
MSTRG.13906.1	0.148821	0.477323	2.89375	3.34358	10.2195	5.50741	16.1118	8.76492	14.6828	12.4197
MSTRG.13912.1	0	0.648413	0.575336	0.552288	1.3949	1.06113	0.599907	0	0.664021	0.932862
MSTRG.13914.1	1.52873	0.844092	0.736629	2.81033	0	0.800891	1.52375	1.0501	1.19158	1.00625
MSTRG.13922.2	0.206587	0.220809	0.414838	0.538407	0.684147	0.591478	1.24936	0.758809	0.675235	0.987425
MSTRG.1393.1	0	1.1815	0.526768	1.0133	1.21299	1.08818	3.30369	1.7575	2.81866	2.95071
MSTRG.13936.1	11.9428	22.4181	27.1472	54.4151	42.2314	39.2855	41.7743	54.7518	11.9373	24.4555
MSTRG.1394.1	0	0	0	4.2039	3.35032	7.4936	8.97075	10.0297	10.2125	6.68762
MSTRG.13942.1	1.59875	2.45429	0.798082	0.440209	0.34698	0.585678	0.267112	0.359098	0.301738	0.578681
MSTRG.1395.1	0.466928	0.750271	0.232306	0.567952	0.668918	1.40605	1.36375	0.893351	0.174808	0.206829
MSTRG.13950.1	16.5556	15.862	18.6999	19.221	18.0331	17.7055	14.5072	16.647	10.5036	11.0559
MSTRG.13954.1	1.22938	2.87265	3.78199	4.56973	3.03695	3.48099	2.37517	2.24412	0.714682	2.58753
MSTRG.1396.1	0	0	2.18816	1.97539	3.12907	0	4.22132	1.09883	2.25625	0.694202
MSTRG.13960.1	0	2.3126	0	0	0	0	0	0.8097	2.62159	0
MSTRG.13965.1	0.242401	1.30592	0.239688	0.932896	0.212737	0.435399	0.508439	0.114966	0.0928371	0.0713319
MSTRG.13969.1	0	0	2.78358	0	0	0	0	1.21284	3.0871	0
MSTRG.1397.1	0	0	0	3.58991	0	1.17794	0	0	0	0
MSTRG.13970.1	0	0	0	1.64461	0.87353	0	1.76402	0	2.01642	0
MSTRG.13976.1	1.74105	1.245	0.720814	0.140821	0.127531	0.4207	0.307305	0.484296	0.601116	0.278531
MSTRG.13981.1	0.623812	5.21419	1.73731	0.970532	1.79595	0.409322	0.794393	0.715936	0.514789	0.290627
MSTRG.13996.1	4.72611	28.1483	20.7559	53.7082	115.481	99.313	52.765	43.3028	92.1016	66.9992
MSTRG.140.1	1.94525	0.930409	0.428	1.04223	1.29563	1.46322	0.227272	0.821588	3.25123	1.60501
MSTRG.14011.1	0	0	0	1.57426	0	0.77261	0.852741	0.38792	0	0
MSTRG.14013.1	0	0	0	0	0	0	1.51505	0	1.41918	0.505041
MSTRG.14014.1	0	0	1.00296	0	0.959319	0	2.04727	2.9394	1.23911	0.662904
MSTRG.14018.1	0.345447	0.556516	0.856927	1.00336	0.834967	0.0893912	1.82412	0.412178	2.47557	1.61295
MSTRG.14020.1	0	0.932553	0.807971	0.768277	2.6023	0.752974	0	0.771247	2.7673	1.82775
MSTRG.14023.1	13.2675	11.3508	14.0273	5.41672	3.96345	10.1082	5.14286	6.76665	7.95118	21.9496
MSTRG.14030.1	4.51883	3.23626	1.72936	0.812242	0.533861	0.758655	0.0580283	0.270271	0.0404101	0.502211
MSTRG.14032.1	0	0	0.277513	0.226806	0.696037	0.220574	1.38729	1.44428	1.13461	1.19182
MSTRG.14040.1	3.75527	2.04475	0.917928	2.65585	1.52469	1.64318	4.33252	1.97623	2.79606	2.08756
MSTRG.14042.1	6.61294	2.47399	0	0	0.477008	0.984228	0	0.970324	0.391159	2.10744
MSTRG.14051.1	0	0	0.789013	0	1.11208	0.367341	1.62782	0.753569	0	2.15228
MSTRG.14058.1	1.11638	1.89725	2.49675	2.60147	4.8598	3.38462	3.88288	3.19031	5.0624	3.98139
MSTRG.14059.1	2.96041	7.18788	10.3042	2.29756	3.67897	7.9439	2.44627	10.8629	0.961852	8.05446
MSTRG.14060.1	9.10756e-06	0.427269	0.818508	1.62136	1.43387	0.958534	0.878229	1.42821	1.69957	1.50277
MSTRG.14067.1	0	0	0	0.157054	0	0.072806	0	0	2.19201	0.249253
MSTRG.14068.1	0.597568	2.15612	1.90907	2.07101	3.37901	2.30581	2.32701	2.89576	4.61113	3.14486
MSTRG.14068.3	1.32202	2.90953	1.42591	2.28124	2.1183	1.2937	1.82039	1.37251	1.28009	1.11138
MSTRG.14071.1	0	0	0.449182	0.437336	0.762187	1.1525	0.953563	0.861936	1.45169	2.07448
MSTRG.14076.1	0	0	0	0	0.185892	0.35709	1.14577	0.348685	0.83508	0.609865
MSTRG.14077.1	0	0	0	0	0	0.638974	0	0.660278	3.15025	2.29017
MSTRG.14077.2	0	0	1.57058	0	0	0	0	0.713084	2.40033	1.69291
MSTRG.14078.1	0	0	0	0	0.773445	0.376585	0	0.785887	1.62009	0.281959
MSTRG.14079.1	0.156713	0	1.08936	0.303891	0.632215	0.644327	0.331541	0.447481	1.65184	0.544628
MSTRG.14082.1	1.25078	1.37217	0.606806	2.32705	1.16229	0.560386	0.631716	0.867125	0.721122	1.86568
MSTRG.14092.1	0.291236	0	0	0	0	0.825159	1.82373	0.687623	0.54675	0.84131
MSTRG.14094.1	0	0	0	0	0	0.926629	0	0	0	1.19043
MSTRG.14098.1	4.89007	6.30242	5.46626	5.64112	8.07689	7.37757	8.49386	7.25967	6.54337	6.11957
MSTRG.14099.1	6.56499	8.18723	6.79317	6.50852	6.40915	4.29686	5.11372	7.03486	7.12316	4.13866
MSTRG.14101.1	0.286015	0.920271	1.70533	1.38828	1.45751	1.55928	2.12074	2.17966	4.21183	2.21575
MSTRG.1411.1	0	0	0	0	4.3955	0	2.82906	0	0	0
MSTRG.14130.1	0	0	0	0	0	1.37121	0	0.475243	0	0
MSTRG.1414.1	13.2551	12.8865	21.9884	14.2186	21.9174	18.0026	23.0742	25.6986	39.4966	40.8364
MSTRG.14141.1	6.76487	5.37978	6.33395	4.87415	3.13252	4.26703	3.92892	4.72445	3.52453	4.51693
MSTRG.1415.1	37.076	53.6259	81.0761	61.7129	77.5044	73.0564	78.8192	75.4238	148.281	98.7687
MSTRG.14164.1	0.902698	3.01039	4.32057	5.74017	3.2644	5.74185	5.32826	2.03718	5.74643	5.29179
MSTRG.14179.1	0.854107	1.04589	2.06342	2.3735	1.70304	3.64991	2.97895	1.98348	1.24103	3.22878
MSTRG.1418.1	2.37094	4.03255	0.333315	0.323096	0.95876	1.0076	1.05552	0.479791	0.124842	0.7553
MSTRG.14192.3	1.11368	2.83303	2.97613	3.3366	1.5668	2.65333	4.83035	1.22416	0.740227	0.702357
MSTRG.14193.1	0	0	1.47769	0	0	0	1.47345	0	0	1.95262
MSTRG.14194.1	0	0	1.1026	0	1.05437	0	3.3594	0.539843	0.481756	0.398192
MSTRG.14199.2	0.825672	1.18011	3.49169	3.51647	4.86295	4.66212	6.08662	5.92468	6.27899	7.41106
MSTRG.14200.1	3.46524	0	0	0.465758	0	0.257912	0	0	0	0
MSTRG.14201.1	1.01266	4.52661	3.85692	0	0	0.452468	0	0	0	0
MSTRG.14203.1	12.6966	11.0434	4.29997	0.00806924	5.81461	3.04267	2.4794	5.95864	6.81571	4.71219
MSTRG.14203.2	5.79868	4.91891	7.09094	15.7517	7.49018	8.32806	7.1241	5.28042	4.19667	4.25577
MSTRG.14207.2	5.4163	1.58115	1.64008	0.161423	0.583932	1.2106	0.350972	0.391943	0.0909311	0.362702
MSTRG.14212.1	4.90746e-134	1.36626e-125	1.10242	1.02807	1.58345	1.55133	2.27591	2.06552	2.39426	5.36424
MSTRG.14219.1	0	0.92591	1.19764	1.66943	0.252597	0.25593	0.546308	1.80328	1.6827	1.44064
MSTRG.14220.1	0.577415	0.623503	0.854457	0.55326	0.126594	0.42916	0.301391	0.409513	1.07541	0.395063
MSTRG.14226.1	0	0	0	0	0	0	0	0	0	2.92715
MSTRG.14229.1	0	0	0	0	7.86791	6.86638	7.58908	3.90858	3.06622	1.20507
MSTRG.14233.1	0.382913	0.830606	1.50398	1.09152	0.192791	0.569877	1.18809	1.62545	3.30691	0.259177
MSTRG.14235.1	4.55985	5.20114	7.16419	9.50969	10.5852	10.5966	9.83451	11.7209	11.942	10.9536
MSTRG.14235.2	0.319601	0.940948	0.631204	2.13139	0.336232	0.853224	2.68004	0.592242	0.243169	0.793581
MSTRG.1425.1	0.0868322	0.461356	1.47156	0.239487	1.3369	1.10824	2.62808	1.55337	1.62891	2.04248
MSTRG.1425.2	0.1963	0.220204	0.508499	1.22687	0.339448	0.00236918	0.000272163	6.92447e-05	0.649997	0.419596
MSTRG.14251.1	0	0	1.54629	0	0	0	0	0.703827	0	1.72477
MSTRG.14258.1	0	0	0	0	2.04512	1.2921	0	0	0	2.47916
MSTRG.14263.1	0.135989	0	0.135183	0.528394	0.428617	0.394286	0.288298	0.453727	0.306874	1.20368
MSTRG.14268.1	0	0	0	0	2.18374	6.20414	0	0	0	0
MSTRG.14271.1	1.5851	9.26471	9.63573	4.58181	7.52387	5.89008	3.0922	4.29976	6.84212	4.55059
MSTRG.14290.1	0.850726	0.608247	0.140907	0.13766	0.978379	0.748907	1.50208	0.743151	1.60138	1.77083
MSTRG.143.1	0	0	1.02352	0	1.49098	0.481566	0	1.47599	0	2.69576
MSTRG.1431.1	2.85497	1.63546	1.74934	1.51439	2.0496	2.23986	2.42046	1.89354	1.59351	2.18936
MSTRG.14321.1	0.314627	0.338512	0.988739	1.54547e-06	0.730487	0.925402	1.33442	0.901115	0.947959	0.796559
MSTRG.14321.2	0.623996	0	0.517147	1.78566	0.0179435	3.96792e-06	8.22814e-07	0.00047165	5.30717e-06	0.00075779
MSTRG.14326.1	34.1911	33.2499	26.0107	20.6867	28.8071	34.4862	20.4947	17.6291	8.99489	13.4811
MSTRG.14329.1	0.495034	0	0	0.931517	1.82228	2.10555	1.01281	0	0.386867	1.5188
MSTRG.1433.1	0	0	0	0	0.541663	0.66392	0	0.579204	1.04399	0
MSTRG.14333.1	0.622456	0.672846	0.613386	0.595222	0.767129	1.27044	0.648353	0	1.16411	0.210478
MSTRG.14335.3	0.285895	0.000371123	1.58743	0.399935	0.00899699	0.351789	0.578554	0.441936	0.232101	0.520477
MSTRG.1434.1	0.51818	2.26239	0.505434	0.486549	0.257875	0.540199	0	0	0	0
MSTRG.14340.1	0	0	0	0	0	0	0	0	1.59831	2.62077
MSTRG.14342.1	5.3377	2.05569	2.06952	3.78073	1.31983	1.47639	1.00762	1.54911	0.620839	0.754283
MSTRG.14342.2	4.93429	2.51712	5.62868	4.40182e-05	0.430276	0.272507	1.08153	1.52228	3.79279e-06	0.854129
MSTRG.14344.1	0	0	0.973932	0.629603	0.144495	1.00405	1.02851	0.623364	0.497516	0.966877
MSTRG.1435.1	0	0	0	0	0.44333	0	0	0	1.19929	0.348682
MSTRG.1436.1	0	0	0	0	0	0.539357	2.31199	0.527464	1.93006	0
MSTRG.14375.1	0	0	0	3.85633	0	0	4.06212	0	0	3.30494
MSTRG.14382.1	1.47152	2.03551	0.832793	0.608528	1.10615	0.501004	1.99059	1.09919	0.953108	1.34373
MSTRG.14398.1	0	1.00346	1.72823	0	0	0	2.66413	3.68682	0.323512	0
MSTRG.1440.2	8.9783e-05	1.19124	1.57708	8.75856e-05	6.24087e-06	4.05988e-05	4.89768e-06	8.65526e-05	4.00764e-05	2.55508e-05
MSTRG.1440.5	2.56742	0.000532818	1.47252	1.7269	0.675832	2.25333	1.34442	0.973244	0.0983977	0.377898
MSTRG.14404.1	4.63171	3.34766	3.31021	3.5754	3.3449	2.76116	2.83765	3.05405	3.22323	2.77341
MSTRG.14408.2	0	6.49205	1.33534	0	0	0.255495	0	0	0	0
MSTRG.1441.1	0	1.31341	1.1026	3.10981	2.15435	2.17808	4.4792	2.61198	1.78898	1.50634
MSTRG.14422.1	0	1.6114	1.41081	3.36819	0.675331	0.709758	0.730726	0	0	0
MSTRG.14426.1	4.72074	9.11977	3.95772	5.86447	6.07476	5.33823	7.91029	6.43388	5.54625	8.78552
MSTRG.14427.1	0	0	0	0	0	0	0	0	0	2.09456
MSTRG.14429.1	0	1.31341	0	1.0366	2.0175	1.13685	0	0	0.412734	1.10315
MSTRG.14433.1	0	1.30721	5.1193	4.56944	1.78301	1.22372	0	0	0.762009	0.378999
MSTRG.14434.1	0	0.670723	1.52877	1.18684	0.271995	0.483084	0	0.440092	0.233985	1.09676
MSTRG.14441.1	0	0	0	0.738637	1.16156	1.22414	1.38319	0.233363	1.16317	0.440392
MSTRG.14441.2	0.330841	1.43181	1.95422	1.89489	2.10879	0.513249	0.536195	1.988	0.992316	0.646689
MSTRG.14442.1	0.73616	0	0	0	0	0	0	0.668608	0	1.00006
MSTRG.14445.4	1.42385	3.49951	4.60586	5.47611	5.83625	4.40806	7.70789	8.92719	6.96882	7.1115
MSTRG.14452.1	0.564347	0	0.278464	0.541055	0.410383	0.253361	0.294762	0.400789	1.38215	0.458096
MSTRG.14453.1	0	0	2.78358	0	0	0	0	1.21284	4.63065	1.00476
MSTRG.14454.1	0	0	0	0	0.923936	0.47646	0	1.48496	0.436855	0.3214
MSTRG.14466.13	1.21949	4.3976	21.4581	31.0163	45.8706	35.2583	85.371	60.8398	138.111	75.7455
MSTRG.14466.20	0	0	0	1.76273	0	0	0	0	2.88515	0.737782
MSTRG.1447.1	7.62136	0	0	5.63032	0	0	2.98336	1.38067	0	5.79229
MSTRG.14479.1	1.05694	0.569997	2.60993	2.53734	2.50657	1.12286	5.22277	3.47743	4.55423	3.9535
MSTRG.14499.1	0	0	0	1.31035e-24	1.02326	1.12411	0	0.484905	0.450969	1.32376
MSTRG.1450.1	0	1.81813	1.57803	0	0.796467	0	1.62782	1.90394	0.329395	0.796924
MSTRG.14507.1	2.5412	1.43774	0	3.35813	1.14242	1.23914	1.20806	1.72416	0.447269	0.405446
MSTRG.14509.1	2.12481	1.27155	2.56874	1.81824	1.99929	1.7209	1.48654	1.68871	1.16327	2.09848
MSTRG.1452.1	0	9.96683e-11	0.398647	6.38276e-08	2.47163e-10	7.42601e-07	3.65959e-07	5.9746e-08	171.308	0.568432
MSTRG.14527.4	15.1602	10.1208	7.94053	9.14178	4.99212	8.05524	5.40519	7.17383	4.42228	6.40945
MSTRG.14534.1	1.70202	0.22634	2.23143	2.27192	0.873332	0.880428	1.33563	1.25792	1.0426	1.57269
MSTRG.14539.1	0	0	1.44324	0.927115	1.10684	0.662628	1.00804	1.38907	0.93765	0.797773
MSTRG.1454.1	3.85045	4.6793	10.0507	15.2073	11.0257	10.4432	15.936	14.5341	10.513	10.048
MSTRG.14543.1	0	0.0220037	0.350699	0.24304	0.824745	0.45272	0.840855	0.297192	1.26467	0.552503
MSTRG.14553.2	2.21802	2.35819	2.24875	3.956	4.26073	3.89276	5.12587	6.17036	8.19315	5.50911
MSTRG.14558.1	2.9177	1.18568	1.07534	0.694207	0.343643	0.86998	0	0.342192	0.275289	0.613134
MSTRG.14563.1	0.467752	0.755696	2.54492	0.900773	1.72552	1.09876	2.94585	2.3308	3.51513	2.80986
MSTRG.14565.3	3.25621e-47	2.2982e-34	6.51019e-56	0.741141	0.975881	0.246465	1.02283	1.07184	2.72646	0.260065
MSTRG.14566.1	17.1814	13.8282	15.4943	19.8562	20.3824	23.4436	28.9684	26.1842	27.6257	21.7969
MSTRG.14572.1	0	0	0.474224	0	0.636513	1.84683	0.497013	0.68284	0	0.143826
MSTRG.14575.1	1.39385	0.569382	0.151736	0.325389	0.704831	0.554041	0.566858	0.472524	0.551667	0.299289
MSTRG.1458.1	0.496181	3.47332e-07	4.81366e-05	0.000170924	0.567594	0.000116171	2.17021	0.894771	0.00582597	0.253569
MSTRG.1458.2	1.87147	3.91468	6.41964	6.84271	6.56238	5.1117	8.07263	8.66473	6.41571	10.0952
MSTRG.1458.3	4.48679	2.6776	2.66112	2.50511	1.69541	3.1522	0.0610815	1.35439e-06	1.62333	0.689531
MSTRG.1458.4	0.224563	0.00105953	0.185229	1.89123	1.92534	2.15933	2.88302	0.438293	3.81359	1.50422
MSTRG.14581.10	3.30428e-109	2.84607e-71	0.622687	0.946274	1.66787e-33	0.703637	1.03467e-35	1.38524	2.02571	1.80752
MSTRG.14581.8	0.22774	0.938724	1.24109	0.568699	0.909476	0.410227	1.94274	1.35035	0.659166	1.08532
MSTRG.14581.9	3.34912e-88	0.595101	0.942	1.56332	2.03315	1.32977	1.52013	1.79925	1.99816	1.24249
MSTRG.14583.45	0.658415	0	0	8.40273	0.525839	1.58538	7.99471e-124	4.49673	3.58657	1.17633
MSTRG.146.1	0.770266	0	0.742103	0	1.71582	0.403586	0	0.709027	2.37239	1.93263
MSTRG.14606.1	2.20152	3.30528	2.20486	5.46828	5.14018	4.43347	7.22459	4.33157	3.48875	6.22661
MSTRG.14606.2	5.13764	4.59608	15.0413	18.6716	10.5833	9.20497	9.36359	14.2993	5.95388	9.28874
MSTRG.14606.3	3.56934	2.46576	5.785	1.5856	6.64358	5.42963	7.91865	6.48871	4.86424	7.39294
MSTRG.14609.1	2.27987	0	0	1.01515	0.986118	0.601821	0	2.55639	0.939374	1.49121
MSTRG.14615.1	4.31305	4.07346	4.07003	0.227444	0.208412	0.23833	1.39962e-05	2.9481e-06	4.44041e-05	0.102793
MSTRG.1462.1	0	0	0	1.37123	0	1.26421	0	0.457543	0	0.164469
MSTRG.1463.1	0	3.19113	0	0	0	1.70672	0	0	0	0
MSTRG.14630.1	0.346647	0	1.03186	0.503398	0.977381	0.514535	0.915177	0.824792	1.63181	1.87623
MSTRG.14631.1	0.552616	0.363042	1.14631	0.583026	0.632222	0.725479	1.13721	0.958282	1.22061	1.05259
MSTRG.1464.1	7.03454	11.1638	10.4851	3.79813	0	3.32505	2.03089	0.934529	0	1.47627
MSTRG.14642.1	4.77992	5.91904	4.21829	5.81938	6.63246	5.66823	5.57514	7.33434	5.262	5.59607
MSTRG.14656.1	0	3.46881	0	0	0	0	0	0.457633	0	0
MSTRG.14664.2	0	0.0035244	0.445478	1.06109	0.0120857	0.184232	0.680864	0.653324	0.695429	0.38315
MSTRG.14677.1	0.826079	0.448612	0.809947	0	0.595588	1.07414	0	0	0	0
MSTRG.1468.1	0	0	0.57204	1.09839	0.513619	0	1.19314	1.35936	0.214213	1.15522
MSTRG.14682.1	1.26664	2.0362	0.755835	1.55407	1.84849	1.09443	1.65614	1.69073	1.79473	2.17296
MSTRG.14683.1	0	0	0	0	1.20218	0.2276	0	0.948526	0.768164	1.19247
MSTRG.14689.1	0	1.82527	0.411653	0.795542	0.210785	0	0	0.394362	0	0.438031
MSTRG.1469.1	0	0	1.79634	1.64461	0	1.05908	0	0	0.873862	0.678889
MSTRG.14691.1	3.9426	5.4162	4.69799	3.51653	3.26098	4.12672	2.00162	1.72619	4.57654	2.88989
MSTRG.14716.1	0	0	0	1.80608	0.913573	0.975721	0.977021	0.910957	1.07256	1.61578
MSTRG.14732.1	0	0	0	2.35208	1.27072	0	0	4.9902	2.42863	0.947968
MSTRG.1474.1	4.16501	3.58721	3.83633	3.40255	5.00231	6.30966	6.22619	6.18027	2.83126	5.5339
MSTRG.14740.1	8.86641	6.37308	6.96984	6.49231	4.26207	5.81823	4.46149	5.67423	2.91387	4.94911
MSTRG.14746.2	0.210367	1.1006	0.637804	3.48106e-07	0.0537606	0.16452	0.169019	4.65842e-05	0.000243271	2.8458e-06
MSTRG.14761.1	0	2.59476	1.09057	1.02577	1.04288	3.55936	4.43293	1.01086	0.408231	1.48361
MSTRG.1477.1	0	0	0	1.67263	0	0	1.79348	0	4.72915	1.3855
MSTRG.14779.1	1.88846	1.20091	1.68566	4.01591	3.21756	2.6131	3.78458	3.95284	2.10355	2.96749
MSTRG.14790.1	0.996647	0	3.29751	2.57469	1.81332	1.03809	1.57988	2.45293	0.869102	2.78678
MSTRG.14797.1	0.308578	0.662259	0.459704	0.748139	0.746705	0.745691	0.979476	1.17742	0.924849	0.464646
MSTRG.14798.1	0	0	0	0	0	1.25103	0	0	0	0.987678
MSTRG.14810.1	0	0	0	2.14775	0	0	0	3.32049	2.53866	0.848689
MSTRG.14811.1	0	0.565598	1.01087	0	0	1.3505	1.58666	0.723647	2.10924	1.65132
MSTRG.14813.1	1.10216	2.47399	3.13479	7.87677	2.95273	2.23639	1.06426	1.02181	1.9558	6.0159
MSTRG.14817.1	4.54438	2.47269	4.00189	0.858177	1.50579	0.611446	4.20049	0.851721	0.520518	1.45865
MSTRG.1482.1	6.78504	4.62602	2.54188	0	0.584904	0.719602	0	1.20957	0	0
MSTRG.1483.7	8.32965e-07	2.00985e-06	35.5586	4.46073e-07	4.35509e-07	5.24229e-07	5.34854e-08	3.22812e-07	2.55636e-08	6.71542e-07
MSTRG.1484.1	3.45621e-28	1.81321e-31	7.28992	1.83583e-27	0.249213	0.250903	0.560501	0.132688	0.770981	0.924774
MSTRG.14843.3	17.9316	7.35491	0.000229367	0.481122	0.559915	1.08887	2.56412e-05	0.238879	0.000715731	0.668632
MSTRG.14843.4	3.8658	5.1144	6.00484	3.31989	0.390265	0.592261	0.782893	1.37022	0.47454	0.66744
MSTRG.14846.2	2.23601	0.21844	1.80549	0.774854	1.38862	0.839674	0.0199892	1.08814	3.95522	1.70797
MSTRG.14859.1	0	0	0	3.7905	0.626585	0.648178	0	0	0	0
MSTRG.14869.1	2.69296	3.39979	4.18885	2.37076	3.10228	3.64668	4.00845	3.32845	4.84794	5.56396
MSTRG.14875.1	0	0	13.3216	0	2.03545	0	4.06212	0	0	1.28325
MSTRG.14879.1	3.35914	1.60447	1.6654	1.08273	1.6388	1.32133	1.77131	1.51137	0.352117	1.40345
MSTRG.14884.1	4.01126e-05	0.804489	4.27217e-05	2.20942	3.16435	3.48261	1.62183	2.18604	4.57141	3.37911
MSTRG.14885.1	0	0	1.05912	1.52784	1.21948	0.566991	2.76729	2.02251	2.22392	0.695589
MSTRG.14886.1	0	0	0	0	1.16781	0.452962	1.04863	0.9503	0.124014	0.653691
MSTRG.14893.1	9.48436	10.6814	11.3624	15.0338	17.292	14.8654	15.3359	16.9936	17.1716	18.0954
MSTRG.149.1	0.234206	0.29848	0.558102	0.62569	0.6084	0.633341	1.30241	0.361577	0.589673	0.76129
MSTRG.149.2	0.475026	0.357048	1.4597	0.000294277	0.783061	0.0977475	0.201234	1.65749	1.19181	2.02409
MSTRG.14909.1	0.577405	0.526492	13.284	20.6156	21.4629	13.5238	16.975	14.0453	17.366	12.1563
MSTRG.14909.2	4.703e-15	7.57343e-23	1.23174	1.94252	1.01003	0.391266	1.48632	0.580312	1.91484	0.67564
MSTRG.14909.3	0.759017	0.000936852	0.539849	2.07384	7.73935	1.3532	3.07818	2.88141	4.72225	3.96442
MSTRG.14909.4	0.000136562	0.904203	4.54293	0.0325796	5.5878	4.87327	8.2833	3.42308	9.17976	4.81278
MSTRG.14914.1	8.58878	7.43068	2.1796	1.01765	1.32078	2.03645	2.79525e-05	1.1226	1.37204	1.23754
MSTRG.1492.5	3.36931e-74	4.06599e-166	1.36073	2.77595e-98	6.15195e-65	4.09793e-65	1.26443e-82	3.03396e-55	2.80214e-57	1.39566e-54
MSTRG.14932.1	1.77962	1.7206	0.529612	0.688872	1.01636	0.596109	0.563539	0.677867	1.27022	0.863378
MSTRG.14938.1	0	0.553605	1.4898e-06	6.36518e-06	0.658099	0.419218	0.404299	0.428506	1.41414	1.52646
MSTRG.14938.2	0	4.87723e-05	0.619426	1.20707	0.71425	0.962939	1.20572	1.53385	1.20218	1.61854
MSTRG.1495.1	0.505061	3.85656	0.492956	0	0.723953	0.752831	0	0.939967	0.18461	0
MSTRG.14953.1	0	0	0.373796	0.244237	0.751634	0.416754	1.26694	0.748156	0.94142	0.648462
MSTRG.14956.1	0	0	0	0	0	0	0	0	0	1.16906
MSTRG.14957.1	0.385496	0.823897	1.02559	2.3243	2.17884	2.78951	2.12663	2.40594	1.86279	1.81922
MSTRG.14959.1	0.191075	0.222593	2.30925	3.55062	3.35632	4.08572	5.66479e-10	1.60572	3.57148e-11	0.506822
MSTRG.1496.1	2.99998	0.545284	0.488136	3.29156	0	0.745236	0	0.471119	0	0.343834
MSTRG.1497.1	1.07545	0.192564	0.177795	0	0	0.185554	0.189172	0	0	0
MSTRG.14970.1	0.196218	0.367321	0.547509	2.11445	1.10932	1.21626	1.61478	2.48245	2.05377	4.95106
MSTRG.14970.2	1.83467e-09	0.213585	2.29836	0.8702	0.843741	0.312041	2.22476	1.52529	1.60749	1.07415
MSTRG.14970.3	0.55977	1.79606	8.62653	11.7063	5.1768	10.0274	9.58199	17.8392	14.8523	23.2946
MSTRG.14970.4	5.64505e-40	1.82896e-07	1.08318e-08	0.00146563	0.174861	0.694127	1.49641	0.0205692	0.718236	0.820421
MSTRG.14970.5	0.013593	0.011205	0.0465495	1.91809	1.07397	1.29189	2.57097	1.44935	3.65301	2.23933
MSTRG.14980.1	0.900544	1.21464	0.993856	0.97467	1.76163	1.43869	0.76041	1.43399	1.99074	1.31301
MSTRG.14991.1	0	0	0	0.549196	2.2603	1.58234	0	0.547286	3.45245	1.3232
MSTRG.14995.1	0.451007	1.12905	0.746691	1.60431	1.09163	0.861648	0.636506	0.645463	0.623915	0.929752
MSTRG.14996.1	1.01718	2.04403	7.58707	5.80965	3.63637	3.14937	7.68918	6.12698	8.53469	6.16024
MSTRG.150.1	0	1.65281	0	0	0	0	0	0	0	0
MSTRG.15000.1	0	0	0	0	0	0.270074	2.78842e-131	1.12012	0.219235	0.179186
MSTRG.15002.1	0.445801	0	1.32372	2.57804	2.03665	1.01329	1.63957	2.01132	4.525	3.01664
MSTRG.15007.2	0	0.901027	0.559472	1.91541	0.307041	0.560393	0	0.193712	0.161029	0.235099
MSTRG.15011.1	0.461553	0.496083	0.933062	0.905239	0.444877	0.446025	1.48966	0.441951	0.174275	0.171196
MSTRG.1502.1	1.76512	0	1.62155	0	3.85451	3.45389	3.21142	2.27561	3.51612	3.49177
MSTRG.15021.1	0	0.695057	0.614272	0.588746	0.276177	0	3.83549	2.05265	2.12289	0.838199
MSTRG.15025.1	0	0	0	0	2.03545	0	0	0	33.8123	0
MSTRG.1503.1	2.54952	1.39926	0	0	0.313989	0	0	0.291933	0	0
MSTRG.15037.1	0.965782	0.709409	0.67052	1.17768	1.02588	0.790731	1.1449	1.4567	0.873101	1.83911
MSTRG.15040.1	0	0	0.471982	2.27479	0.211152	0.21661	0.494719	0.90386	1.42656	0.802948
MSTRG.15044.1	0	0	0	0	4.3955	0	0	0	0	0
MSTRG.15045.1	0	2.00782	0	0	0	0	0	0	0	0
MSTRG.1505.1	0.69031	0	1.33534	0	0	1.3405	0	0.953015	0	0.235361
MSTRG.15055.1	0.52672	0.564622	1.17836	2.30333	1.6999	1.46795	0.977496	1.00461	0.992104	1.22093
MSTRG.15056.1	8.43806	5.94452	5.85457	6.17953	10.6542	9.986	9.76237	8.38209	12.0292	5.86261
MSTRG.15060.2	2.60884	0.954762	2.58884	1.54799	0.467514	0.868541	1.32541	1.48024	1.36134	1.39826
MSTRG.15079.2	0.364274	0.429513	1.37228	1.88262	0.68129	0.63222	2.69218	2.48303	1.5237	1.85567
MSTRG.15084.1	0.317165	0	0.312452	0	0.738232	0.306997	1.981	1.05037	1.18598	1.34328
MSTRG.15089.1	7.49922	5.07284	3.28076	2.01785	0.6551	0.966092	0.244811	0.624433	0.230053	0.495301
MSTRG.15099.1	0.138635	0.148658	0.137796	0.673183	0.640479	0.215096	0.587658	0.662031	1.57093	0.285918
MSTRG.15100.1	0.419996	0	0.411653	0.397771	0.843139	0.188406	0	0.793178	3.43684	0.408617
MSTRG.15101.1	0.171535	1.47375	3.40433	5.31503	2.50012	3.23283	6.34127	3.18594	5.67287	4.67718
MSTRG.15110.1	0.587328	2.73636	3.10457	3.02646	8.03363	4.05727	8.66378	5.21686	29.5433	3.96761
MSTRG.15124.1	3.26157	0.59405	1.05912	0	0.269935	0	0	0	0	0
MSTRG.1513.1	2.54873	4.49159	5.0431	4.90918	3.48534	3.84994	4.62193	4.06883	2.0253	2.98082
MSTRG.15136.58	1.00958	0	1.72178	2.11365	2.04934	2.40242	0.429238	1.44183	1.66603	2.8688
MSTRG.15137.2	0	4.57531	4.86814	3.6799	2.74932	0.457071	9.95149	2.10764	4.11874	6.20224
MSTRG.15137.3	0	0	0	0.943403	0.877148	1.02813	0	1.05773	0.399609	0.735165
MSTRG.15139.1	0	0	0	0	0.195684	0.230959	0	0.317605	0.247922	1.02544
MSTRG.1514.1	0	0	5.56716	2.46892	1.34301	1.73067	5.24854	5.25519	0	1.10575
MSTRG.15144.1	0	0	0.172869	0.168665	0.561369	0.360699	0.183978	0.580322	1.38336	1.03185
MSTRG.15146.1	2.90816	0.636759	0.565559	0.543115	0.287887	0.824889	0.590004	0.267696	0	0
MSTRG.15154.1	0	0	0.80817	0.768632	0.731677	1.19486	0	0	0.979203	0.785894
MSTRG.15158.1	0	0.466328	0	0	1.5565	1.18546	0	1.00539	0	0.145274
MSTRG.15167.1	0.267064	0.576178	1.84625	1.53832	6.18841	2.74943	6.42613	2.5306	22.5717	4.18476
MSTRG.1517.1	0	0	1.32011	1.82936	1.34581	1.51751	2.4666	1.69066	1.83421	1.70877
MSTRG.15172.3	1.45928	0.475015	1.23665	1.48205	2.06066	1.72654	1.64513	0.984033	0.315928	0.919041
MSTRG.1518.1	0	0	0	0	0.441151	0.182144	1.78773	0.627333	1.27233	0.867952
MSTRG.15189.1	5.16439	0	0	0	4.06199	0	0	5.66319	4.09206	2.90011
MSTRG.15190.1	0.567754	0.455175	0.283118	0.554773	0.506892	0.621725	1.13586	0.748468	0.61381	0.747303
MSTRG.15194.1	0.276118	0.148037	0.686136	0.938592	0.698517	0.409664	1.60944	0.856344	1.97624	1.8412
MSTRG.15199.1	0	0	0	0	0.674658	1.53494	0	2.66064	0	0
MSTRG.15206.1	1.64098	0.252497	1.15947	1.57998	1.06219	0.93942	0.738153	1.11246	0.885808	0.93055
MSTRG.15208.1	0	1.20886	1.02352	0	0.512053	2.40783	2.08711	2.4518	1.26716	4.30536
MSTRG.15210.1	0.770234	1.53631	0.261073	0.696756	3.17938	2.76126	1.6525	1.14929	2.14324	1.08112
MSTRG.15220.6	1.96263	10.2177	1.1841e-27	0.11969	0	0.000431855	0	0	1.5229	6.14227e-61
MSTRG.15233.1	9.22638e-05	2.22631	2.20847	1.91763	2.32277	1.74992	0.045549	2.39506	1.19768	1.5342
MSTRG.15233.2	1.91357	0.000491087	1.66647	3.36137e-05	4.33114e-05	8.51992e-06	5.3493	5.42277e-05	0.525305	1.00411
MSTRG.1524.1	3.23074	3.5751	1.55348	3.69829	0.702441	0.423518	0.801743	1.10645	2.98372	2.12189
MSTRG.15246.1	29.7226	110.466	38.1694	53.4099	25.0362	45.6779	16.7708	29.7672	5.76132	26.5103
MSTRG.1525.1	0.391941	0	1.15406	1.11636	0.51473	0.58338	0.405009	0.185188	0.591943	0.658159
MSTRG.15255.2	6.98447	7.4458	2.45308	2.05425	2.05502	1.7801	0.757361	2.52317	2.49435	2.05854
MSTRG.15256.1	0.657322	0	0.647184	1.25518	1.47408	1.397	0.341744	1.86139	0.98588	0.214004
MSTRG.15259.1	4.36045	0	0	0	0.51715	0	1.0538	0.960693	0	0.328644
MSTRG.1526.1	0.834719	0.924883	0.801682	1.52531	1.45127	2.36968	2.47937	4.23156	0.635438	2.72054
MSTRG.15260.1	0	0	0	0	0	0	0	0	0.514827	1.5006
MSTRG.15268.1	33.1927	22.5713	5.01124	5.55448	10.9734	7.24772	2.57872	9.13191	9.38274	8.03659
MSTRG.15272.1	0	0	0	0.128972	0.466774	0.0596401	2.11113	0.253464	1.79841	1.28254
MSTRG.15273.1	0.412608	0.221917	1.4856	1.99137	4.1839	3.48549	4.4723	4.11313	5.22939	4.76364
MSTRG.15273.3	2.56649	3.56346	4.01161	2.27397	13.0929	5.6767	12.9294	7.99505	28.2644	13.0488
MSTRG.15274.1	2.67451	1.91293	7.25345	9.01735	8.84527	9.2546	10.3678	8.28576	14.5188	10.7066
MSTRG.15287.1	0	0.529	0.948448	0.457078	0.242241	0.252841	1.98805	0.901187	1.26703	0.652618
MSTRG.15290.1	0.163286	0.0871507	0.856256	0.799954	0.775325	0.554617	0.961183	0.783783	1.52702	1.0911
MSTRG.153.1	1.4998	0	0	0	0	0	0	0.638834	0	0.513589
MSTRG.15306.1	0	0	1.60336	0	0.767252	0.811388	0	0.751728	1.90632	0.529637
MSTRG.15323.1	0	3.1294	3.86195	3.60485	3.78149	1.83859	3.88672	1.81699	2.12034	0.47054
MSTRG.15324.2	0	1.09663	1.87418	0.886721	0.852276	2.42987	0	0.914025	1.54964	0.925516
MSTRG.15329.1	0	0	0	0.974814	0	0	0	0.480346	0.387112	1.72207
MSTRG.15333.12	0.414834	0.171158	1.04405	1.13986	0.376293	0.672661	1.71659	0.947138	1.61401	2.29271
MSTRG.15343.1	37.745	23.5334	21.7258	10.7002	6.12852	8.85632	7.55582	8.84392	1.67133	6.29128
MSTRG.15347.1	11.1917	18.8927	10.2211	5.50132	3.44677	2.25702	3.56284	3.04763	2.04978	2.63981
MSTRG.15348.2	3.43102	4.91364	6.481	2.59143	7.45474	5.73878	7.12997	6.76708	6.49303	9.03338
MSTRG.1535.1	3.53024	2.04642	3.24309	1.49437	4.61033	3.45389	3.21142	3.1473	5.8186	5.60692
MSTRG.15358.1	0.116971	0.624821	1.45915	1.65919	1.49319	1.12195	1.43712	1.23554	2.09856	1.58701
MSTRG.15359.1	0.33881	0.478959	1.41762	1.60034	1.71267	1.4206	1.82442	1.53284	2.48868	2.05002
MSTRG.15360.30	0.790711	1.37636	1.63648	1.82248	2.86767	2.20981	2.58647	2.0604	4.25052	3.75231
MSTRG.15361.1	0	0	0	0	0	0.727314	0	0	0	2.58574
MSTRG.15361.2	0	2.01158	1.39601e-125	0	2.19701	0.241979	0.960483	0.624222	1.82058	0.77622
MSTRG.15361.4	0	1.97447	2.13859	0.449788	1.07103	7.826	3.8368	2.37393	2.31304	4.07844
MSTRG.15361.5	0	1.47655	2.93713	0	0.597885	1.68391	1.47363	0.971061	4.00245	2.27539
MSTRG.15361.7	0	1.10766	0	1.34307	0.585468	1.66191	1.40215	0.64602	1.30705	1.32359
MSTRG.15362.1	0	0	1.76236	0	0.884452	0	0	1.4951e-219	0	0
MSTRG.15363.1	3.24492	7.38226	4.62572	5.8648	11.8056	8.86751	6.83222	7.5042	17.3551	9.95369
MSTRG.15397.2	0	2.86386	0	0	0	1.2921	2.07001	0	1.11629e-252	0.826387
MSTRG.15397.3	9.48895e-06	7.79561e-229	1.07062	3.52398e-251	8.23383e-43	1.37157	0.676579	0.371624	2.27943	0.475522
MSTRG.15397.4	9.32756e-33	3.81756e-133	0	8.78607e-279	2.06985e-111	1.01053	1.3962e-224	7.9207e-89	0.142351	0.320834
MSTRG.15397.5	0	5.2325e-286	0	4.60513	4.55577e-69	3.51316e-258	0	2.64968e-183	2.43746e-174	1.61257
MSTRG.15397.6	0.0914978	2.22253	1.08246e-196	1.48215	1.2359	1.35926	5.58914	0.405008	2.33982	1.26227
MSTRG.15397.7	0	5.4494e-56	9.74961e-286	0	1.45216	0	2.40998	4.65348e-170	0	3.96447e-152
MSTRG.15397.9	5.42103e-181	3.85553e-169	0.730385	1.51734	0.349524	0.450565	1.01473e-80	0.555316	2.04455e-71	0.647757
MSTRG.154.1	0	0.733191	0	1.93858	0.467985	0.479916	1.40736	1.11685	0.374526	1.32534
MSTRG.15404.1	0.588495	0	1.14408	1.09839	0.256809	0.614391	1.19314	1.08277	0	0.980333
MSTRG.15411.1	0.881596	2.09857	1.73423	0.777561	1.8183	1.93665	2.80384	1.46752	2.67929	2.07346
MSTRG.15411.2	0.00145402	0.505751	0.567613	2.16889	1.49061	1.0338	2.45313	1.67554	0.557535	0.67062
MSTRG.15411.3	0.324109	0.658416	0.732224	1.50351	0.745202	1.20162	1.91542	1.01442	0.80399	1.68531
MSTRG.15412.1	0	0	0	0	1.78738	0	0	0	0	0
MSTRG.15429.1	0	0	0	0	0	1.47589	2.75748	0	4.38213	1.06699
MSTRG.1543.1	8.6722	2.00782	1.59566	2.94392	0.743052	0.770041	3.16408	2.30585	2.9857	2.187
MSTRG.15430.1	1.48327	2.45431	1.43103	0.683017	1.33067	1.10873	0.740822	1.0204	1.12708	2.70746
MSTRG.15432.1	0	0	1.17782	1.13002	0.828584	1.81002	0	0.569728	1.13973	0.806735
MSTRG.1544.1	0	0	1.09101	1.76043	1.78292	0.909175	0.766576	0.869191	2.63172	0.568396
MSTRG.15452.1	0	0	0	0	0	0	0	0	0	2.1306
MSTRG.15454.1	0	0	0	0	0	0	0	0.633048	0	2.26375
MSTRG.15458.1	8.71662	2.11881	1.95909	1.43415	1.16889	0.880041	1.04301	1.96014	0.556984	0.639911
MSTRG.15465.1	0	0.645172	0.896029	0.291692	1.14651	0.726561	0.795633	0.645463	0.964457	0.872155
MSTRG.1547.1	0.427185	0.763586	0.141506	0.414725	0.584532	0.348904	0.754211	0.408472	1.13037	0.287339
MSTRG.15475.1	1.02287	1.01875	1.32864	1.25126	0.829025	1.00932	1.60673	1.40739	1.25096	1.43401
MSTRG.15476.1	0.377732	0.508155	0.614017	0.904571	0.614429	1.113	1.02518	1.26289	1.61841	1.07095
MSTRG.15482.1	0	1.43774	0	0	0.594002	0.566542	0	0	3.65281	0.405446
MSTRG.15485.1	0.540555	1.15147	1.13605	1.06226	0.761546	0.590718	1.10428	0.858393	0.916482	1.0065
MSTRG.15486.1	0.758418	0.629311	0.591229	0.996154	1.29361	0.730118	1.44678	1.01384	1.58434	1.7865
MSTRG.15488.1	0.296429	0.960615	0.292325	0.287546	0.67023	1.03517	0	0.420751	0.67504	0.618633
MSTRG.1549.1	0	5.68576	7.48269	0	1.83052	0	3.44763	1.93443	0	2.20508
MSTRG.15495.1	0	0.433868	0.199862	0.584362	1.23908	1.18421	0.637234	0.479656	0.838523	0.914396
MSTRG.1550.1	0.854382	2.78574	2.92989	0.404329	0.80233	0.574876	0.439909	0.201653	0	0.721971
MSTRG.1551.1	0.686898	1.36534	1.56372	1.91297	2.01328	1.27661	1.04415	1.83054	2.18268	2.39822
MSTRG.15525.1	0	0	0	0	0	0	3.67219	2.0766	11.2877	2.65227
MSTRG.15533.1	0	0	0	0	0.332053	0	0.679773	1.23481	0	0.432431
MSTRG.15536.1	115.222	86.9474	44.7239	51.3	61.089	48.4776	41.1891	63.0993	63.4123	68.754
MSTRG.15556.1	0	0	0	0	2.68107	0	0	0	0	0
MSTRG.15558.1	0.814278	0	0	0.745277	0	0	1.61556	0.367303	0.586195	1.64504
MSTRG.15559.1	0	0	0	0	1.70455	0.439196	0	0.457012	0.750423	0.619242
MSTRG.15571.1	0	0	0	0	0.196596	0.185656	0.202386	0.456861	0.289091	1.17482
MSTRG.15573.1	3.32033	1.49306	3.00444	2.12323	1.27126	2.19971	2.31356	1.70264	1.55216	2.77052
MSTRG.15581.1	2.32875	3.06914	4.34598	8.20348	5.47611	4.54191	5.41848	7.8474	10.1137	6.72258
MSTRG.15588.1	0	0	0	10.9776	1.17416	4.51338	2.34014	1.23852	0	1.83328
MSTRG.15593.1	0	0	0	0	0	0	0	0	1.59831	0
MSTRG.15595.4	0.562167	0.554352	1.07149	1.18813	0.720188	1.1108	1.08633	1.07569	2.05319	1.30593
MSTRG.15596.1	3.88223	2.3755	2.58438	1.84693	2.90685	2.50143	2.99615	2.36046	3.27973	3.72612
MSTRG.156.1	3.94648	4.87289	0	0	0	2.08331	0	0	1.92164	0
MSTRG.15601.1	1.80798	1.86339	1.86847	1.45227	1.09731	0.950513	1.31011	1.70309	0.789091	1.4244
MSTRG.15608.1	0.125666	0.13428	0.564215	1.16739	0.976015	0.756513	0.939374	0.662658	0.75679	1.0634
MSTRG.1561.1	0	0.443002	0.400105	0.386792	0.178548	0.183025	0.841821	0.385359	6.79881	0.523238
MSTRG.15610.1	0	0	0	0	1.14861	0	0	0	0.431785	0
MSTRG.15611.1	0.249693	1.10483	1.57849	2.78591	1.66893	1.37931	2.1844	1.95333	0.829772	1.68342
MSTRG.15621.1	0.219952	0.94699	0.870934	1.48435	1.51138	1.70181	1.61835	1.2535	4.72301	1.8815
MSTRG.15626.1	0	0	0	0	0	0	0	1.69878	0	0
MSTRG.15629.3	3.13339	2.33797	0.992989	0.937557	0	1.10068	1.01396	1.43183	0	1.03971
MSTRG.15630.1	1.50565	0	1.45184	0	0.327654	0.337005	0	0.693651	0.572169	0.990215
MSTRG.15631.1	0.454438	3.5826e-15	2.65503	2.91371e-21	1.28979	1.13661	0.933442	2.05776	14.9712	1.92227e-12
MSTRG.15631.2	0	0.600766	7.50889	0.514624	1.04303	1.25091	5.03631e-17	0.33799	4.49537	2.53288
MSTRG.15632.1	10.4047	10.8294	11.5098	5.55386	13.7187	15.0498	13.9409	12.0595	42.6438	19.2975
MSTRG.15635.1	0.745135	2.59221e-06	1.12277	1.58929	0.00179511	1.27271	1.22034	1.1367	1.39097	1.7459
MSTRG.15636.1	0.591096	0.7381	0.75859	1.34432	1.78949	1.099	1.782	1.27179	0.565536	2.07766
MSTRG.15648.1	7.51738	7.5956	6.74848	4.321	11.1278	9.49674	5.28097	4.58214	12.9728	8.54769
MSTRG.15668.1	0	0	0	2.29756	2.47406	1.58878	0	0	0	0
MSTRG.15673.1	0.430882	0	2.11048	1.22307	0.809102	0.610744	1.33065	1.61732	0.967339	1.62603
MSTRG.15677.1	1.07547	0	0	1.51214	0.704549	0.280405	0.547802	1.50458	0.392465	1.16687
MSTRG.15679.1	2.97758	1.38681	2.08404	2.01335	2.82372	0.633405	2.19056	2.19722	1.58859	2.34378
MSTRG.15685.1	0.48539	0.521046	0.642525	0.470408	0.983985	0.810597	1.19742	1.00261	0.855051	0.750143
MSTRG.15686.2	3.03746	0	0	0.32961	0	0.155162	0	0	0.133499	0.102042
MSTRG.15698.1	0	0.222848	1.23122	0.199949	1.16626	0.279131	1.09014	0.886496	0.230599	0.879027
MSTRG.15702.1	0	1.1312	0.505434	0.486549	0.905523	0.540199	2.11554	0.971839	1.13569	0.663344
MSTRG.15703.1	0	1.41793	0.625823	0.599539	0	1.01225	0	0.598481	0.234343	0.192178
MSTRG.15711.1	18.2613	18.0371	16.7648	10.9236	12.7341	12.8926	13.4855	13.7726	14.6027	15.2172
MSTRG.15711.2	4.24797e-27	1.10276	5.34111e-17	7.41715e-15	2.70656	2.96421	2.3621e-28	1.23553	2.98685	1.51768
MSTRG.15711.3	2.34708e-13	0.00402573	1.64581e-14	1.91954	1.25258e-08	1.7102e-08	3.60639	0.0149631	1.43573e-08	0.000349984
MSTRG.15723.24	2.13266	1.13349	0.235694	0.509858	1.22198	0.618104	0.528977	0.791036	0.378882	1.05494
MSTRG.15724.1	4.71749	0	0.596887	0.54559	1.8425	0.250473	0	0.543204	0.21948	0.985678
MSTRG.15724.2	0	0	0	0	0	0	0	4.02339	0	5.70773e-67
MSTRG.15724.3	0	0	0	1.20795e-289	0	0.671655	1.18654	0.88039	1.70394	1.90234
MSTRG.15724.4	1.31965e-237	0	0	0	4.81483e-160	0	0	4.15879	0	1.23343
MSTRG.15724.5	4.95652	6.1717	0	3.48005	3.03938e-177	8.63201	4.73222	4.85604	1.48235	3.66023
MSTRG.15725.1	1.26532	0.458284	2.06679	1.99695	1.68802	1.66465	2.1728	1.78082	0.473466	1.6823
MSTRG.15734.1	0	0.711447	2.24344	0.902807	6.3427	1.88817	0.985196	1.3275	12.5215	1.60102
MSTRG.15743.1	0	1.9348	0	0	3.75388	0.894524	0	0.703827	1.30192	0
MSTRG.15744.1	0	0	0	1.14551	1.17035	0.690641	1.23589	0.601117	0.544741	1.22454
MSTRG.15750.1	19.2252	12.676	9.29417	20.2053	13.3353	12.8818	8.93705	15.1699	4.54334	8.08054
MSTRG.15753.1	2.77426	4.22622	2.51366	2.87171	2.55455	3.13695	3.4937	2.45782	1.70735	2.56743
MSTRG.15755.1	0	0.924883	0	0	0.404434	1.55829	0	0.751728	0	0.813569
MSTRG.15757.1	0.124429	1.06817	1.7419	1.46739	0.927681	0.953697	0.727364	0.596828	0.691768	0.954597
MSTRG.15758.2	2.1369	2.12912	0.909635	0.592184	0.704753	1.15953	0.969145	1.09234	0.805027	0.996867
MSTRG.15759.5	0	4.84177e-05	0.677125	1.04483	0.879662	0.743454	2.93883	1.05386	4.76877	1.09665
MSTRG.15764.1	0.331204	0.236458	0.329665	0.64495	0.852196	0.853413	0.938629	1.32002	2.41115	1.28461
MSTRG.15765.1	0.435221	0.348655	1.35756	1.17126	2.27011	1.09977	2.32582	1.22834	2.27774	1.41513
MSTRG.15766.1	0	0	0	0	0.685171	0.709462	1.47345	0	0	0.97631
MSTRG.1577.1	0	0	0	0	2.0794	0	0	0	0	0.765549
MSTRG.15776.1	0	0	0	0	2.95079	0	0	0	3.95761	0
MSTRG.15790.1	0	1.58807	0	1.21651	0	0.740295	0	1.19859	0.488109	2.18065
MSTRG.15791.1	2.65933	2.9984e-08	8.12951e-09	7.55718e-09	1.45263e-08	4.07486e-07	1.39085e-06	2.48456e-11	1.00502e-07	0.977434
MSTRG.15792.1	0.152717	3.61688	3.70777	2.8926	2.09361	2.0341	2.16892	2.9366	2.95534	1.69707
MSTRG.15794.1	0.588916	0.315874	0.29255	0.571489	0.701883	0.416909	0.779435	0.842726	1.05415	0.83101
MSTRG.15797.1	0	0.584253	1.27653	0	1.32761	0.0686528	1.79643e-136	1.37082	1.87853	0.860327
MSTRG.15797.2	0	0	0	0	1.11525	8.5762e-133	0	0.387219	0.843676	0.447253
MSTRG.15797.3	0.207592	5.31849e-146	6.30997e-116	0.601071	0.174237	0.93266	1.33176	0.644742	1.00827	0.926247
MSTRG.15798.3	0.00114267	0.0135399	0.0136535	0.0129432	0.0123257	1.40207	0.013973	0.0133165	0.0095132	0.0130282
MSTRG.15798.5	1.02741	1.55031	2.23695	1.29821	2.79973	0.996775	1.44832	0.594556	0.827837	1.27571
MSTRG.1580.1	0	0	0	0	0	0.729802	3.88672	0	0.963649	0
MSTRG.15801.2	0.313179	0.447054	0.207879	0.813577	0.620683	0.497293	0.555054	0.648757	1.42328	0.654961
MSTRG.15802.1	0	0	1.36546	0.514624	7.82785e-67	0.64773	1.06488	0.517153	0.687221	0.769655
MSTRG.15806.1	1.576	5.49048	8.74926	25.0155	7.80126	11.4275	7.38181	14.6714	3.76448	23.5316
MSTRG.15809.1	0	0	0	0	0	0	7.17617	1.27049	8.71959	0.987678
MSTRG.15811.1	15.6156	10.7864	10.3606	12.2263	14.0075	10.8375	13.1044	14.8176	11.5329	11.0223
MSTRG.15826.1	0	0	0	0	0	0	0	0	0	2.66826
MSTRG.15827.1	0.180539	0.775879	0.537211	0.524014	0.251123	0.5113	0.571551	0.343474	1.08917	1.05332
MSTRG.15834.1	0	0.685873	0.312452	0	0.160602	0.164636	1.32067	0.448266	1.06379	0.980883
MSTRG.15835.1	0	0	4.60449	0	9.06169	4.69341	4.2086	10.1825	31.4142	3.61165
MSTRG.15838.1	0.146986	0.110371	0.730274	0.502234	1.88004	1.17826	1.31575	0.863381	2.38853	1.81227
MSTRG.15839.1	0.205696	0	0.312073	1.25768e-05	0.000232231	0.00317115	8.82378e-05	0.246736	0.976175	1.19335
MSTRG.15840.1	0	0	0	0	0.285136	0.293	0	0.306885	0.733517	1.05565
MSTRG.15844.1	0.239489	1.62201	1.80862	2.48436	0.921129	1.85241	1.36163	0.726181	0.600765	1.15684
MSTRG.15849.1	0.302173	0.903981	4.46257	7.15224	16.3922	10.5024	25.692	21.3457	23.7373	22.3896
MSTRG.15851.1	0	0	0	0	0	0	0	0.986271	5.08952	1.2695
MSTRG.15861.1	0.083019	0.621548	0.330988	1.21548	1.13585	0.716226	1.3271	1.07227	0.811621	1.47819
MSTRG.15865.1	3.72807	8.68618	1.70449	6.26359	7.20653	4.47524	8.40573	9.24678	11.5523	7.9936
MSTRG.15866.1	0	0	0	0	3.01995	0	2.90427	2.68758	1.15837	0
MSTRG.15870.1	9.91303	0	0	0	0	0	0	0	0	0
MSTRG.15877.2	0.342191	0.370429	0.673374	0.32632	0.795547	0.96952	4.26405	1.13015	1.75319	0.771866
MSTRG.15882.1	0	0	0	0	0.903896	0.909034	1.82395	0.928888	1.39423	3.53582
MSTRG.15894.1	0	0	0	0	0	2.29508	2.44363	0	0.536942	0
MSTRG.15897.1	0	0	0	0	0.664462	1.51091	0	1.36444	0.537153	0.957676
MSTRG.15898.1	0	0.534319	0.957545	0	1.10148	0.439587	0.501664	0	0.72936	0.871557
MSTRG.15899.1	0	0	1.70449	0	2.42534	0	8.40573	0	5.87136	1.11645
MSTRG.159.1	5.65155	3.0912	0.549982	1.05697	1.05368	1.93939	2.29682	1.04195	2.32649	0.863023
MSTRG.15905.1	10.4776	6.71757	6.86136	6.04648	7.15619	8.10901	12.6981	11.0825	9.6828	11.476
MSTRG.1592.1	4.00408e-08	0	0.826316	0.820116	1.10867	1.06749	0.901567	1.41671	0.403679	0.818489
MSTRG.15920.1	0	0.602301	0.550782	0.267576	0.122364	0.289438	0.874665	0.264132	1.04357	0.659401
MSTRG.15921.1	0	0	1.04397	0.507468	0.115908	0.629935	0.276514	0.37563	0.590173	0.647334
MSTRG.15927.1	0	0	1.52968	0.728672	0	1.54471	0	0.359123	1.46368	1.01057
MSTRG.1593.1	0	0	1.70449	0	0	1.82445	0	1.69317	1.45518	2.56146
MSTRG.15930.1	0.885417	0.521365	1.82696	1.69734	1.88464	2.26498	1.9489	1.16942	0.946496	1.17073
MSTRG.15935.1	0.206055	1.28054	2.95507	3.7031	2.05447	4.43346	4.28552	4.29556	1.37961	5.45215
MSTRG.15937.1	0	0	9.14887	6.17409	1.09364	1.13186	4.3938	6.76734	7.06506	1.61063
MSTRG.15938.1	0	0	0	0	0	0	0	2.42568	0	0
MSTRG.15939.1	0.733805	0.261944	0.243613	2.14191	1.02561	0.57929	0.527776	1.06243	0.459094	0.534407
MSTRG.15947.1	1.47721	2.21375	2.94297	3.8404	2.72901	2.58932	4.29718	2.92133	5.75454	3.05557
MSTRG.15949.1	5.16892	4.6865	3.41063	4.07487	5.30868	6.8632	5.07741	5.14153	5.44752	6.51241
MSTRG.15949.2	1.00143	0.639645	1.02035	2.24292	1.15813	1.29892	1.32673	1.77032	2.45758	1.81253
MSTRG.15950.1	0.260935	0.277629	1.19982	0.601917	0.80294	0.539154	1.36284	0.763014	1.04035	1.13878
MSTRG.15955.1	0	0	0	0	0	0	3.92432	6.70774	0	0
MSTRG.15960.1	0	2.53063	3.8705	0	2.73628	0	9.44045	1.93278	7.4041	0.624056
MSTRG.15966.1	0.339506	2.56936e-298	1.36268	0.651279	0.997641	1.79113	0	1.31186	4.10494	0.719808
MSTRG.15985.1	0	0	0	1.49437	0	0.943544	0	0	0	1.62757
MSTRG.15986.1	0	0	0	0	0	0	4.06212	0	0	0
MSTRG.1599.1	1.25038	1.23735	2.10018	2.87601	2.20085	2.21948	3.19017	2.24462	3.80499	3.25295
MSTRG.15993.1	6.15687e-12	5.15834e-08	2.22732e-10	0.292743	0.477001	5.08994e-06	8.4999e-06	1.08729	1.48774e-08	0.118776
MSTRG.15997.1	0	0	0	0	0.319788	0	0	1.21208	0	0
MSTRG.15998.1	0	1.26647	0	1.00476	0.48759	1.7846	0	0	1.32727	1.72601
MSTRG.1600.1	0	0	0.68602	0.655631	1.85527	1.4325	1.42267	1.99557	1.30976	1.11782
MSTRG.16000.1	0	1.0525	1.44856	1.4094	1.65907	1.0883	1.02416	1.04229	2.48426	1.65838
MSTRG.16001.1	0	0	0	2.29756	6.15304	0	0	2.43338	0	0.798755
MSTRG.16002.1	0.0128413	0.0140909	0.787234	0.000113564	1.67268	1.1068	0.667571	0.757352	1.2522	1.07814
MSTRG.16002.3	0.123504	0.337104	0.0145087	1.44295	0.488226	0.850645	0.41145	0.674083	0.631761	1.21336
MSTRG.16003.1	1.29158	3.07764	2.37456	4.12384	2.08036	3.66605	0.948551	2.84789	1.65753	3.56798
MSTRG.16005.1	8.78335e-05	8.52048e-05	3.43991	1.87671	1.49858	0.622755	1.59348	3.30229	0.729353	1.80756
MSTRG.16006.1	0.171141	0.367704	1.23832e-05	0.688355	0.982385	0.946892	0.000174885	0.000293603	0.591054	1.03918
MSTRG.1601.1	0	0	0.50838	0.372707	0.422129	0.123506	0.813482	0.12163	1.49474	1.12713
MSTRG.16023.2	0.739558	0.993419	1.65011	2.86096	2.44954	1.7299	3.12036	2.55173	2.99303	3.56809
MSTRG.16025.1	1.63972	1.79217	2.12954	2.04776	3.57015	1.55014	4.45063	2.54757	2.87924	1.39873
MSTRG.16026.1	0	0	0	0	0	0	0	0	0	5.00191
MSTRG.16033.2	1.1761	0.373749	0.371197	1.08248	1.11975	0.65519	1.57727	1.38909	1.69477	1.95497
MSTRG.16034.1	3.13009	6.03155	1.73515	3.24596	4.07466	3.61082	3.58014	3.8769	4.12072	3.39344
MSTRG.16034.2	5.07188	6.94492e-19	4.6704	2.05608	4.78814	3.25784	4.56538	3.05676	5.05288	3.64534
MSTRG.1604.1	0	1.60255	0.734946	2.62156	2.02368	0.368193	1.55858	2.35062	1.4746	2.27455
MSTRG.16043.1	0	0.738523	0	0	0.329944	0.300858	2.70196	0.92849	0	0.600276
MSTRG.16044.1	0.0601883	0	0.390981	0.354189	0.287782	0.248005	0.806106	0.676391	1.47797	0.648213
MSTRG.16049.1	0	0	0	14.3926	0	2.10422	0	1.75461	0	0
MSTRG.16050.1	0	0	0	0	0	0	0	6.42301e-07	0.835398	1.1717
MSTRG.16050.2	0	0	0	0	0	0	0	2.75205	3.03505	0
MSTRG.16061.1	6.46186e-08	0.220435	1.25455	1.91242	1.45395	1.71576	1.67544	3.56261	0.776166	1.48433
MSTRG.16065.1	0.137891	0.447267	0.297567	0.667248	1.47575	1.77319	3.50648	1.86628	2.06294	0.872201
MSTRG.16070.2	0	0.462211	4.17404e-102	9.72922e-89	0.54815	0.286752	1.26018	0.682533	1.26102	1.09436
MSTRG.16070.3	0	1.14176e-28	1.64865e-53	0.470106	5.09719e-24	7.8294e-66	1.37751e-33	0.879259	1.04257	1.54405
MSTRG.16070.4	0	1.82398	1.78998	1.08205e-31	1.04725	0.706437	6.92783e-19	1.08631	3.30467	0.580405
MSTRG.16071.1	1.66565	1.32224	0.639833	1.00416	1.94514	1.01122	0.914034	0.696178	0.83868	0.400235
MSTRG.16073.1	0.530103	0.569437	0.876487	0.855086	0.789329	1.25106	0.186539	0.791161	0.865606	0.466212
MSTRG.16074.1	2.45953	0	0	0	0	1.32377	0	0	0	2.08261
MSTRG.16075.1	4.22205	2.36396	1.00296	1.8932	1.41648	0	1.02364	0.979799	1.23911	2.00357
MSTRG.16076.1	0	0	0	3.72611	0.989865	1.23264	0	1.02851	0	1.57738
MSTRG.16077.1	0	0.681683	1.20628	0.578334	1.15529	2.59846	1.88405	2.30079	1.45252	1.1955
MSTRG.1608.1	1.06357	0.489075	2.41469	1.4738	1.91666	1.70444	6.43189	4.2031	3.14159	3.53916
MSTRG.16088.1	0	0	0.239552	0	0.388727	0.340889	0.255642	0.633352	1.17729	0.864681
MSTRG.16089.1	0	0	0	0.965225	1.02411	0.963132	1.04355	0.975808	0	0.351559
MSTRG.1609.1	3.97407	2.63698	4.58904	11.6588	10.8591	7.66261	15.0087	12.4453	14.7624	12.0389
MSTRG.1610.1	0	0	0.918519	0.798673	0.842357	0.257855	1.85265	0.538825	0.814167	0.389042
MSTRG.1610.2	0	0	0.408868	2.77315	6.21382e-05	0	0	0.976381	0.153521	0.265092
MSTRG.16105.1	0	2.9403	0	0	0	1.07963	0	0	0	2.77681
MSTRG.16120.1	0	0	0	0	0	5.00414	2.39206	0	0	0
MSTRG.16128.3	1.22458	1.438	1.9946	1.37909	2.59469	2.54358	3.13086	3.25366	4.50743	3.66051
MSTRG.16130.1	0	0	0	0.697587	0.330115	0.397353	0	1.04251	0.302793	1.48303
MSTRG.16137.1	0	0	0	0	0	2.26153	0	0	1.64328	7.50178
MSTRG.16144.1	0.0464913	0.248204	0.510666	1.50248	0.905521	0.767169	1.54162	1.29117	1.73962	1.11939
MSTRG.16145.1	1.07544	1.42995	1.37688	1.53978	0.579355	0.418466	0.972201	0.90264	0.858196	1.26685
MSTRG.16145.2	0.990343	1.49528	2.01132	0.534211	0.413982	0.651726	2.14684	1.74915	1.62656	1.25003
MSTRG.16149.1	0	0.935254	0	1.10652	1.40567	0.947595	2.41113	1.3649	0.328634	1.13826
MSTRG.16159.1	14.5952	13.0682	2.99974	11.1092	13.7604	7.20595	7.46982	10.5461	12.704	12.8381
MSTRG.16162.1	0	0	0	0	0	0	0	0	3.34388	0.711963
MSTRG.16164.1	0.315823	0.901694	2.93474	6.35795	7.59899	3.94572	13.6565	7.68642	11.9841	10.9762
MSTRG.16165.1	0	0	0	0	3.93473	7.12106	0	4.04951	4.25982	1.75877
MSTRG.1617.1	1.21276	0	0.58891	0	1.35766	0	0.61364	0.569728	0	1.40466
MSTRG.16171.1	0.543595	0.59405	1.05912	1.01856	0.949549	0.566991	1.10691	0.251023	1.03634	1.29876
MSTRG.16175.1	9.44502	7.88104	7.62316	2.10806	3.91623	4.61407	3.55706	2.91584	1.34682	3.68706
MSTRG.16175.2	9.45785e-05	1.88495	1.33293	2.95482	0.715719	1.08087	0.424017	0.925118	1.50223	1.35726
MSTRG.16175.4	6.16801	4.41577	2.96834	3.72686	2.96582	3.05	2.43292	3.4397	1.0372	1.98322
MSTRG.1618.1	0	0.351946	0.545241	0.426694	0.554891	0.317567	1.04793	0.627178	0.656312	1.00041
MSTRG.16184.1	0.299491	0.319584	0.698267	0.815694	1.02698	0.87983	0.570283	0.958397	1.42098	1.2547
MSTRG.16187.1	0.426576	0.152498	0.282612	0.690235	1.20866	0.7607	0.602521	0.883016	1.06967	1.4533
MSTRG.16188.1	0	0	0	0.488974	0.227553	0.271525	0	0	1.54827	0
MSTRG.16189.1	1.52525	1.1016	2.28476	2.15301	2.84058	1.82556	2.78361	2.34272	3.2044	2.56626
MSTRG.1619.1	0	0.604181	1.07625	1.03468	0.723893	0.247707	0.562163	1.54494	4.08644	1.06677
MSTRG.16193.1	12.289	15.3903	0	8.2954	6.71982	9.3062	0	4.52455	9.65265	10.0279
MSTRG.16201.2	0.502516	0.548097	0.981069	0.472488	0.500831	0.26185	1.02736	0.473459	0.471118	1.68984
MSTRG.16203.1	1.54629	0	1.43525	1.3321	1.99339	0	0	0	0	1.41706
MSTRG.16205.1	0	1.15627	0	5.5721	0	0	1.00447	0.457633	0	0.352333
MSTRG.16208.1	0	0	1.25954	0.603226	0.566596	0	1.96459	1.5094	0	0
MSTRG.1621.1	1.32107	2.99708	0	1.15904	0.615094	0	1.25029	0.571022	2.40839	0.419215
MSTRG.16210.1	1.5435	2.09287	1.5154	1.83279	2.88007	1.32175	3.19184	2.36057	3.62361	3.33812
MSTRG.16216.2	0.525847	1.06268	0.564595	0.220746	0.528287	0.934231	0.724494	0.786047	0.644424	0.620662
MSTRG.16219.1	2.98835	3.97239	2.1717	5.03039	7.5413	5.58057	6.75021	4.84062	8.33635	5.9132
MSTRG.16228.1	0.324734	0.463631	0.431014	0.316238	0.500693	0.279733	0.460248	0.775193	1.43058	0.544157
MSTRG.16235.1	0	0	0	0	0	0	0	0	0	3.87801
MSTRG.16238.1	0	1.38108	1.83155	1.7557	1.37226	0	1.27092	0.576901	0.248586	0.643306
MSTRG.16241.1	1.10137	1.61841	4.59929	4.23869	3.72763	4.69799	6.21177	5.7315	10.197	3.8649
MSTRG.16241.2	0.216531	1.18709	1.77659	2.7929	1.00133	1.29767	2.34641	1.88579	1.06708	2.15526
MSTRG.16251.1	1.57063	1.80357	4.36848	3.67172	6.34995	1.39692	1.4535	4.09858	2.433	3.15467
MSTRG.16255.1	1.82559	1.26108	3.27454	2.31406	2.41518	1.95669	3.76205	3.16193	3.14366	3.88562
MSTRG.16257.1	0.18824	0.472524	0.392563	1.25022	1.28258	0.796425	1.42576	1.55789	1.80447	2.05083
MSTRG.16262.1	0	1.51433	2.49227	3.49756	4.84509	3.4342	7.03559	4.25054	7.49444	4.67367
MSTRG.16264.1	0	0	1.59059	1.51355	1.43939	0.434241	0.820136	1.1461	0.927841	1.57625
MSTRG.16267.1	39.349	34.1485	26.0779	20.5901	15.7774	17.7813	17.2586	21.1076	14.9205	18.3523
MSTRG.1627.1	1.73444	4.01564	3.19132	1.47196	0	4.16338	3.16408	3.62447	3.89289	2.25573
MSTRG.16272.2	7.56312	5.6352	4.20664	6.54648	4.51443	3.32339	3.84185	5.17686	2.4434	3.07982
MSTRG.16287.1	0.436418	0.464426	1.29585	1.60092	1.43787	1.64722	2.21381	2.58129	1.14246	2.62823
MSTRG.1629.1	1.00667	1.56927	1.56418	3.27863	1.23132	0.800419	0.697411	0.999419	0.422795	0.696989
MSTRG.16290.1	0	0	0	0	0.190688	0.174965	0.413009	0.309661	0.639487	1.30401
MSTRG.16291.1	0	0	0	0	0	0	0	0.947275	0.938249	2.16649
MSTRG.16292.1	0	0.0247504	0.0695962	0.0683203	0.374847	0.149145	0.0995217	0.490613	0.524545	1.18473
MSTRG.16298.1	3.39093	4.94591	1.09996	0.528486	0	0.589741	0	0.265791	0	0
MSTRG.16299.1	0	0	0	0	1.07078	0	1.62782	0	0.295412	0.524818
MSTRG.163.1	0	0	0	0	0.457901	1.70672	0	0	0	0.286646
MSTRG.16304.1	0	0	0	0	1.90693	0	0	0	0.626661	0.966835
MSTRG.16305.1	0	0	0	0.509281	1.04719	0	0.553457	0.255799	0.609864	0.737244
MSTRG.16310.1	5.45057	0	1.03411	0	0	0	1.0538	0	0.894553	0.354929
MSTRG.1632.1	1.10219	0.949105	1.74567	0.850039	1.27182	1.70557	1.39016	1.04696	4.89049	2.12433
MSTRG.16322.1	0	0	0	0	0	0.770041	1.58204	0.724894	2.10147	1.65435
MSTRG.16323.1	0	0	0	0	0	1.07383	0	0	0.236064	0.203258
MSTRG.16327.1	0	0	0	0	1.18484	0	0	0	0	0
MSTRG.16336.1	0	1.43774	0	0	0	1.23914	0	2.34531	0	1.27372
MSTRG.16338.1	0.797896	1.16999	0.598357	0.783287	1.37934	1.0474	1.49763	1.18796	1.18316	1.30645
MSTRG.16346.1	2.09448	0.571682	0.510604	1.47427	2.67473	0.780677	0	0.488755	0.382433	0.532493
MSTRG.16363.1	0.0591796	0.126451	0.531508	0.347332	0.617482	0.328211	1.20119	0.708582	1.24955	0.766361
MSTRG.16386.1	0	1.23304	0.229107	1.45644	0.525296	1.04508	0.244561	0.992394	0.478386	0.961818
MSTRG.16387.1	0	0.561992	0.116989	1.4639	0.756666	1.06752	0.125431	1.12341	1.01225	1.30499
MSTRG.16391.1	1.64646	0.296116	0	0	0	0	0	0	0	0
MSTRG.16393.1	0	0	1.28732	0	0	2.56839	0	0.591969	0.481825	0.47054
MSTRG.1640.1	40.7196	44.9276	57.4992	60.326	72.4593	57.2772	69.3913	58.0619	130.839	64.8217
MSTRG.16400.1	0	0	0	1.49437	1.54935	0	0	0.735907	0.606819	1.6825
MSTRG.16401.1	0	0	0	0	0	0	0	0	0	2.48617
MSTRG.16412.1	3.75732	2.11437	2.12975	2.42382	1.53266	2.55803	2.45491	2.81286	0.939498	1.44638
MSTRG.1642.1	0	0	0	2.01588	1.07121	1.10519	2.15293	2.11608	0	0
MSTRG.16422.1	0	0	0	0	0.718768	0	0	0.703827	0	1.72477
MSTRG.1643.1	0	0.267394	0.496374	0.485266	1.52798	0.939211	0	0.953865	1.12862	0.791728
MSTRG.16433.1	2.11555	5.91813	1.25705	0.612326	0.108119	0.518756	0	0.503076	0.235438	0
MSTRG.16434.1	0	0	0	0	0	2.43661	4.36444	0	0	0
MSTRG.16436.1	1.88968	1.16499	4.26508	3.10914	2.73165	3.45192	2.54106	3.45167	3.65677	2.61316
MSTRG.16437.1	0	0	0	0	0.548421	0	1.20806	0.551504	0	0
MSTRG.16439.1	7.21713	8.00158	6.00906	5.33252	7.41141	6.29576	4.5183	5.92512	5.41679	6.61143
MSTRG.16442.1	0	0.636759	0.565559	1.08623	0.253842	0.781979	1.77001	1.35565	1.56787	1.37452
MSTRG.16448.1	1.31537	2.86073	1.71743	2.90207	0.822994	1.243	0.902027	0.615614	0.160801	0.877747
MSTRG.16458.1	2.38843	3.49296	1.26773	0.385524	0.881397	0.878831	0.413328	0.30515	0.315024	0.425224
MSTRG.16466.1	1.14086	6.53528	0.517682	0.101519	0.710589	0.720111	0	0.892561	0.823142	4.38084
MSTRG.16472.1	6.16437	7.82712	23.8927	32.8848	35.4398	25.3676	46.4242	34.1125	44.9281	36.6539
MSTRG.16473.1	0	0	0	0	0	0	0	0.952865	0	2.24076
MSTRG.16474.1	0	0	0	0	1.22659	0.237656	0.468762	1.4986	0	0.725605
MSTRG.16480.1	0.170947	0	1.69638	0.827671	0.701056	0.265406	2.16683	0.895174	0.516166	1.25602
MSTRG.16484.1	0.565543	2.42605	0.421532	0.411823	0.383419	0.546605	0.748942	0.404779	1.12022	1.21389
MSTRG.16487.1	0.304575	0	0.300237	1.16569	1.51046	0.862999	1.90474	0.72064	1.93081	2.93905
MSTRG.16489.1	2.39877	3.90561	5.09918	4.17246	5.49086	3.33438	4.95368	3.57512	1.33842	5.01229
MSTRG.1649.1	0	0	0	0	0	1.10519	0	3.37302	0	0
MSTRG.16491.1	0	0	0	0	1.39113	0.347439	0.772855	1.77991	0.279938	1.98135
MSTRG.16493.1	0	0	0	0.688219	0.313789	0.214063	1.00027	0.226165	1.16253	0.639364
MSTRG.16495.1	0	1.76465	0.398508	0.385273	0.559809	0.57586	0.419264	0.189908	0.62218	0.951125
MSTRG.165.14	3.56101e-94	0.114612	1.15094	0.461347	1.44468	0.124997	0.470442	0.280303	0.251082	0.255241
MSTRG.1650.1	0	0	0.873743	0	1.8134	0.664757	0.917466	1.2607	3.64641	0.585559
MSTRG.16501.5	1.06902	6.73192e-06	3.91805e-05	0.00118028	6.97153e-05	1.50378	0.316644	1.27389	0.385378	0.149665
MSTRG.16502.1	1.28945	0.197944	0.730699	0.178161	0.0943691	0.948031	0.777262	0.438824	0.136858	0.441083
MSTRG.16506.1	0.164465	0	0.163258	0.15935	1.19317	0.539632	0	0.626583	0.0626047	0.786432
MSTRG.16511.1	0	1.96974	0.849415	1.61308	0	0	0	1.58992	3.26733	1.06299
MSTRG.16527.1	0.000920315	3.45392e-10	0.368927	0.814572	0.153229	0.795455	0.377961	0.966563	1.00109	0.883104
MSTRG.16527.2	0.583432	0.630765	0.452501	0.919394	0.32223	0.724748	1.82828	0.795067	2.63878	1.89307
MSTRG.16527.3	0.676182	0.890223	0.000301262	0.803003	0.150951	0.646143	1.0157	0.462101	0.298471	0.0570271
MSTRG.16527.4	2.82738e-14	0.0445943	0.751036	0.209153	2.59365	0.39327	0.618802	0.75603	1.03304	0.797402
MSTRG.1653.1	0	0	0	0	0	5.32662	0	0	1.30401	0
MSTRG.16533.1	0	0	0.60314	0	1.15529	1.25238	0	6.39341	1.88474	2.89367
MSTRG.16540.1	3.29069	1.34018	0	0.779734	0.593197	0.398465	0.848484	0.580674	0.15106	0.423527
MSTRG.16545.1	0	1.19527	0	0.955823	0	0	1.0335	0.989976	1.74742	0.9642
MSTRG.16546.1	0	0	0	0.855785	0	0.422664	0.926393	1.72372	0	1.17355
MSTRG.16547.1	1.28699	0	1.2094	0	0.555349	0.681499	0	0.593631	3.61314	2.16918
MSTRG.16551.1	21.606	29.9717	18.6068	16.4985	7.89401	12.6336	6.25494	10.7255	2.60342	5.7098
MSTRG.16552.1	4.71728	4.08188	2.5695	1.47602	1.73025	2.24362	0.805194	1.88743	1.20511	1.56859
MSTRG.16553.1	0	0	1.15354	1.08234	3.30883	0.545906	1.16859	1.06655	0.863571	0.392553
MSTRG.16555.1	13.6644	16.9483	16.4215	15.0028	14.3837	15.0601	17.249	16.6624	15.2333	15.16
MSTRG.16561.1	1.45603	1.66257	6.78633	7.58101	5.77149	10.2039	16.3358	13.0943	13.8397	13.8869
MSTRG.16571.2	0	1.21009	1.52698	0.369318	0.53619	1.58963	0.401971	0.182045	0	0.131605
MSTRG.16572.1	0	0	3.61117	0.992793	1.45077	1.06491	2.15813	0.249111	1.80947	1.1528
MSTRG.16573.1	0	0	0	2.527	2.50634	0	0	0	2.2487	0
MSTRG.16574.1	0	0.366532	1.3548	0.826277	0.712423	1.11316	1.80265	1.38104	1.54229	1.82812
MSTRG.16577.1	0.758056	1.89561	3.26704	4.79059	2.53109	3.50969	2.81514	2.89626	0.805496	1.79726
MSTRG.16579.1	2.85124	1.37778	3.75695	0.627909	1.07669	0.899001	0.391716	0.307491	0.899422	0.530091
MSTRG.1658.1	3.58546	2.7688	1.42516	1.67067	1.08347	1.1539	1.21529	0.752469	0.867886	1.36125
MSTRG.16580.1	0.549585	0.600766	3.21144	0.514624	0	0.246347	0	0.258577	0.400877	0.186355
MSTRG.16587.1	0	0	0	0	0	0	0	2.47037	0	0
MSTRG.16588.1	0	0.518546	0.237974	0.694717	0.316805	0.914471	0	1.25575	1.17364	0.970695
MSTRG.16589.1	0	0	0	0	0.993589	1.03165	4.06177	0	2.13458	2.20535
MSTRG.16590.1	0	0	0	0.525654	0.523962	0.796948	1.14229	0.264316	2.50243	0.333756
MSTRG.16591.1	0	0	0	2.41963	0	0.396539	0	0	0	0.265747
MSTRG.166.5	4.71572e-48	0.735804	6.48276e-166	3.90464e-59	0.466149	0.79313	1.64326	0.24933	0.891843	0.572831
MSTRG.166.6	6.30559e-90	3.02749e-49	0	1.65028	1.5569e-21	1.06633e-65	1.49424e-43	0.727499	8.42191e-07	0.114402
MSTRG.166.7	0.801604	0.43916	0.499593	0.0141044	1.05076	0.967738	5.24529e-49	0.00344991	1.85246	1.30715
MSTRG.16601.2	5.45549	3.49288	1.50246	3.52486	4.16465	3.36316	3.06077	4.44504	2.89561	4.13599
MSTRG.16608.1	0.299768	1.92966	1.48893	0.581654	4.01302	2.79556	0.951933	2.0011	2.59363	3.35989
MSTRG.16611.1	0.936597	2.29505	2.68017	3.31527	6.17523	5.39248	9.01378	7.78106	4.73362	6.60292
MSTRG.16611.2	3.42089e-07	1.71062e-05	0.921695	3.79665	1.16012	2.53473	0.90092	1.93448	1.00042	1.02624
MSTRG.16612.1	0.618912	0.665751	0.613088	0.796547	1.29794	1.63859	0.651433	1.17717	1.55008	0.95083
MSTRG.16618.1	1.85356	0.659109	4.61447	3.21728	3.70436	3.27384	3.79059	2.65398	4.71885	5.40183
MSTRG.16621.1	0	0	0	0	0	0	0	3.31182	0	0
MSTRG.16630.1	4.93367	6.49459	3.8263	5.15763	6.08677	6.39958	4.63527	5.44019	3.10886	3.67362
MSTRG.16631.1	0.390401	0.557952	0.776407	1.1383	2.67653	2.92136	3.03653	2.30051	1.27057	1.6811
MSTRG.16636.2	0.853783	0	2.42213	0	0	0.2276	0.518652	0.239107	0	0.150509
MSTRG.16638.1	0	0	0	0	1.15817	0.832421	1.69203	0.784367	0	3.03981
MSTRG.16643.1	0.822902	1.00747	0.233939	0.22877	1.27942	1.41322	0.998749	0.787274	2.04048	0.799061
MSTRG.1665.1	1.44443	1.71116	1.00022	0.873956	1.07739	0.972851	1.07424	0.906944	0.987898	0.86489
MSTRG.16653.1	0.321099	0.244887	1.55742	1.16805	1.46163	0.944807	2.45348	1.45171	3.74224	2.65953
MSTRG.1666.1	0	0.59405	1.05912	1.52784	0.474774	0.810662	3.8742	1.77627	1.81236	1.01826
MSTRG.16661.2	7.30304	14.4139	5.56269	4.88786	2.57827	4.47628	1.42101	1.13691	1.02449	1.15453
MSTRG.16662.2	2.01715	1.94926	0.659322	0.000321208	0.445381	0.534582	2.08073e-07	0.21451	2.61744e-09	0.137794
MSTRG.16668.1	0.440752	0.845466	1.72664	2.09784	3.09515	2.28335	3.57006	2.32059	6.61342	4.40297
MSTRG.16669.2	0.35344	1.14361	1.70382	0.818339	1.21867	0.739225	1.88229	1.4716	2.22128	2.75093
MSTRG.16669.3	0.247328	1.67806e-05	9.47252e-05	1.1174	1.43549	0.693644	1.96256	1.05453	0.519574	0.743623
MSTRG.1667.3	0.000361333	0.20077	9.58385e-05	5.30436e-08	0.447745	0.955041	3.11838e-05	1.01734	0.242687	0.427569
MSTRG.1667.4	0.211126	0.324213	2.09602	2.11352	1.25278	1.9606	3.04328	1.65548	5.84179	1.67718
MSTRG.16670.1	36.1767	36.4487	43.2734	62.0843	49.9486	45.6643	52.2486	52.6984	67.7021	55.9041
MSTRG.16670.2	0.660551	0.569944	2.06255	1.59998e-07	0.278859	4.14086e-09	2.47693e-11	0.531844	4.90484	1.50953e-06
MSTRG.16671.1	2.66562e-05	4.19758e-05	2.45074	1.68501	1.20112e-05	1.55108e-05	2.4156e-05	0.891621	7.86106e-05	2.0544
MSTRG.16671.2	51.914	72.1497	93.9993	98.6347	92.9545	73.2806	89.4955	80.5526	98.4545	82.3358
MSTRG.16688.1	0	0	0.438792	0.423531	0.196076	0	0	1.05203	0	0.441879
MSTRG.16691.1	1.72537	0.928377	1.92188	1.45603	0.204863	0.596025	0.907165	0.717005	0.164853	0.597913
MSTRG.16692.1	0.447803	1.92835	0.2216	0.431564	0	0.100553	0	0	0.168635	0.0756323
MSTRG.16695.1	1.30515	3.46741	3.16457	3.85075	2.11419	1.45821	4.83442	4.34502	0.488449	2.57512
MSTRG.16695.2	2.74564	1.31902	2.31363	3.85165	0.339399	3.86928	0.533563	0.00593332	4.61416	1.96768
MSTRG.16696.1	3.70695	5.25758	2.03667	2.73397	2.39739	3.55401	1.3716	3.11764	0.910002	2.70342
MSTRG.1670.1	0.250939	0	0.248025	0.723762	0.696008	0.372839	1.5777	0.237941	0.759568	1.05849
MSTRG.16708.1	3.98976e-87	6.55766e-159	4.96044e-139	5.07038e-194	1.59416e-60	0.490706	0.000485707	0.990509	1.26819	0.642631
MSTRG.16709.1	0	0	0	0	0	0	0	0	0	3.40477
MSTRG.16710.1	3.21923	1.25286	1.94234	2.56749	1.29826	1.43981	2.19659	2.66344	2.02663	2.83038
MSTRG.16715.1	0	0.45715	0.106263	0.415841	0.314114	0.151103	1.02131	0.509501	0.320386	0.627211
MSTRG.16720.2	1.97508	9.25632	19.6337	37.2565	25.1162	24.9045	16.6252	31.3937	8.98432	18.4185
MSTRG.16721.1	0.383277	0	0.949872	0.37045	1.122	1.02571	0.202005	0.455454	1.15962	0.830178
MSTRG.16724.1	4.93691	1.20796	2.22093	3.67638	3.04918	4.08494	3.065	4.79449	5.23084	3.47919
MSTRG.16726.1	0.574439	0.702128	0.572585	0.961269	0.576606	1.12087	0.962089	0.78706	0.462414	0.617811
MSTRG.16727.1	0.434637	0.945097	0	0.822213	0.217857	0.616076	0	1.21833	1.45662	0.281399
MSTRG.16728.1	0	0	0	0	1.53413	0	0	0.368623	0.284191	0.265769
MSTRG.16729.1	0	0	0	0	1.08995	2.52319	0	0	0	0.88942
MSTRG.16734.1	17.7146	15.7062	17.0036	19.1353	18.9153	17.5459	20.3391	18.9288	24.4537	21.7724
MSTRG.16750.1	0	2.3126	0	1.64461	1.68512	1.05908	0	0	4.43628	1.2202
MSTRG.16766.1	1.08048	0.831027	0.741107	1.44485	1.11339	0.553642	0.323082	0.5473	0.292305	0.281852
MSTRG.16767.1	36.8253	22.6594	24.8852	35.6051	17.8984	26.814	31.947	38.3946	32.3083	23.1608
MSTRG.16767.2	6.16782	0	0	3.53396e-22	1.80779	1.0158	0	0.83769	5.51152	2.13295
MSTRG.1677.1	0.520886	3.41174	3.04804	4.40076	2.79385	1.31962	3.18905	2.91767	1.59052	1.55891
MSTRG.16783.1	3.87271	0	1.76465	3.23501	5.98135	5.50641	5.2065	4.94099	8.91697	2.39228
MSTRG.16786.1	85.6654	54.1146	33.325	31.4985	29.7362	32.7177	25.6599	32.0972	25.3322	29.7474
MSTRG.1679.1	0	0	0	0	3.04847	0	0	0	0.800854	0.681441
MSTRG.16799.1	14.4761	12.7984	23.4622	18.7977	16.3456	18.9079	19.5173	19.3009	21.8964	24.158
MSTRG.168.1	0.272909	3.77849e-258	1.2077	0	1.30576	0.81537	0.606551	1.024	0.858281	0.392655
MSTRG.16802.1	1.96386	0.527075	1.29969	1.11004	1.1511	0.717499	0.518979	1.40524	0.801196	1.7714
MSTRG.1681.1	1.85149	3.52742	2.2636	3.93056	1.67728	4.80079	2.84995	3.46543	4.98506	4.04868
MSTRG.16818.1	0.483048	2.10552	3.77586	3.18471	4.79516	3.96232	4.45247	4.97123	6.65953	4.88385
MSTRG.16832.1	0	0	3.4188e-06	0.171269	0.503534	0.263207	1.64671	1.34515	2.53185	3.81969
MSTRG.16832.2	0	0	0.160307	0.221353	0.199188	0.164442	0.000179063	0.580783	1.84752	1.3156
MSTRG.1684.1	0	0	0.396923	0	0.203358	0.420868	0.417631	1.33596	0.4543	0.816143
MSTRG.16844.4	1.69159	0.567507	0.450195	3.41516	0.580604	0.360118	2.51795	2.13811	0.710422	2.15726
MSTRG.16849.1	4.63953	0	4.49342	4.30193	7.95405	2.52391	4.00252	5.20525	5.30328	6.79632
MSTRG.1686.1	0	5.25539	0	3.06942	3.34126	0	0	1.50304	8.91101	4.13659
MSTRG.1687.2	0.716063	0.1536	1.13256	0.675928	1.02651	0.313261	2.12358	0.211944	0.377633	0.370364
MSTRG.16870.1	0	0	5.29394	0	0.826768	0	0	0	0	0
MSTRG.16871.1	0.26868	1.87232	0.534223	0.261033	0.23621	0.259668	0.142425	0.191749	0.0510176	0.3114
MSTRG.16872.1	1.15311	1.29738	0	0	0.498652	0.608941	0	0	0.883875	1.09007
MSTRG.16875.1	4.35945	6.7812	1.26499	1.13119	1.64983	1.63567	0.783665	0.931782	0.649484	0.841771
MSTRG.16876.1	0	0	0	1.13657	0.567384	0.637221	0.617172	0.853253	0.924888	0.80544
MSTRG.16879.9	0.648578	1.4742	6.43787e-11	0.65007	0.183994	0.291379	4.39339e-09	3.07629e-07	7.72921e-19	0.177936
MSTRG.16885.1	0.489561	1.31889	0.484025	0.941853	2.17938	0.693411	0	0.812671	1.66244	0.66184
MSTRG.16887.1	2.72088	4.89482	9.96711	8.69052	9.97078	8.36169	16.4269	11.3428	17.8501	13.0448
MSTRG.1689.1	5.53839	6.47913	5.94433	5.10128	4.62184	7.49615	6.51314	3.60727	6.24229	5.00637
MSTRG.16893.1	5.05606	9.70144	8.67881	9.34128	9.57398	11.3302	9.90215	10.2561	9.64189	12.4571
MSTRG.1690.1	1.6782	4.28805	17.66	15.5867	13.9004	11.1348	11.6982	7.47788	11.1734	6.65939
MSTRG.16905.1	0.863624	3.83293	0	0	0	0.453371	0	0	0	0
MSTRG.16906.1	1.08126e-10	9.87887e-20	26.4611	4.57539	2.36662	5.06759	16.7148	10.6277	23.7028	8.32699
MSTRG.16906.10	4.85746e-44	6.08974e-50	1.2489e-183	3.49214e-102	0.0617785	3.46425e-38	26.4387	1.28764e-90	5.96656e-70	5.59831
MSTRG.16906.11	1.6943	4.23169e-26	4.38967e-65	1.02697e-101	4.02149	0.159151	1.05129	4.708	1.61556e-32	1.51497
MSTRG.16906.13	1.16198e-180	0	0	0	3.02121e-144	0.169634	0	0.156276	4.68906	5.5395
MSTRG.16906.14	8.68532e-59	1.6988e-109	7.56329e-180	1.28142	1.97314e-43	5.82846e-80	2.95673e-139	3.66871e-104	1.70767	4.97404e-65
MSTRG.16906.15	0.422527	0.00141289	243.951	142.854	128.489	106.91	296.123	214.892	519.619	114.75
MSTRG.16906.16	1.43041e-51	3.61783e-76	8.95244e-149	5.17919e-89	5.54817e-37	1.16654e-61	3.65435e-109	2.64487e-86	1.24995e-64	1.66016
MSTRG.16906.17	2.96618e-25	8.24531e-29	2.77295e-63	3.70804e-38	3.0148e-16	9.15604e-28	9.7415e-46	4.14846e-36	3.3227e-22	1.30863
MSTRG.16906.18	1.21306e-58	1.48593e-87	4.78507e-59	0.680917	0.729135	0.215635	7.27999e-123	0.33909	8.63207	9.33293e-32
MSTRG.16906.2	4.80671	3.47762	49.6012	6.92192	17.0408	7.1794	25.8318	5.21849	49.9528	24.3545
MSTRG.16906.3	1.24276e-12	7.18303e-37	1.23397	3.26702	4.40116e-15	9.921e-14	2.55394e-48	1.34119	3.21566	2.6868e-13
MSTRG.16906.4	2.81285	0.000654131	89.1167	40.5478	40.4426	20.2139	100.86	36.8107	126.881	52.0221
MSTRG.16906.5	5.20094	6.08054	171.506	83.2159	64.4359	67.9303	202.151	242.981	231.965	133.189
MSTRG.16906.6	2.03402e-39	5.20912e-85	1.18945	0.152894	1.95435e-34	0.0238813	5.3134e-116	8.29765e-64	0.215678	1.15818
MSTRG.16906.7	0.00760113	1.20709e-14	114.049	0.011158	0.0107624	0.00180348	0.0123144	1.97353e-05	0.0248715	0.00208991
MSTRG.16906.8	1.50527e-05	2.51472	8.21982	4.50831e-18	1.52307	1.2127	0.032393	0.103945	9.69422	2.8587
MSTRG.16906.9	0.000470324	0.00829384	0.597575	1.10587	0.00101681	3.51594	8.85245	13.9527	8.58119	3.32322
MSTRG.1691.1	2.37094	3.66596	5.99967	7.75431	6.16331	5.12707	5.27758	4.30712	3.41604	1.99532
MSTRG.16914.1	1.78452e-07	0.219302	0.615217	0.250576	0.659788	0.464365	2.13037	0.865454	4.35121	1.83798
MSTRG.16915.1	0	0	0.363669	0.704173	0.162083	0.384674	0.766576	0.349966	1.13156	0.496852
MSTRG.16925.1	0	1.02732	0.922167	0.889295	1.79683	1.3713	1.93425	1.77252	1.77301	1.60939
MSTRG.16933.1	40.3839	51.9907	17.5466	13.6959	15.9336	17.4201	5.63198	17.4677	7.98767	10.3042
MSTRG.16938.1	0	0	4.78698	1.47196	0	0	0	0	0	0
MSTRG.16940.1	0.117281	0.125637	0.58348	3.30945	1.78158	1.13331	1.12098	2.01662	0.750813	1.24865
MSTRG.16951.1	0	0	0	0	1.83052	0	0	0	0	1.10254
MSTRG.16956.1	0	0.21217	0	0	0	0.368069	2.49457	0.187937	0.21976	0.703212
MSTRG.16957.1	1.54174e-72	3.04673e-12	1.44042e-24	1.42847e-24	5.59564	4.33757	7.04501	3.15451	1.04122	2.41928
MSTRG.16958.1	6.72504	13.4103	7.43213	7.37572	23.4565	20.0723	27.9648	19.0359	24.9852	20.9284
MSTRG.16958.2	4.55063e-05	12.7585	1.94191	1.34542	17.0803	8.04186	12.8427	3.67734	19.2729	14.0604
MSTRG.16960.1	0	1.65894	1.10093e-19	2.90073e-12	4.30408	4.25594	1.0369	2.55966	1.32013	2.86423
MSTRG.16962.1	0	0	0.911432	0	0.457901	0.853359	2.80339	0.425443	0.341216	1.43323
MSTRG.16963.1	3.62703	0	1.14037	6.42318	1.56706	0.539357	0	2.76279	3.41055	1.92119
MSTRG.16965.1	0.0693601	0.33449	0.746673	1.36217	0.689793	0.616512	1.60458	1.00085	1.02081	1.02965
MSTRG.16967.1	0	3.79941	0	0	0	0.503133	0	0	0	0
MSTRG.1697.1	0	2.44989	2.64437	2.5522	2.64581	2.31164	0.462693	2.73958	5.54549	3.78993
MSTRG.16971.1	1.79294	1.53684	2.44755	3.37764	2.4892	2.84151	2.0716	4.58282	4.78392	4.93212
MSTRG.16972.1	0	0	0	0	0	0	0	16.568	8.32046	0
MSTRG.16977.1	2.92455	2.24732	2.89665	3.02388	3.98638	4.79088	4.83595	3.47626	7.15647	4.24758
MSTRG.1698.1	0.936599	0	0.895094	0.848385	0.856405	1.47725	0.91846	1.70838	1.76409	1.82935
MSTRG.16985.1	0.621495	0.681683	1.80942	1.15667	1.11978	0.88155	0.628016	0.291845	1.14875	1.62277
MSTRG.16986.1	0	0.370429	0.673374	0	0.472732	0.177718	0	0.160853	1.14592	0.641346
MSTRG.16996.1	0	0	2.47881	0	0	0.700032	3.75086	1.71306	0.463905	0.419215
MSTRG.16997.1	0	0	0	1.19908	1.40742	0.289223	0	0	0	0
MSTRG.17015.1	2.18023	0	1.03411	0	0	2.52206	0	0.480346	0.387112	0.371798
MSTRG.17016.1	0	0	0	0	1.71289	0	0	1.80724	2.60801	0
MSTRG.17028.1	0.891222	0.721232	0.89239	0.521636	1.46961	2.09411	0.691644	0.814429	2.82325	2.48225
MSTRG.17028.3	1.97533	1.97882	0.000411323	5.66457e-06	2.58095	1.54763	2.12571e-05	0.717617	2.36271	0.989105
MSTRG.17066.1	2.59085	1.31584	0.948853	0.794731	0.340551	0.334096	0.433612	0.325634	0.515439	0.606267
MSTRG.17073.1	1.89951	2.21666	3.46809	4.77385	3.27977	0	3.41578	3.91757	5.97475	3.5438
MSTRG.17080.1	0.780042	3.5642	3.28584	1.13056	1.41272	0.262778	0.20549	1.02123	2.34398	1.42538
MSTRG.17081.1	0.941906	2.02469	1.12065	1.09278	1.53014	0.448907	0.595908	0.0897815	0.994533	0.131879
MSTRG.17082.1	2.50416	1.84977	0.801682	1.52531	1.98055	0.811388	2.47937	1.16919	2.71053	0.279828
MSTRG.17083.1	0	0	0.526768	0	1.57881	0.242355	0.550615	0	0.212032	0.535745
MSTRG.17087.1	0	4.25484	0.911432	1.72663	0.457901	0.42668	0	0.444231	0	1.2045
MSTRG.17088.1	0	5.72773	2.14165	1.93649	1.02896	0	0	0.952865	0	0
MSTRG.17103.1	0.574927	0	0.559224	1.07433	0.284731	0.300029	3.50149	0.794295	0.209416	0.365792
MSTRG.17106.1	0	1.03271	0	0	0	0.829712	0	0	2.66374	0.631874
MSTRG.17113.1	0.479998	0.590187	0.590948	0.928494	0.791026	0.610724	0.870996	0.633867	1.16311	0.969843
MSTRG.1712.1	0.175458	0	0.174075	0.849164	0.578173	0.351254	0.926247	0.583706	1.25735	0.725065
MSTRG.17120.1	0.756623	1.90313	0.498527	0	0.221309	0.487977	0	0.239126	0.0966674	0.164916
MSTRG.1713.1	0.814278	0	0	0	1.06215	0.427033	0	1.115	0.912721	0.820873
MSTRG.17137.1	0	0	0	2.33247	1.8805e-202	0	6.42889e-163	1.743	2.19059e-134	0.423224
MSTRG.17143.1	0	0	0	0	0	0	0	0	1.70744	0
MSTRG.17147.1	0.995158	1.18129	2.27301	2.0016	1.28825	1.22858	1.67792	1.63766	1.05025	1.06807
MSTRG.17147.3	0.788526	1.29487	3.48796	9.71338e-40	0.196665	0.577271	1.27098e-34	3.66923e-22	0.000965035	1.25372e-27
MSTRG.17147.5	0.886093	1.06869	4.28586e-98	0.901495	1.79383e-13	1.07576	7.47166e-23	2.33814e-16	2.44505e-25	0.605972
MSTRG.17147.6	1.21256	0.00225473	0.728552	0.000504304	1.47423	0.345706	0.924326	1.4198	0.528336	1.19479
MSTRG.17147.7	0.000114606	1.97994e-55	3.76016e-05	1.77058	0.00840434	0.254268	0.257938	0.160242	0.576741	0.70046
MSTRG.17149.1	1.29161	1.76099	0.93466	1.82803	1.16413	1.5278	1.37168	1.62774	1.1456	2.25334
MSTRG.17150.1	0	0	0	0	0	0	0	0	0	1.93662
MSTRG.17150.2	0	0	0	0	0	0	0	0	1.83356	1.84875
MSTRG.17159.1	0.059711	0.2646	0.550219	0.409842	1.4514	0.900226	1.16379	5.19108	1.13669	5.01519
MSTRG.17160.167	1.06034	0.812631	0.45139	0	0.754756	1.44781	0.480949	1.30143	2.73502	0.228969
MSTRG.17160.168	0.335887	0.137433	0.581282	0.780183	0.818047	0.6264	1.50238	1.64472	1.70719	1.35335
MSTRG.17160.20	1.69584e-43	0.487463	0.468746	1.46561e-35	0.303912	1.10095	0.453056	0.163786	0.409174	0.273911
MSTRG.17160.35	0	0.437358	1.13902	1.73714	1.20636	1.02603	0.400945	1.01212	1.50116	1.68655
MSTRG.17160.36	4.4074e-241	0.0896983	1.16657	0.93362	0.968694	0.771334	1.90686	1.4533	0.780687	1.30134
MSTRG.17160.38	2.95017	4.34738	7.42877	6.24173	6.06514	6.05558	6.51899	4.06731	7.50367	5.69791
MSTRG.17162.12	0	0	5.38822	3.19615	0	0.430184	3.16519	0.716739	0.560594	1.34177
MSTRG.17162.13	0.628542	0.446095	0.281283	7.79732e-251	1.21751	0.403348	2.47675	0.559555	0.64534	0.721223
MSTRG.17164.1	0	0	0	0	1.6979	1.13512	1.45067	0.750617	0.199304	0.833667
MSTRG.17164.2	0	3.54697	2.87049	2.66421	12.653	3.70962	4.30223	7.47833	12.2835	9.70904
MSTRG.17164.3	0	0	6.51951e-130	0	0	2.22637	0	3.20672	0.85493	1.68046
MSTRG.17164.4	0	0	0	0	0	0	3.06661	0	0	1.80927e-202
MSTRG.17165.1	1.2385	1.37395	1.62005	1.70053	1.60832	1.37777	1.54474	1.76217	2.40022	1.95774
MSTRG.17166.1	0.666435	0	0	0	1.24992	2.63831	0	1.15596	0	3.91944
MSTRG.1717.1	0	0.354904	0.820314	0.96078	0.665756	0.405085	1.92153	0.787181	1.05431	1.15377
MSTRG.17170.1	3.10109e-279	0	1.6237	0.834701	1.24206	0.646959	0	1.47304	0.42093	0.763509
MSTRG.17172.1	0	4.01564	0	3.57286	1.4861	3.23675	0	2.17468	1.79142	3.3087
MSTRG.17173.1	0.27921	0	0.410215	1.05823	1.06596	0.946213	1.37679	0.77077	2.13873	1.3174
MSTRG.17174.1	1.65903	3.60411	5.69272	8.64579	6.3047	3.36266	11.9735	7.79762	10.4983	6.80379
MSTRG.17175.1	0.476131	0.518673	0.465382	0.448715	0.445956	0.743898	0.975928	0.663526	2.12687	1.31666
MSTRG.17178.2	2.01538	1.86018	0.00438949	1.11271	0.601847	1.09565	1.90854	0.536993	1.97565	0.980027
MSTRG.17178.3	1.45e-184	0.436905	0.577383	1.23565	0.203385	0.192492	1.61877e-99	1.03671	0.169145	0.196116
MSTRG.17179.1	2.45027e-291	1.21545e-237	0.697521	0	0.325613	0.314041	1.24669	0.337287	0.523101	0.513035
MSTRG.17184.1	3.84081	1.70275	0.89434	0.870789	0.445127	0.874075	0.712005	0.107313	0.507837	0.5399
MSTRG.17188.1	0	0	0.763021	0.494673	0.338791	0.400366	1.34781	0.366056	0.581921	0.662082
MSTRG.17190.1	0	2.23946	0	0	1.87159	0.975721	0	1.82191	0.357519	0.671253
MSTRG.17197.1	0.155188	1.32752	2.93972	3.71295	5.067	3.4896	6.12257	3.56627	7.05632	3.86614
MSTRG.17198.1	0	0	0.248643	0.725546	1.13925	0.504192	1.58158	0.119315	0.575229	0.488127
MSTRG.172.1	0.872056	1.2857	1.32075	1.28357	2.35738	1.96771	2.2627	1.62044	2.4258	2.49061
MSTRG.17200.1	0.528468	0.569997	2.08794	3.04481	3.87082	2.83892	1.65909	1.37724	1.67637	1.84523
MSTRG.17201.1	0.425819	0	0.421673	0.205391	1.27644	1.56626	0.895794	0.606991	2.09233	1.19241
MSTRG.17203.1	2.30093	1.96792	2.29404	4.41929	1.04862	1.69826	1.79939	1.68315	0.954465	0.426981
MSTRG.17224.3	0.430158	0.948629	1.72896	4.19101	1.17284	1.30039	4.26417	3.73528	5.36898	3.31296
MSTRG.17243.1	35.9745	30.008	19.2512	16.146	12.6075	15.0511	11.7928	17.4928	11.1877	15.4407
MSTRG.17253.2	0	0	0.378873	0.493816	0.0558264	0	0.404185	1.0273	0.857764	0.274739
MSTRG.17255.1	1.42155	7.18408e-06	1.01484e-05	0.938998	0.633024	0.657464	1.09994e-05	1.01911e-05	0.162197	1.12349
MSTRG.17257.1	5.77909	4.07265	9.20365	9.1324	3.5931	6.26325	6.39187	4.32748	4.19466	3.06199
MSTRG.17258.1	0	0	0	0	0	0	0	1.75461	0	5.08512
MSTRG.1727.1	1.1559	1.62201	1.00875	2.54119	0.953791	1.62092	1.69582	1.9797	1.65981	2.22769
MSTRG.17273.1	0	0	0	0	3.86641	0	0	0	0	0
MSTRG.17296.1	3.18555	1.99205	2.77131	2.83739	1.88986	3.08431	2.53336	2.91441	2.54999	2.81593
MSTRG.17298.1	2.82947	3.2243	5.28546	1.23178	1.263	2.01115	2.65526	0	2.77937	3.22785
MSTRG.17300.1	0	0	0	0	0	1.37559	0	0.656147	0	2.53393
MSTRG.17301.1	0	0.273273	0.751543	0.243651	0.627514	0.455287	0.53111	0.600978	1.14515	0.42818
MSTRG.17306.1	1.56713	3.53188	3.42371	4.40641	3.64227	2.5155	1.49193	2.9154	2.13275	2.62671
MSTRG.17316.1	1.38732	2.69508	2.19104	1.0645	0.525345	0.824776	0.289978	0.656554	0.102586	0.351031
MSTRG.17322.1	0	0.12217	0.567558	1.77631	0.745384	0.932998	1.09057	1.25316	0.771221	0.895884
MSTRG.17327.1	0	0	0.945964	2.68442	0	0	0	0	2.83773	0
MSTRG.17328.1	0	0	2.06823	0	0	0	0	0.480346	0.834389	1.05537
MSTRG.17330.1	1.69463	1.72827	2.44909	2.30633	2.66724	1.52577	1.59527	2.40578	0.794751	1.2473
MSTRG.17331.2	0	1.02732	0	0	0.235647	0	0	0	0	0
MSTRG.17337.1	0	0	0	0.955823	0	0.562367	0	0.965984	2.06909	0.348253
MSTRG.17338.1	0	0	0	0	0	0.333048	0	0	1.21867	0.216338
MSTRG.1735.1	2.65727	8.01644	4.89461	6.86222	8.2633	7.26128	7.53597	7.93429	7.11456	7.73406
MSTRG.17350.1	0	0	0.912736	0.888535	3.42006	3.04339	5.56969	4.26951	5.98451	2.96081
MSTRG.17358.2	0	0	4.12787	0	0	0.65765	0	0	0	0
MSTRG.1736.1	5.14806	13.3453	8.37039	8.01029	12.1415	10.9961	9.76688	10.1131	10.3292	10.5269
MSTRG.17364.1	5.4706	1.41137	1.3825e-05	0.409391	0.378933	0.388226	4.96833e-05	0.692654	0.505342	0.639217
MSTRG.17364.2	3.13498	0.640597	1.13754	0	0.254917	0	1.18647	0.704982	1.94597	0.804314
MSTRG.17365.1	3.30364	4.73622	2.91979	2.64019	1.47454	1.66963	1.12112	1.54789	0.95926	1.51311
MSTRG.17368.1	0.177645	0.38167	0.352451	0.343833	0.923505	0.343497	1.12511	0.761419	0.866567	0.65101
MSTRG.17374.1	2.3581	2.86822	1.24888	2.5911	0.783166	0.689185	0	0.599926	0.236575	0.579487
MSTRG.17378.1	0.089971	5.85252e-08	0.439554	0.953203	1.04237	0.870818	0.753705	0.871707	0.411598	0.400275
MSTRG.17381.1	0	0	0	3.99631	0.664462	0.823119	4.30223	0	2.80833	2.01067
MSTRG.17382.1	0	0	1.82042	1.74529	1.63649	1.2603	1.89515	1.44751	4.40849	2.64395
MSTRG.17383.1	0.654085	0.70397	1.51095	1.05116	0.939664	0.828425	0.916863	1.3467	1.39194	1.29445
MSTRG.17392.1	0.223901	0	0.2216	1.07891	0.703983	0.433106	0.941007	0.638116	0.168635	0.302529
MSTRG.17393.1	0	0	0	0	1.06428	0	2.15293	3.37302	0	0
MSTRG.17394.1	0	0	0	5.01789	0	0	0	0	0	0
MSTRG.17395.1	0	0	0	0	0	1.01767	0	0	0	0
MSTRG.17397.1	0.127148	0.136269	0.758707	1.3597	0.961346	0.93448	1.07918	0.908878	1.63182	0.944799
MSTRG.17399.1	0.227358	0.296416	1.46464	1.5864	0.814941	1.05206	1.67897	1.55306	1.10325	1.62279
MSTRG.1740.1	0.702239	0.373927	0.592249	1.25941	0.947034	0.829328	0.906838	1.02865	1.81172	1.0836
MSTRG.17405.1	1.14624	0.177197	1.98764	3.91104	7.93895	7.50858	7.82762	4.70034	6.65706	5.399
MSTRG.17418.1	0.525449	0.376265	0.347544	1.52585	0.92351	0.405375	0	0.75084	0	0.514783
MSTRG.17421.1	4.58618	3.37637	6.62966	2.10775	4.11112	3.0406	3.0475	5.46972	5.63137	5.66725
MSTRG.17421.2	0.419996	0.456317	2.46992	1.19331	2.57286	1.4692	0.865611	1.38138	1.61339	0.78698
MSTRG.17435.1	0	0	0	1.13002	0.529078	0.815128	1.22728	1.96853	0.919203	2.31931
MSTRG.17436.1	0.72151	0.390865	6.02865	4.46495	4.77394	2.52186	7.10466	6.46319	6.65436	7.81443
MSTRG.17449.1	0	0.257389	0.236285	0.689832	1.22116	0.445681	0.75196	1.47356	1.51931	1.19796
MSTRG.17450.1	0	0	0	0	0	2.86701	0	6.96835	0	1.65247
MSTRG.17465.1	2.68122e-06	1.28236	0.300613	0.255488	0.591356	1.36822	0.979413	1.00365	0.376232	0.471462
MSTRG.17466.1	0.384384	1.0986	0.637095	0.373653	1.40303	1.71618	1.49517	0.795618	0.290907	0.339543
MSTRG.17467.2	1.69783	0.725654	0.165301	0.164424	0	0.0747143	0	0.079187	0	0
MSTRG.17473.1	0.855591	2.29406	4.95975	3.46092	2.66548	2.98148	2.41687	3.81007	2.9479	4.06973
MSTRG.17476.1	0.425363	1.82474	2.11361	0.688298	1.75798	0.704456	2.85395	1.96589	1.5901	1.38742
MSTRG.1748.1	0.429028	0	1.26096	0	1.236	1.69343	1.32517	1.21029	0.80577	1.55288
MSTRG.17482.1	0	0	1.74613	0	0.557484	1.2512	1.21339	1.67662	0.435915	1.23245
MSTRG.17491.1	4.73395	1.31278	0.613049	4.5743e-05	0.115796	0.35475	0.772402	0.297842	3.55955e-05	4.80213e-05
MSTRG.17493.1	0	0	0.801682	0	0	0.811388	0	0	0.670573	1.02925
MSTRG.1750.1	0	3.82735	0	0	0	0	0	0	0	0
MSTRG.17500.1	0.880787	0.478937	0.431211	1.24902	0.385276	1.05097	1.35876	1.4495	0.484486	0.855117
MSTRG.17517.1	5.89908	10.0386	6.4086	7.51445	11.8407	9.91764	8.20333	10.2467	12.7908	9.79937
MSTRG.1752.1	0	0	2.15758	0	0.493059	0.601821	2.1938	2.11154	2.21671	0.758066
MSTRG.17523.1	0	0	0	1.3321	0	0	0	0	1.31944	0.472354
MSTRG.1754.2	1.8151	1.77156	1.31035	0.319738	0.894911	1.07158	0.6976	0.707448	1.12053	0.432409
MSTRG.17541.1	0	0	0.937088	0	0.426138	0	1.91908	0	0.750423	1.5909
MSTRG.17542.1	5.16439	0	0	3.59815	0	0	3.79454	3.50922	0	0
MSTRG.17563.1	0.894603	5.96447	0.856702	0.813227	0	0	0	0	0	0
MSTRG.1757.1	0.231039	2.39865	0.492372	0.747599	0.512195	8.21005e-06	1.93983	1.40762	0.535518	1.27928
MSTRG.1757.3	0.153695	0.932133	0.192514	1.20842	0.684463	0.752416	0.467007	0.807849	0.679894	1.01664
MSTRG.1757.4	2.64332e-30	0.174292	1.28868	0.931847	0.584906	0.270995	1.04025	1.31714	1.00797	1.98458
MSTRG.1757.5	0.716511	1.96156e-12	1.08914e-05	0.414238	0.551643	0.394506	0.938828	0.865208	2.41485	0.707749
MSTRG.17570.1	0.130645	2.94083	3.11775	4.31695	3.91663	3.02462	0.277119	4.16672	2.50919	4.29157
MSTRG.17571.1	0.581632	0.636759	1.13112	1.62934	0.287887	0.56423	1.77001	1.07651	0.898363	0.599059
MSTRG.17580.1	0.737964	0.6856	0.972766	0.236599	0.825159	0.458875	0	1.12033	0.926166	1.04829
MSTRG.17580.2	1.15311	0.536784	2.18113	1.02577	0.498652	0	3.3247	1.75721	1.35948	0.000802894
MSTRG.17585.1	8.44722	7.54908	6.71615	5.74142	11.2258	11.6448	12.3805	11.2821	13.2068	13.4441
MSTRG.17614.1	0	0	0	0.561775	1.08666	2.38378	0.610148	0.553782	2.48488	1.36183
MSTRG.17616.1	0	0	0	0	0	0	0	2.00352	0	4.2962
MSTRG.17617.1	0	0	0	0	0	0	0	0	0	2.57224
MSTRG.17631.1	0.929595	0.477431	1.10563	3.9527	2.13745	1.28054	1.03401	1.87477	0.821978	1.10945
MSTRG.17631.2	0.643668	1.28427	1.46458	0.00276421	0.978045	0.874095	2.25315	1.06279	2.67611	2.19624
MSTRG.1765.1	0	0	0	0	2.03099	4.20845	0	5.66319	0	1.69504
MSTRG.17686.4	0.475728	0.353457	0.167863	9.05034e-07	4.48369e-19	0.206655	0.111895	0.106176	1.2079	0.23294
MSTRG.17687.1	0	0	0	2.84201	0.21515	0	0	0	0.324177	6.13706
MSTRG.17707.1	1.4353	1.63833	2.16502	3.05662	3.05173	2.36756	3.58915	2.71766	3.94986	3.34068
MSTRG.1771.1	0.391941	0	0	0.37212	0.540335	0.379614	0.405009	0.366852	1.4603	1.17268
MSTRG.17713.1	4.75655	3.71601	1.42747	1.18239	0.743414	1.1253	0.351982	0.596696	0.42867	0.473005
MSTRG.17715.1	0	0	1.37204	0	1.54606	1.7504	0.711337	1.30201	0.513742	0.482338
MSTRG.17716.1	0.40631	0	1.19552	1.54109	1.90991	0.911404	1.67706	0.573715	4.4108	1.66606
MSTRG.17717.1	0	0	0	1.97539	0	0	0	3.29649	0	0
MSTRG.1772.1	0	4.52729	0	0	0	0	0	0	0	0
MSTRG.17722.1	0	0	1.05266	1.35955	0.781586	1.91319	1.85028	1.68161	1.34022	1.78513
MSTRG.17736.1	0.186656	0.280601	2.10758	2.32604	0.853143	2.04978	3.11096	1.29714	3.99289	2.79094
MSTRG.17736.2	0.643039	0.807195	1.24818	1.91245	3.36591	0.841411	2.00776	2.48355	3.6933	2.77988
MSTRG.1774.1	0	0	0	0	0.397474	0	0	0.42586	1.18663	1.06595
MSTRG.17741.1	0.166108	1.42676	0	0.482754	0.328678	0.246534	0.175542	0.158288	1.06469	0.0975514
MSTRG.17747.1	0.310063	0.463826	1.60874	2.48641	2.23481	1.75358	2.58288	1.84253	4.11885	2.65616
MSTRG.17759.1	4.84712e-10	2.56195e-08	2.49371e-10	4.48336	6.26933e-10	1.57808e-09	1.11669e-08	4.23429e-09	4.82554e-08	2.48387e-08
MSTRG.1776.1	0	0	0.710425	1.35659	0.359638	0	0	0.678929	0	0.469832
MSTRG.17769.1	2.24883	3.36457	5.13626	4.43558	4.29571	4.32214	4.4766	3.61804	3.34819	5.93481
MSTRG.17771.1	4.26809	6.67527	9.3092	10.0668	11.1534	10.0338	11.4767	10.7711	7.94828	9.96987
MSTRG.17789.1	0.157207	3.20566	0	0	0	0	0	0	0	0.0571974
MSTRG.17790.2	0	0	0	0.135007	0.0865355	0.601302	7.84208e-13	1.11073	1.05477	0.79239
MSTRG.17790.3	0	0	0	0	0.227603	0.000460267	2.84379e-05	0.136802	1.74821	2.06432
MSTRG.17796.1	0	0.290451	0	0.258413	0	0.502243	1.40799	1.02004	0.103329	1.07308
MSTRG.1780.1	0	0	0	0	0	2.10422	0	2.15396	12.0322	0
MSTRG.17804.1	0	0	0.559224	0	0.75283	0.300029	1.16716	0.52953	2.12341	1.24395
MSTRG.17805.1	0.521215	0.279343	0.518277	0.633207	0.870486	0.445165	1.10562	0.994603	1.81791	1.10519
MSTRG.17822.1	0	0	0	4.11606	0	4.174	2.1969	0	1.70986	1.61061
MSTRG.17826.2	0.86098	0.432672	0.877213	0.842853	0.506287	0.652751	1.26708	0.871755	0.900782	0.787921
MSTRG.17858.1	6.92271	6.21487	1.22103	0	0.548904	0.281954	0	0.872366	0.228614	0.187242
MSTRG.17871.1	0.247207	0	0.244382	1.90197	0.36036	0.350146	0.518272	0.351712	2.04767	0.980833
MSTRG.17873.1	0	0	0	0	0	0	0	0.952865	1.60171	0
MSTRG.17874.24	0	1.11973	5.05843e-275	1.80608	0	0	0.977021	5.89245e-241	0	0.341602
MSTRG.17874.51	1.75549	3.41425	4.14914	6.91181	4.69951	8.33017	3.85476	6.47372	10.1558	3.57511
MSTRG.17874.67	2.75246e-141	0.664699	1.9079e-125	0.169407	0.109917	0.0123234	1.34734	7.82479e-14	0.073916	5.51426e-47
MSTRG.17875.1	0	0	1.69668	0	0.507685	0	1.77001	0.546837	0.423574	1.14198
MSTRG.17877.1	0	0.486622	6.14061	1.56986	6.72301	2.42271	9.27348	3.49369	5.23799	4.80266
MSTRG.17877.2	0	3.06697e-30	0	0	0	5.84816e-119	2.49244e-268	7.6285e-83	2.37025	0.0701923
MSTRG.17877.3	0	5.67169e-183	5.07693e-165	0	1.07105	0.641192	0	3.97513e-28	0.785629	1.75502
MSTRG.17879.2	0	0	4.35828	0	3.29305	6.13069	0.895457	4.99183	1.10464	2.72662
MSTRG.17879.3	0	0	1.93525	0	0	0	0	0	0	0
MSTRG.17879.5	0.699998	1.13103	2.50349e-197	1.29397	0.629148	0.790782	1.4686e-152	0.877883	0.299283	0.243659
MSTRG.17879.7	5.78613	10.2291	4.38073	6.15131	14.817	6.18586	7.49896	7.98461	3.78006	9.45563
MSTRG.17879.8	3.25628e-16	2.54606e-13	3.40793e-13	6.1115e-11	2.71303e-13	3.05586	3.55028	0.000660387	2.15721	5.94492e-06
MSTRG.17879.9	3.09292e-18	2.8161e-21	2.17039	1.4447e-18	6.92302e-25	3.26873e-29	4.81924e-29	8.21005e-12	1.09048e-15	5.74243e-14
MSTRG.1791.1	3.16036	2.14353	1.16303	0	0.794762	1.53053	1.22428	1.6707	1.33439	0.717484
MSTRG.17911.1	0	0	0	0	0	0	0	1.45546	0	0
MSTRG.17916.1	17.2081	19.1751	17.565	12.6784	7.09043	9.55964	7.68937	6.28088	6.16935	6.80053
MSTRG.17927.1	2.94819	0	0	0	0	0	0	0.914025	0.701629	0
MSTRG.17932.1	0	0	0	0	0	1.08563	0	0.980151	2.76702	0.336223
MSTRG.17936.1	0	1.09663	0	0.944859	1.41101	1.06494	1.97571	3.29181	0	1.02133
MSTRG.17937.1	0.978663	0	1.95494	2.91933	1.4041	1.45711	1.11585	0	2.16775	2.89388
MSTRG.17944.1	0.396616	0.44306	0.378576	0.385262	1.34462	1.5848	2.04667	0.568945	2.01143	0.668509
MSTRG.17945.1	0	0	0.502888	0	0.513201	0.231118	1.05258	0.238637	2.12451	0
MSTRG.17956.1	0	0	1.37596	1.27998	1.27129	2.35639	0	0	0.626661	0.450474
MSTRG.17957.1	0	0.458284	0.413357	0.39939	1.76931	1.28625	0.43456	1.58396	0.473466	1.66424
MSTRG.17958.1	0	0	3.20293	0	0	2.01705	2.98336	1.64057	2.38426	3.85277
MSTRG.1796.1	0	0.576647	0.709915	0	1.23133	0.667456	1.51071	1.02221	1.68442	1.07943
MSTRG.17965.1	3.96757	3.50171	1.7319	2.03654	3.74594	1.58386	2.65108	2.02633	4.00854	3.69028
MSTRG.17965.2	1.39645	3.61502	3.29763	2.93914	1.01656	1.551	0.821343	2.27883	2.07656	2.16692
MSTRG.1797.1	0.988299	8.78188	6.03346	5.62038	4.38976	2.85602	4.03864	3.03511	3.23702	2.30241
MSTRG.17974.1	0	0	0	0	0.607899	1.16237	0	0.564364	0.916447	0.860154
MSTRG.17980.1	0	2.9403	0	0	0	0	0	0	16.8721	0
MSTRG.17984.1	0.338413	0.00332396	0.671681	0.00362757	0.0761579	0.229619	0	0.48399	1.21262	1.57152
MSTRG.17991.1	0.487764	0.174538	0.807051	0.157558	0.512075	0.544557	1.0313	0.620238	1.34608	0.437465
MSTRG.17995.1	4.98289	6.31598	6.33014	5.47762	3.4066	4.24812	1.96664	2.8061	2.14197	2.79208
MSTRG.17998.1	0	0	2.64204	0	0	4.90172	0	0	0.986205	1.04397
MSTRG.18001.1	0	0	0	3.16366	1.77023	0	3.34447	0	0	0
MSTRG.18002.1	0	0	0.549982	0.528486	0.526842	0.548172	2.29682	0.797372	0	1.13009
MSTRG.18008.1	0.821292	0.663165	1.24281	2.85733	1.17051	0.959139	0.984478	0.818013	0.0767994	0.267437
MSTRG.18009.1	0	0	0	2.09534	0	0.526717	1.13161	1.60827	0	1.47333
MSTRG.18010.1	0	0	1.82918	0	0	0.891248	0	0.823458	0	2.37614
MSTRG.18015.1	0.754788	0.8804	0.721032	0.701125	0.816224	1.01994	0.901033	1.29214	0.235534	1.13998
MSTRG.18015.3	5.79169e-117	3.1939e-95	5.02603	3.09573e-40	0	8.06503e-48	0	6.13095e-63	0	0
MSTRG.18017.1	0.530474	0.865403	1.17421	0.930784	1.0385	1.06052	1.49908	0.911749	2.29593	0.977701
MSTRG.18018.1	0	2.16426	3.3104	3.36686	3.073	2.84171	4.78777	0.307151	2.21892	1.4367
MSTRG.18029.1	2.12685	3.2359	2.50085	0	0.213382	1.076	1.31434	0.198482	4.62464	0.293738
MSTRG.18037.1	0	0	0	0	4.06199	0	0	1.75461	0	1.53689
MSTRG.1804.1	1.95246	0.788083	0.0527464	0	0.0137075	0	0	0	0.0703862	0.00771716
MSTRG.18044.1	0	0.42023	0	1.1038	2.23004	1.27177	5.20611	2.5526	3.7418	2.92825
MSTRG.18046.1	1.75721	1.91988	2.02091	2.25687	2.21166	2.37991	1.9818	1.37837	1.13144	1.54511
MSTRG.18049.1	14.121	51.8401	34.5672	19.4268	40.7601	34.9674	25.6913	27.9135	43.7353	32.9808
MSTRG.18050.1	1.0813	1.77224	2.63384	1.0133	1.73326	1.08818	0.573546	2.32994	0.606566	1.01275
MSTRG.18057.1	1.8203	4.2461	4.50007	3.20296	9.23402	7.30407	7.73163	3.17279	12.018	5.98702
MSTRG.18058.1	0.326509	0	0.643015	0.9354	1.39833	0.971169	0.679159	0.463631	3.93471	0.637883
MSTRG.18061.1	0	1.42745	0.62977	0	1.45298	0.630744	0.654864	2.11163	2.18625	0.416078
MSTRG.18062.1	0	0.692578	0.630827	1.22386	1.25332	0.453691	1.33298	0.755645	1.92183	0.747954
MSTRG.18071.1	14.1707	12.7812	11.8026	10.2778	12.8861	9.07397	8.94081	11.372	11.5213	12.6122
MSTRG.1808.1	0	0	0	0	0	0	3.70557	0.440128	0.676264	0.634921
MSTRG.18083.5	0.741925	4.228	5.77087	6.69622e-22	4.0914	4.21843	3.49225	2.44583	5.98136	3.16866
MSTRG.18085.1	13.4818	29.3539	25.7737	31.3435	26.6147	23.2712	56.4891	21.8205	51.2562	37.1795
MSTRG.18086.1	4.36144	5.07074	9.1244	10.667	5.75754	1.76607	5.03309	5.3872	4.07459	5.2639
MSTRG.18092.2	1.45278	0.167919	2.8095e-06	0.15171	0.401772	0.151246	0.165514	0.223585	0.711372	0.233032
MSTRG.18105.1	0	0	0	0	0	0	0	0	1.97916	0.529741
MSTRG.1811.1	0	0.361544	0	0.489173	0.739621	0.58574	2.66809	0.800252	1.26693	1.6905
MSTRG.18112.1	0	0.571682	0.510604	0.491423	0.749659	0.272966	2.13662	1.7128	0.615218	2.18363
MSTRG.18113.1	0	0.470456	0	0	1.19117	0.419285	0.445392	1.42482	0.485763	2.2674
[truncated: 7,098 more rows]
